# Supplementary material
Source: PubMed Central journal article supplement (PMC3023904)

# Cardenolides of *Leptadenia madagascariensis* from the Madagascar dry forest

*Ende Pan, Liva Harinantenaina, Peggy J. Brodie, Martin Callmänder, Stephan Rakotonandrasana, Etienne Rakotobe, Vincent E. Rasamison, Karen TenDyke, Yongchun Shen<sup>d</sup>, Edward M. Suh, David G. I. Kingston*

## Supporting Information

Pages 2-7 <sup>1</sup>H NMR, <sup>13</sup>C NMR, COSY, HMQC, HMBC, and ROESY spectra of **1** in pyridine-*d*<sub>5</sub>:

Pages 8-13 <sup>1</sup>H NMR, <sup>13</sup>C NMR, COSY, HSQC, HMBC, TOCSY, and ROESY spectra of **1** in CD<sub>3</sub>OD.

Pages 14-19 <sup>1</sup>H NMR, <sup>13</sup>C NMR, COSY, HMQC, HMBC, and <sup>1</sup>H NMR (0-8 ppm) spectra of **2** in CD<sub>3</sub>OD.

Pages 20-24 <sup>1</sup>H NMR, <sup>13</sup>C NMR, COSY, HMQC, and HMBC spectra of **3** in CD<sub>3</sub>OD.

Pages 25-32 HMBC, COSY, HMQC, <sup>1</sup>H NMR, TOCSY, <sup>13</sup>C NMR, and ROESY spectra of **3** in pyridine-*d*<sub>5</sub>.

Pages 33-39 <sup>1</sup>H NMR (pyridine-*d*<sub>5</sub> and CD<sub>3</sub>OD), <sup>13</sup>C NMR (pyridine-*d*<sub>5</sub> and CD<sub>3</sub>OD), COSY, HMQC, and HMBC spectra of **4**.

1:1 NMR of 1 in d-Py

2

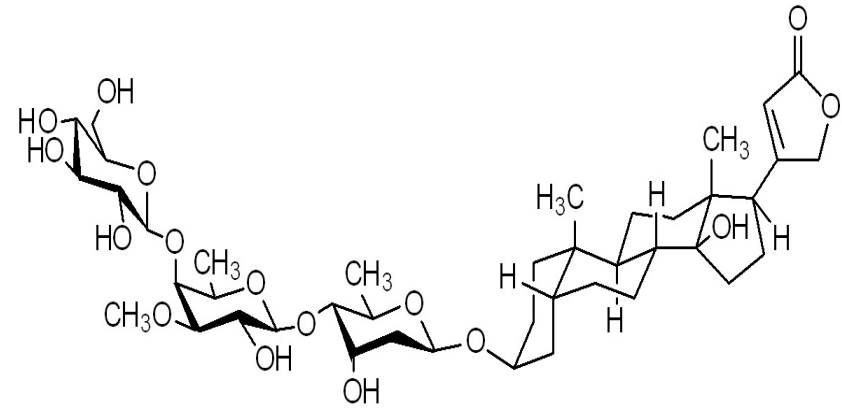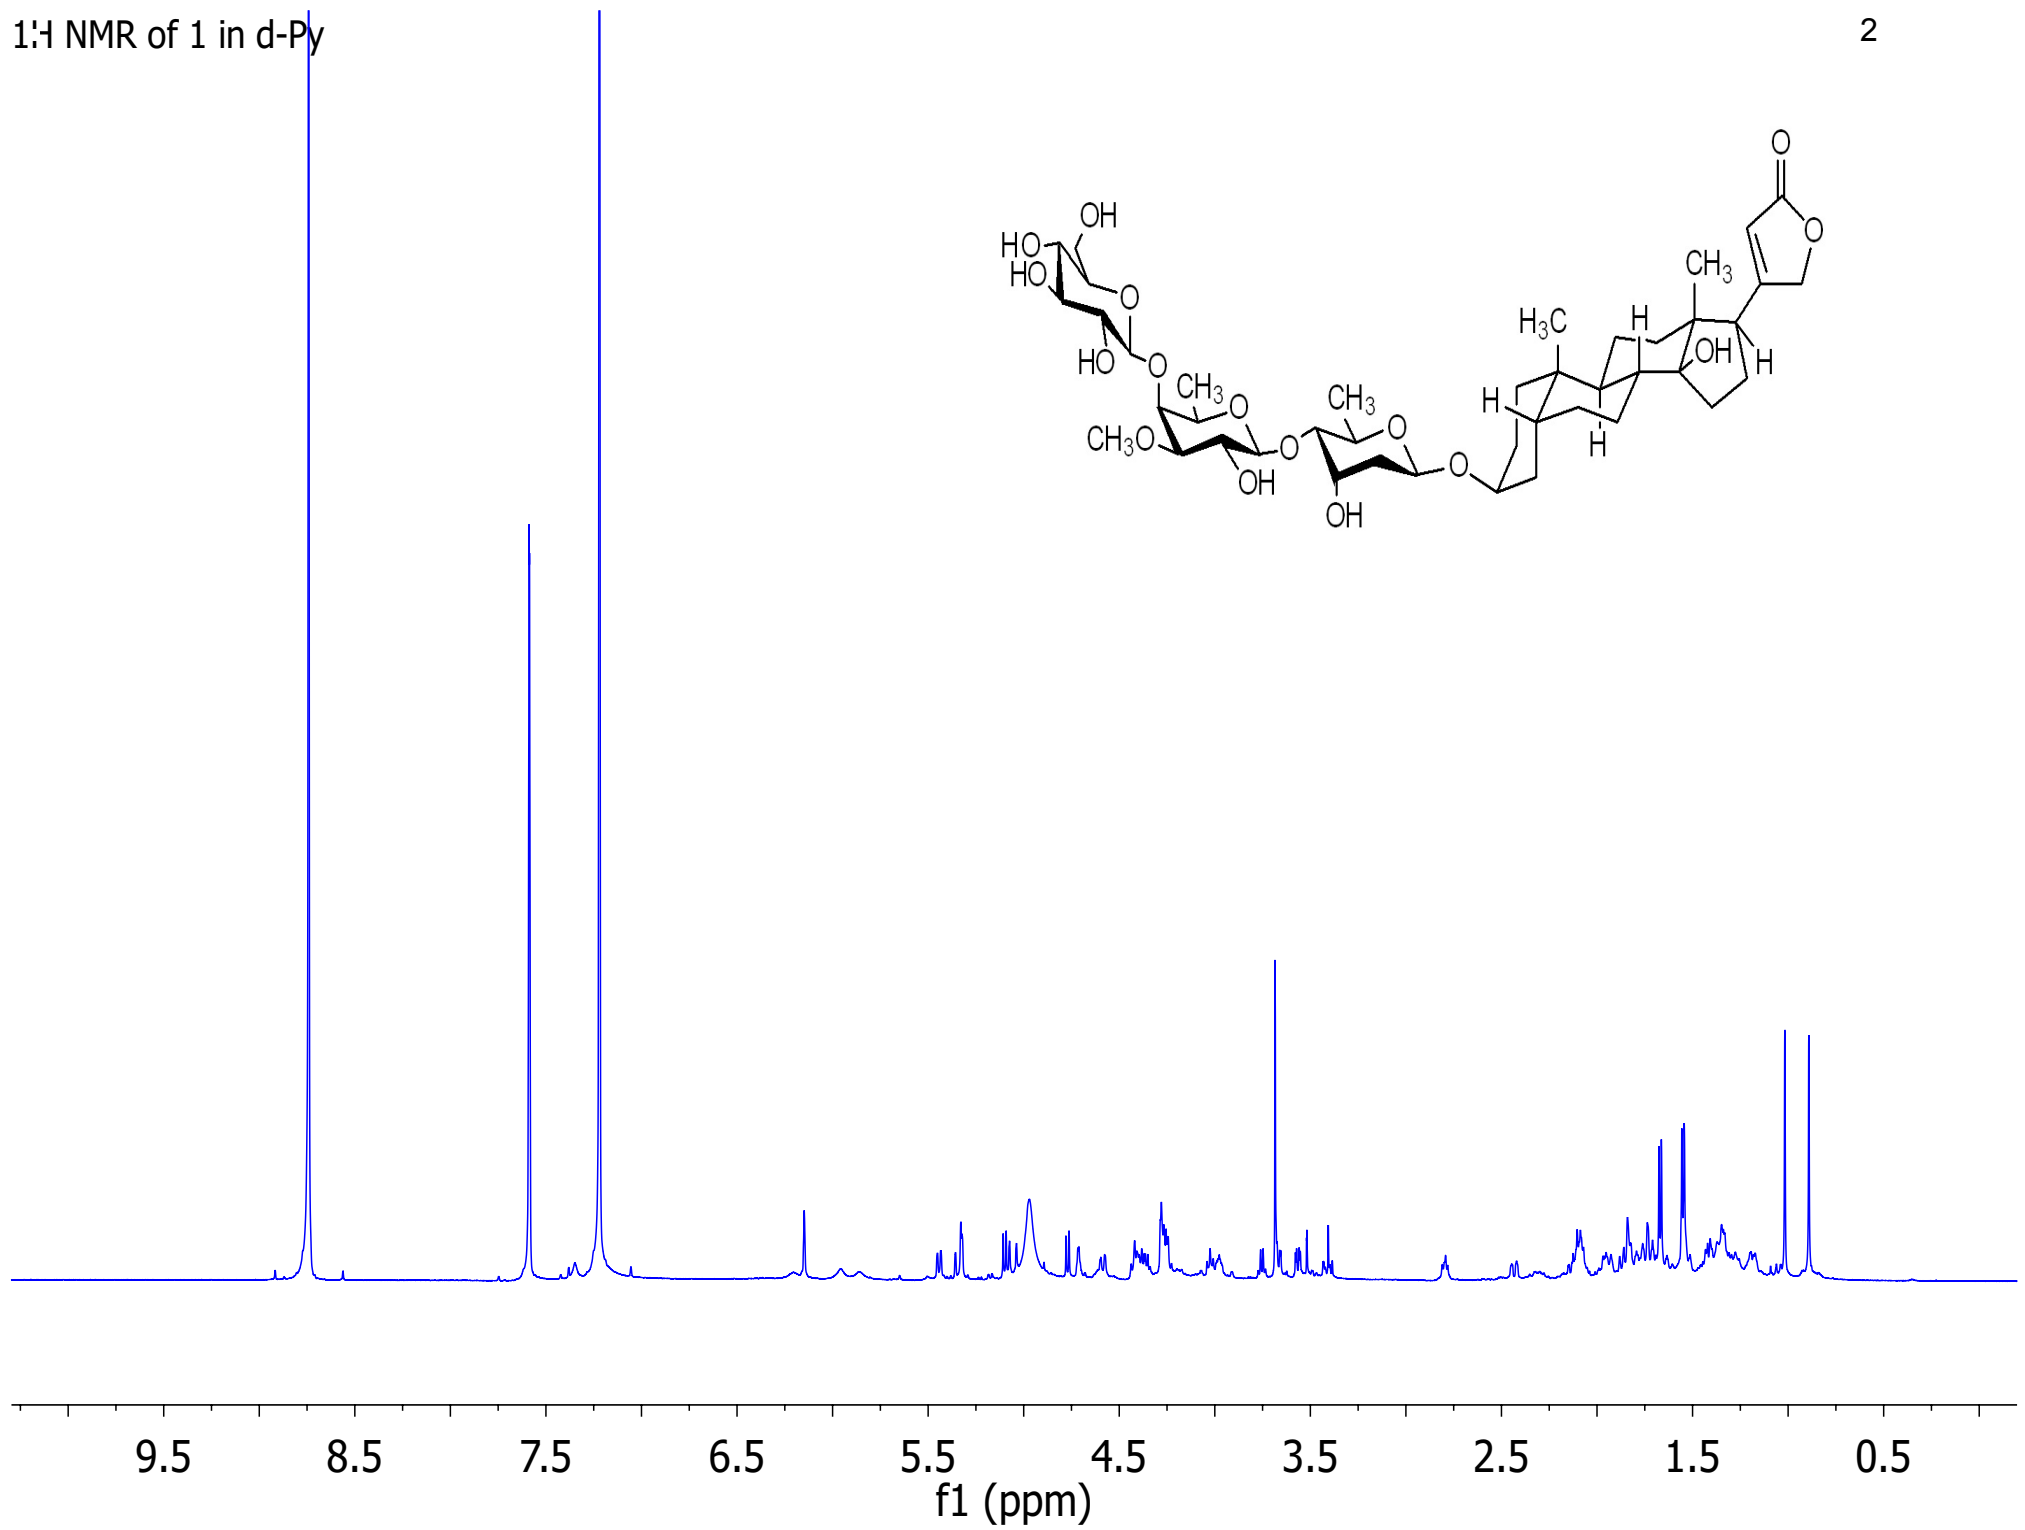

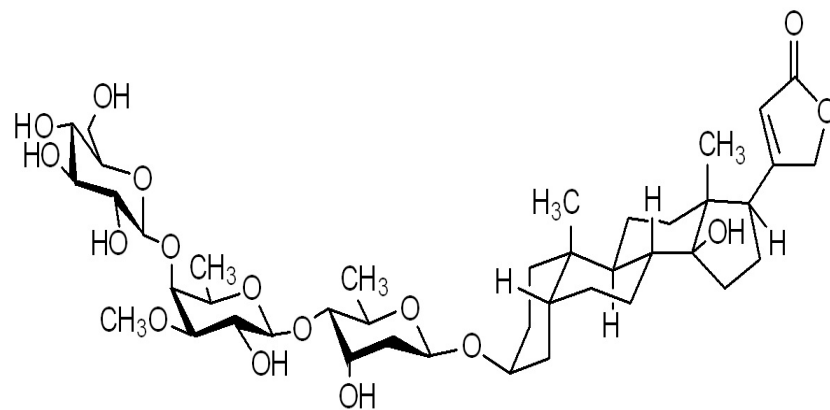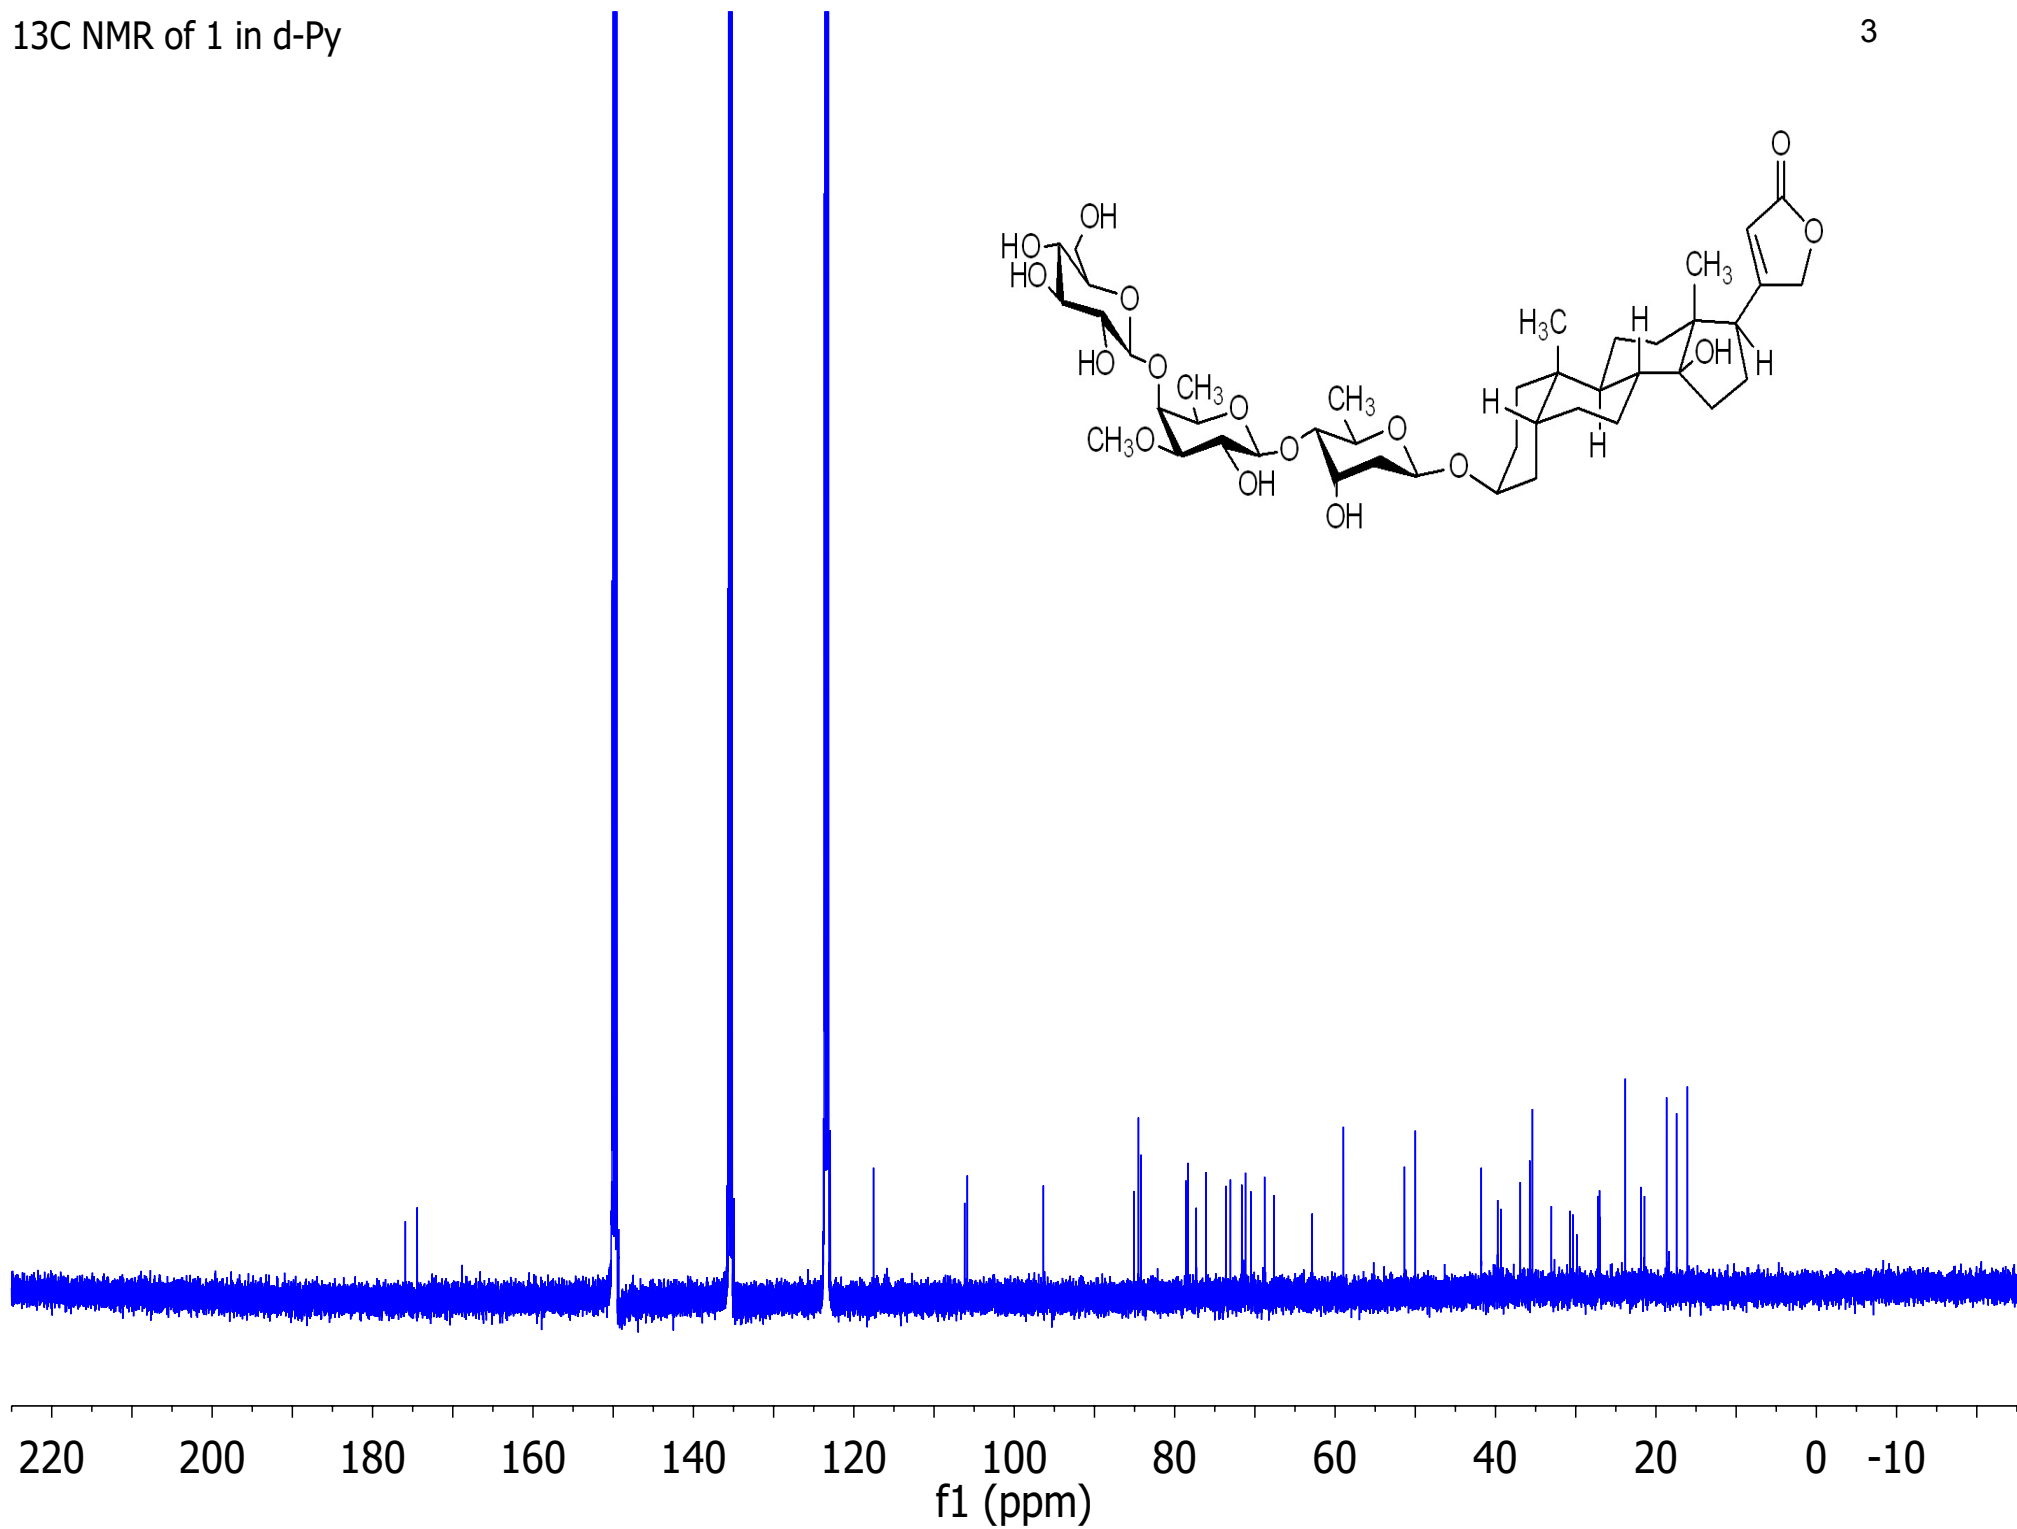

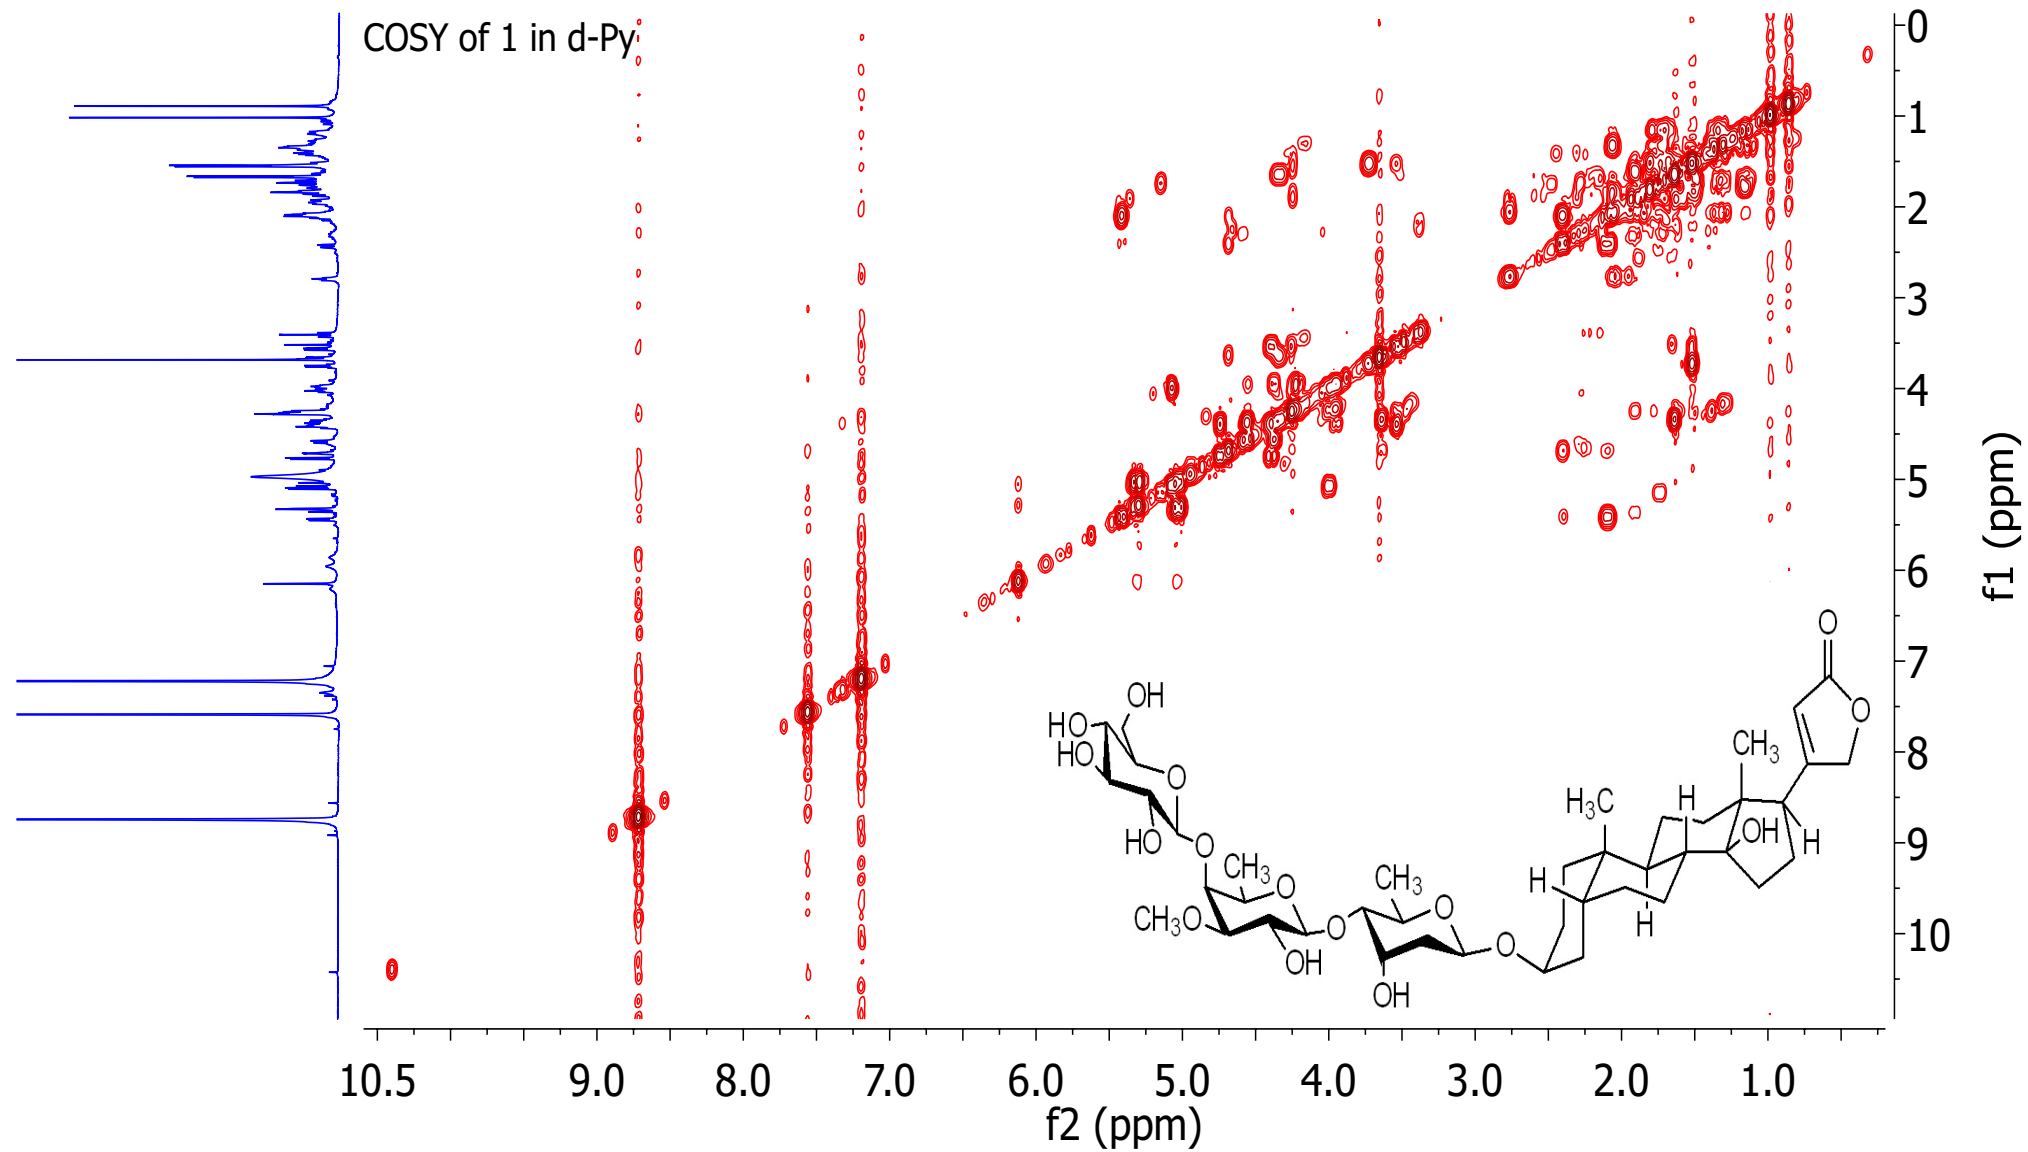

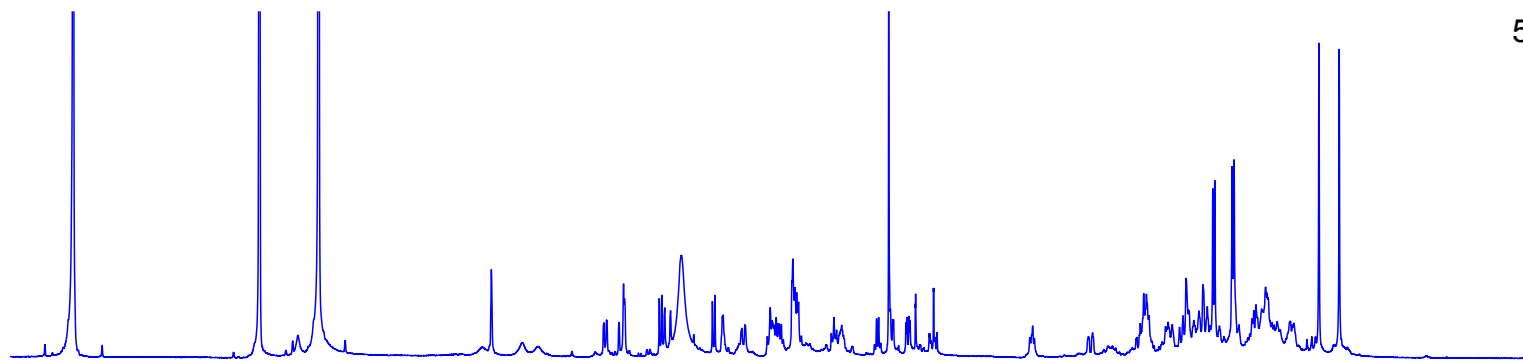

HMQC of 1 in d-Py

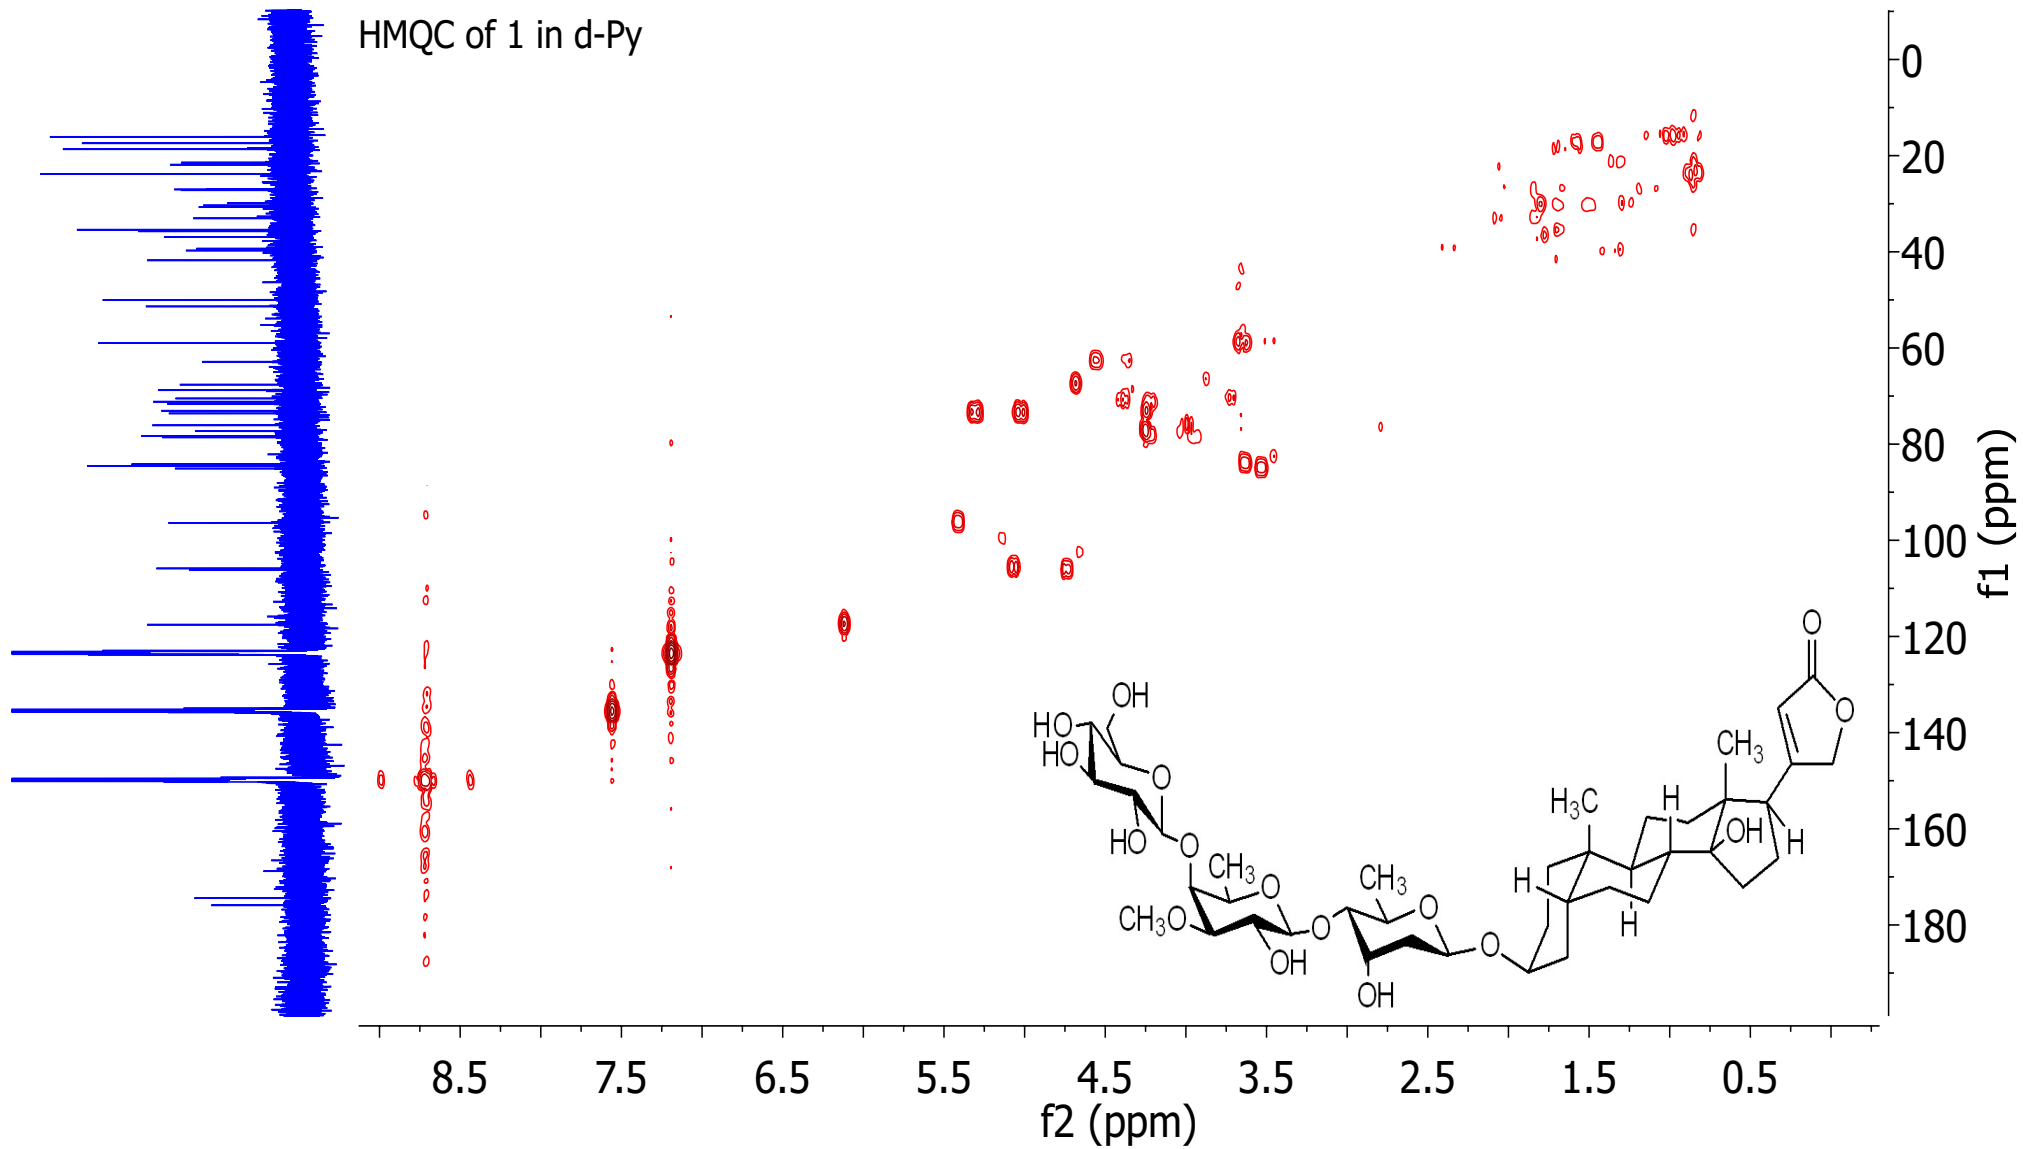

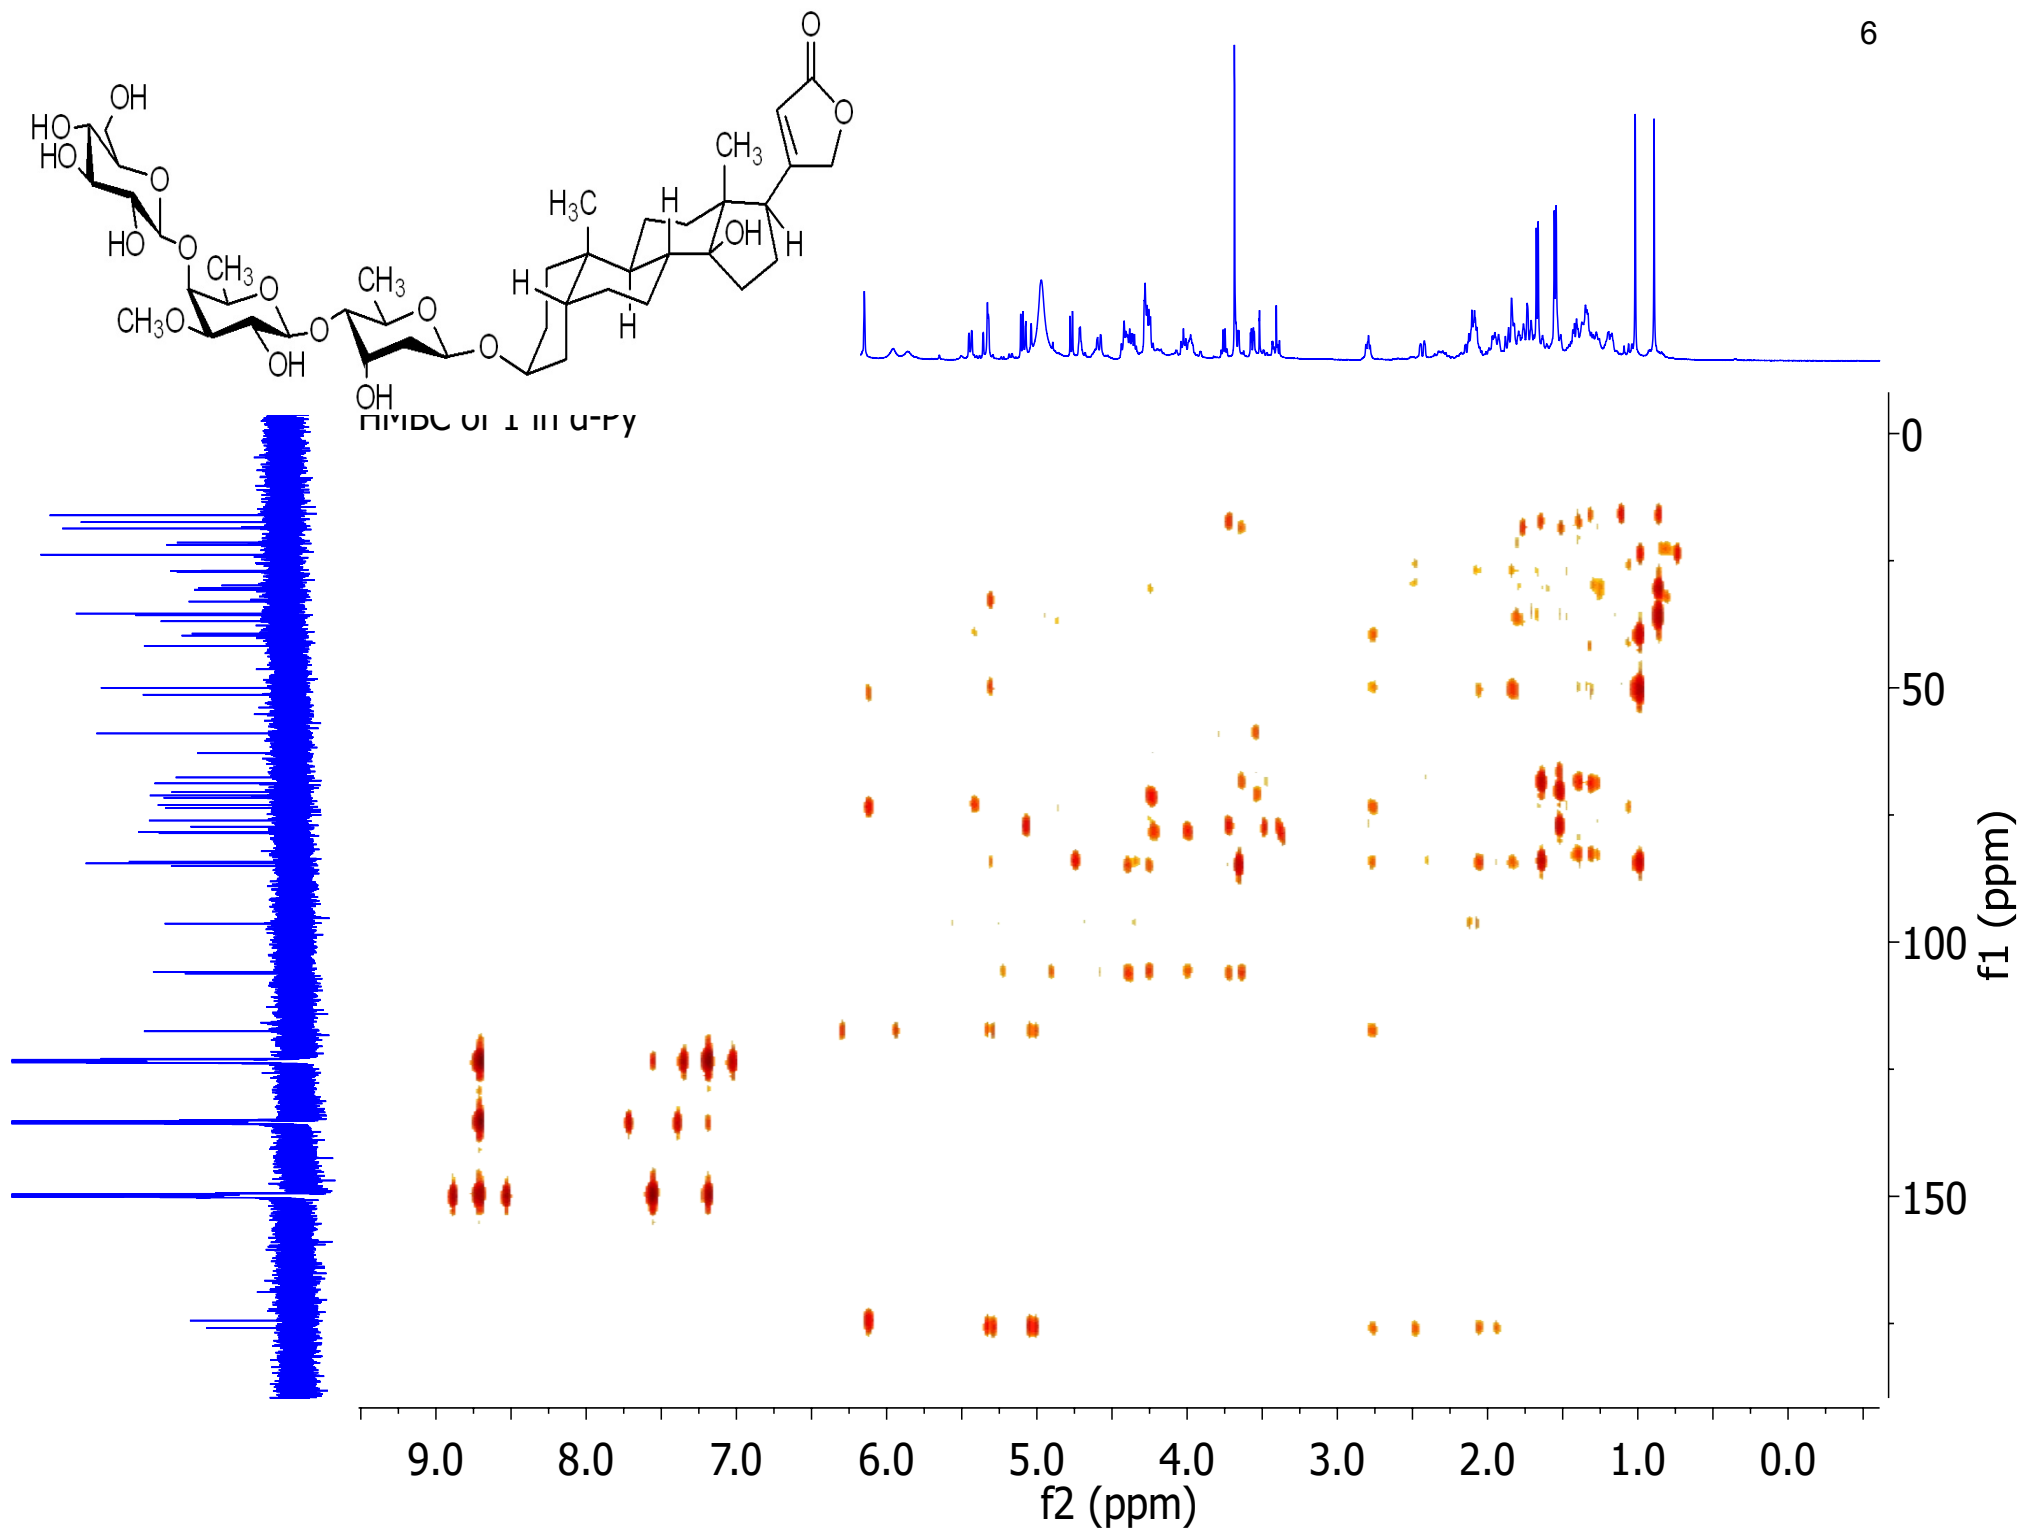

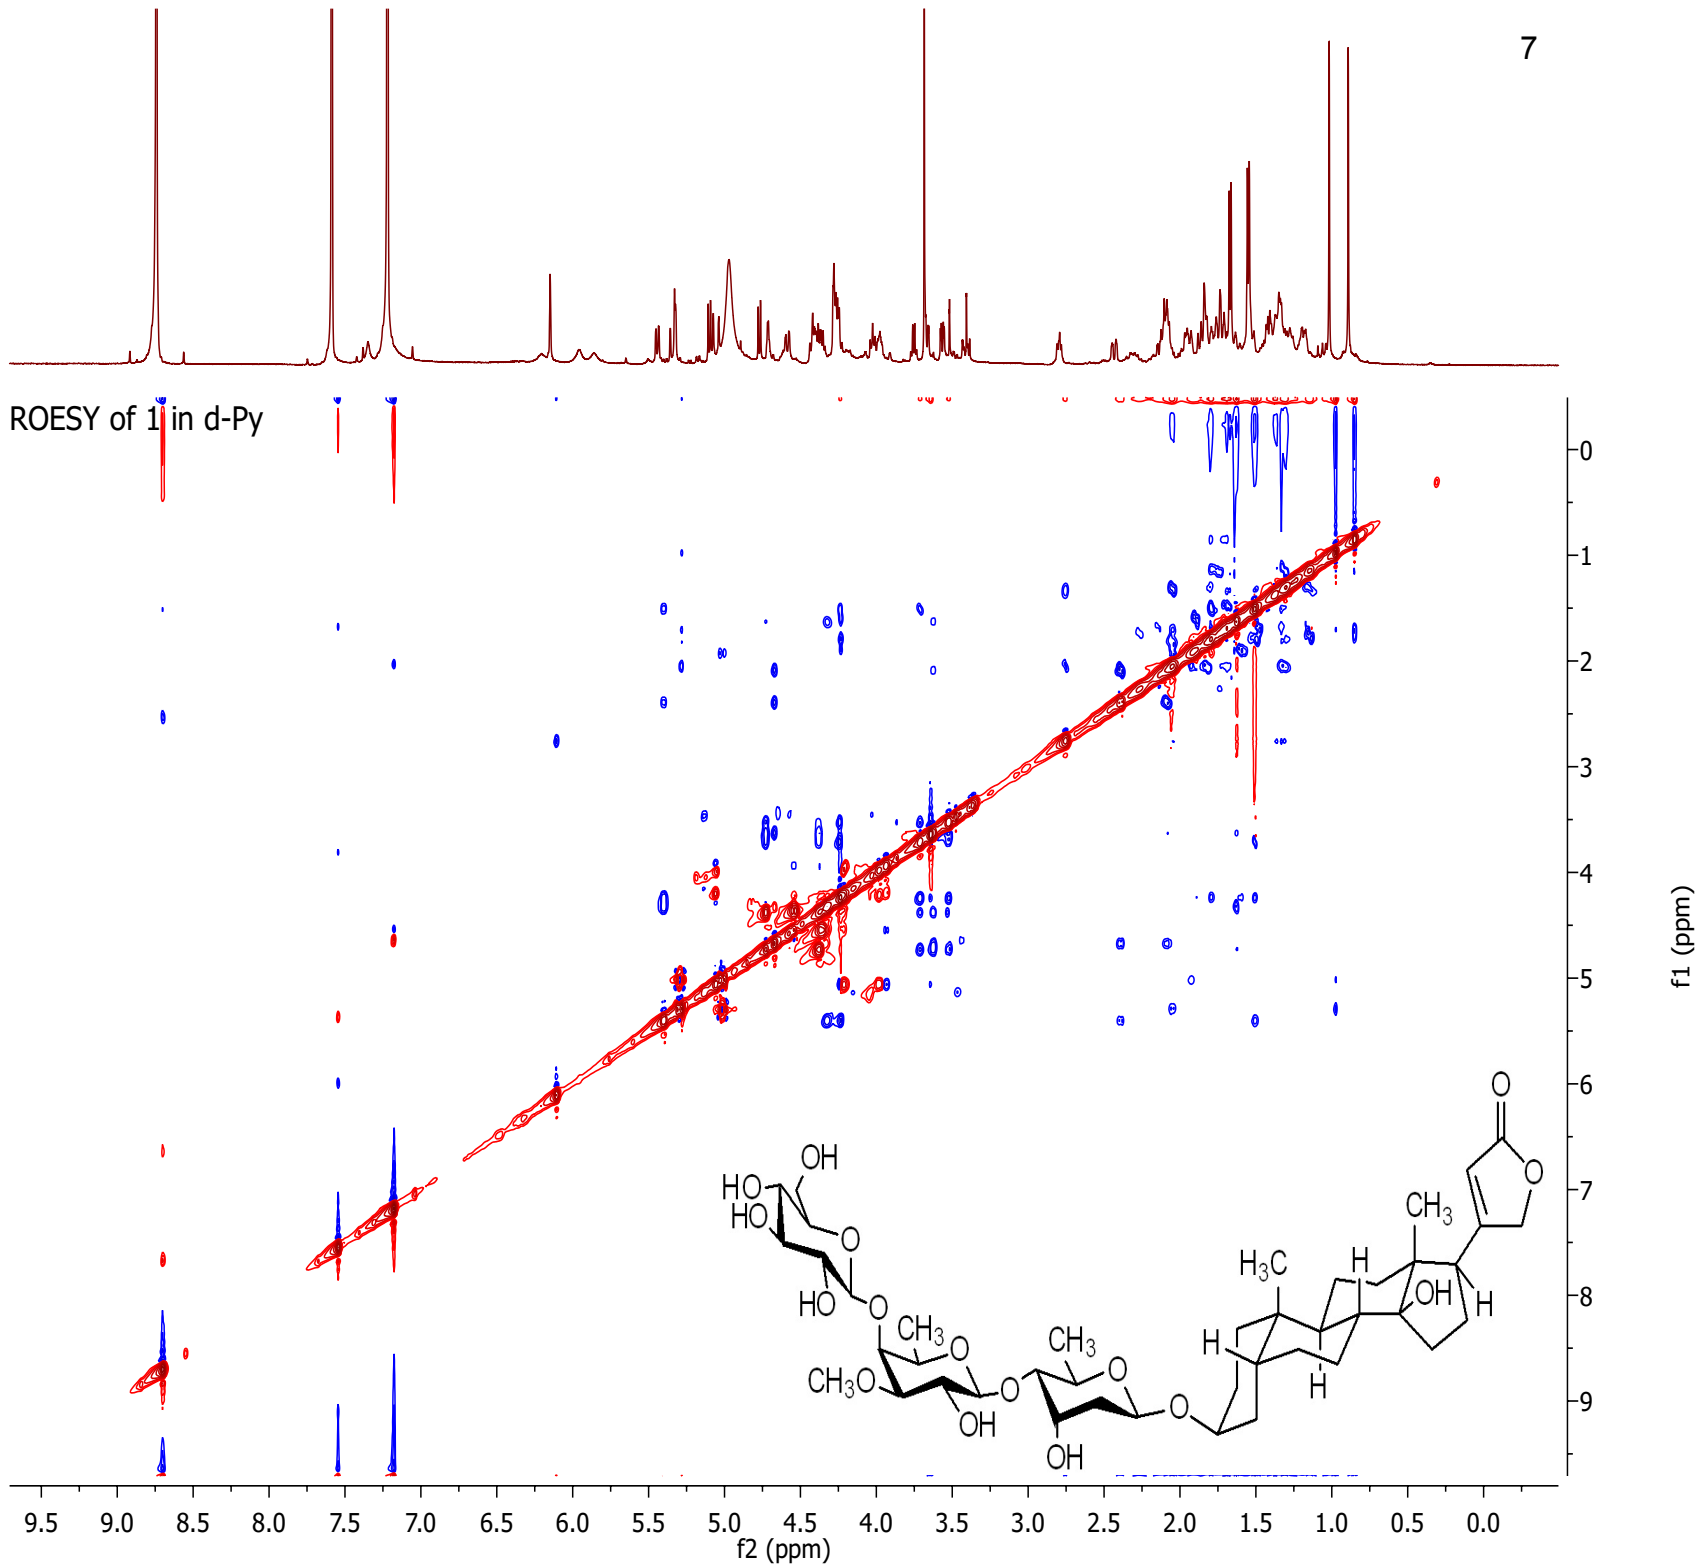

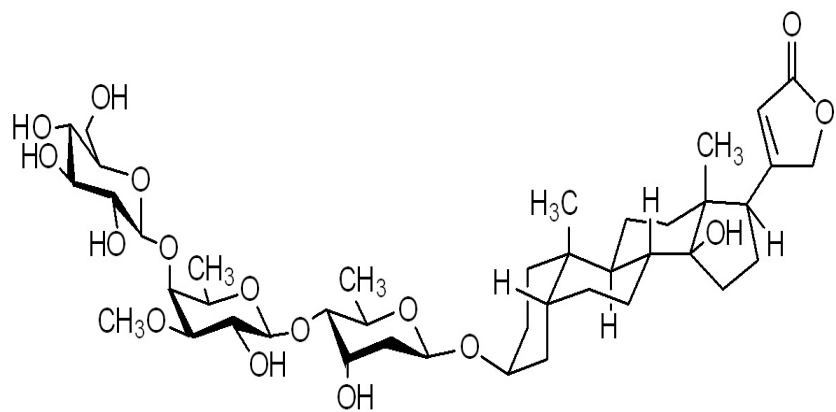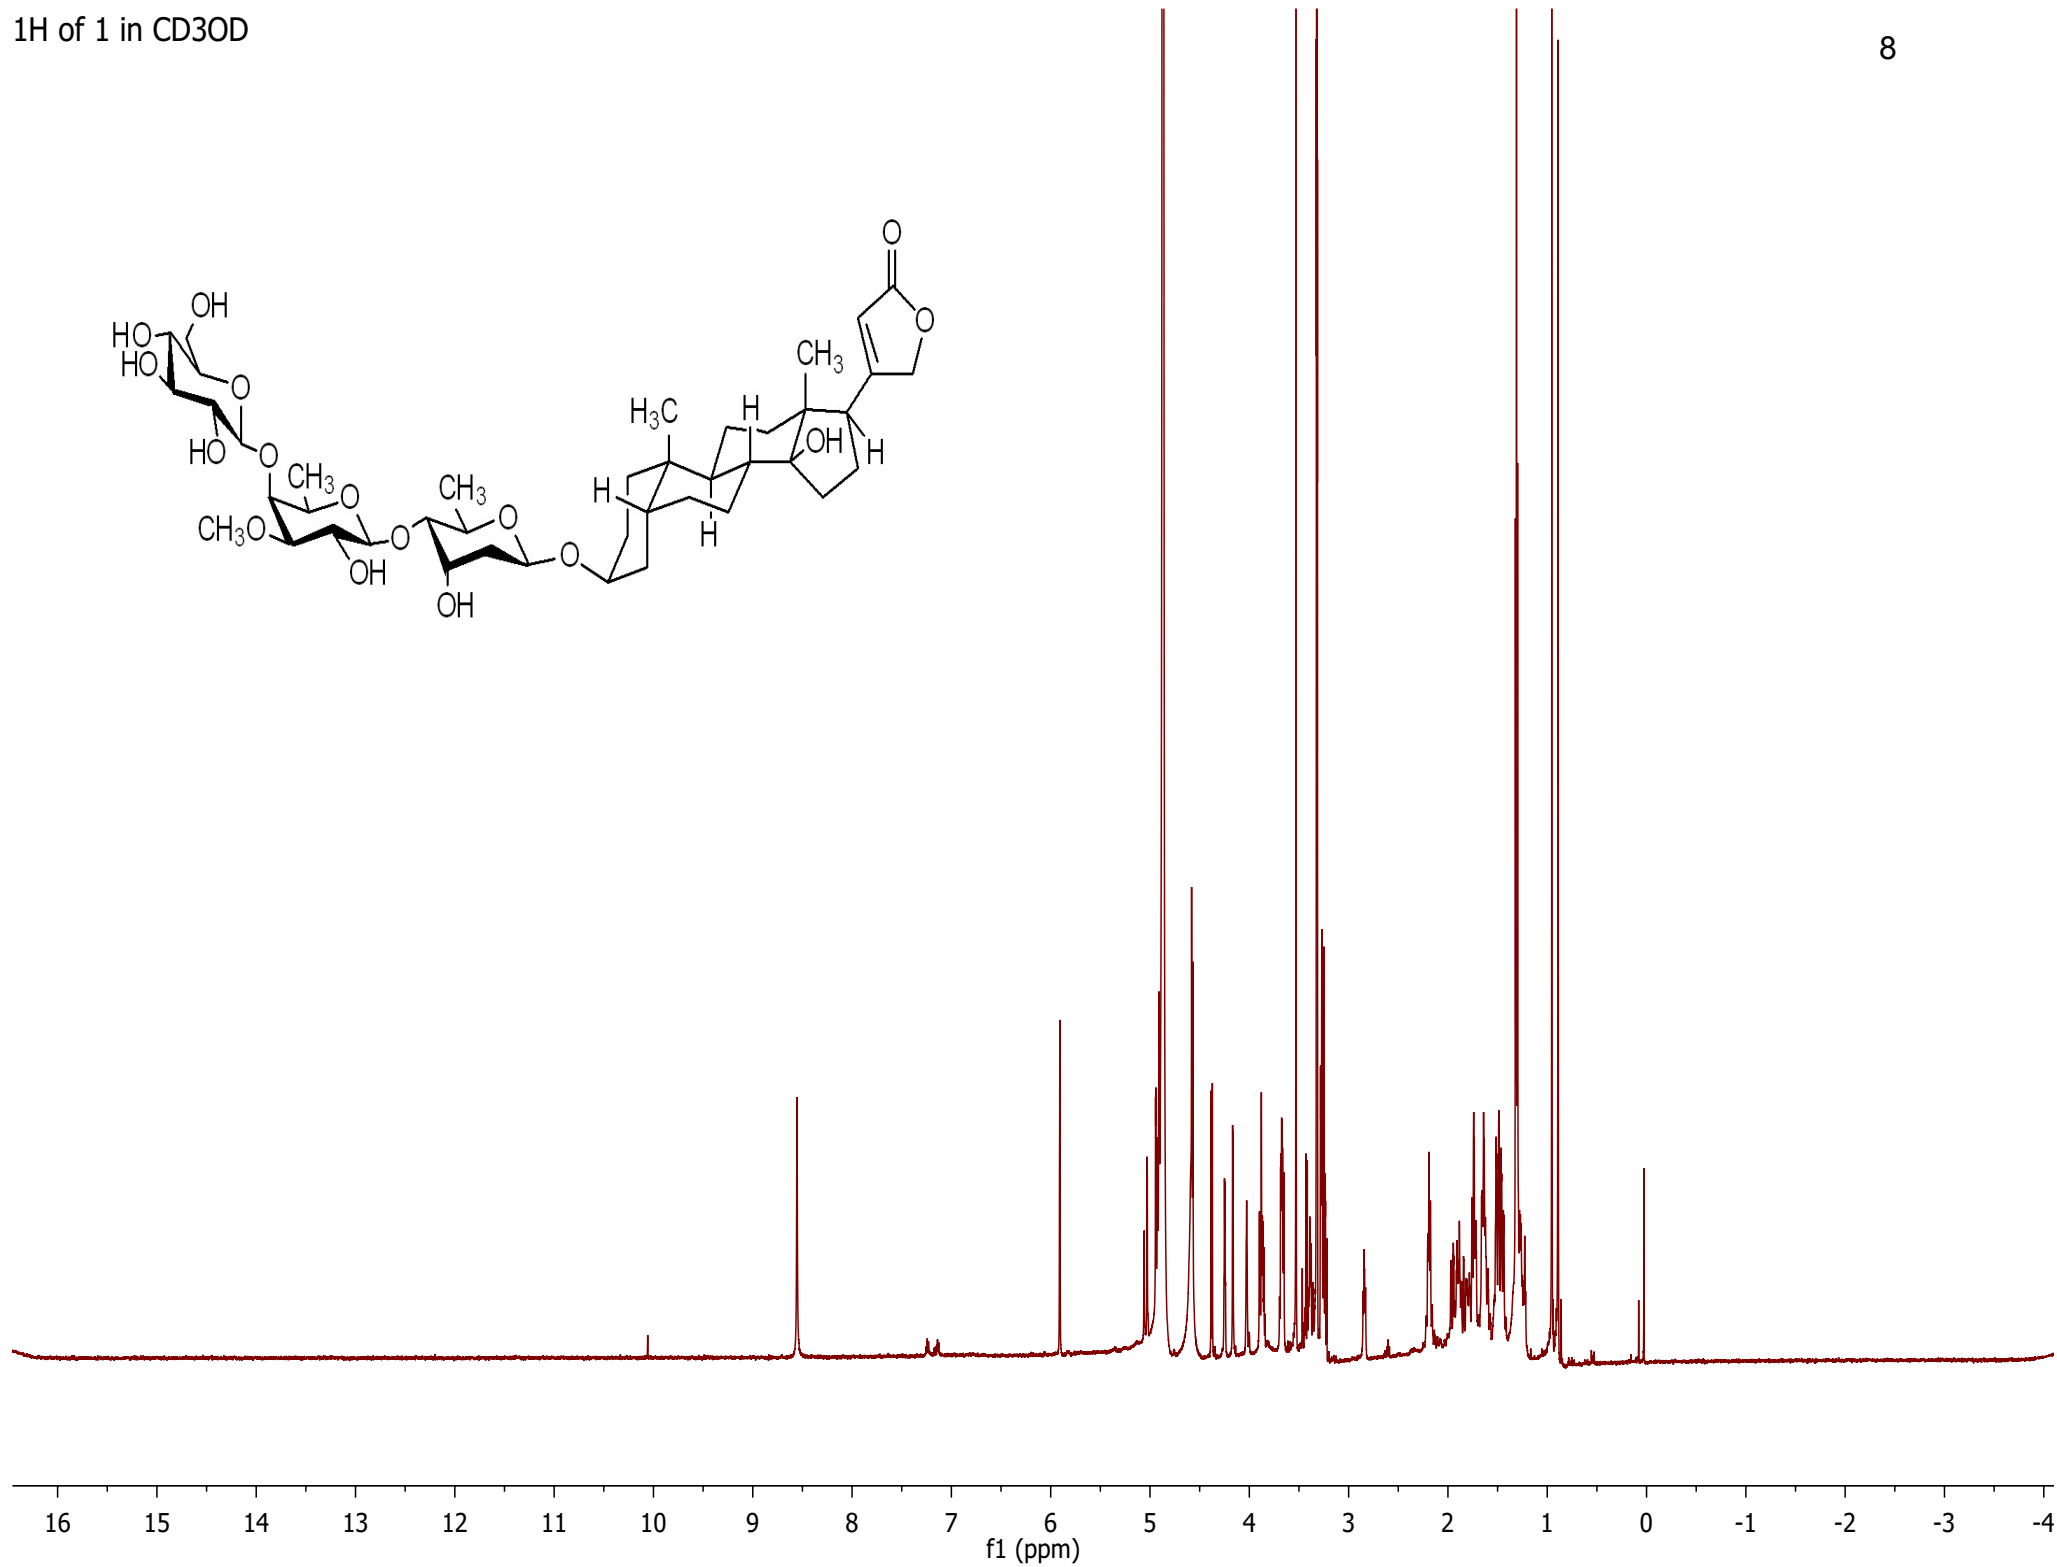



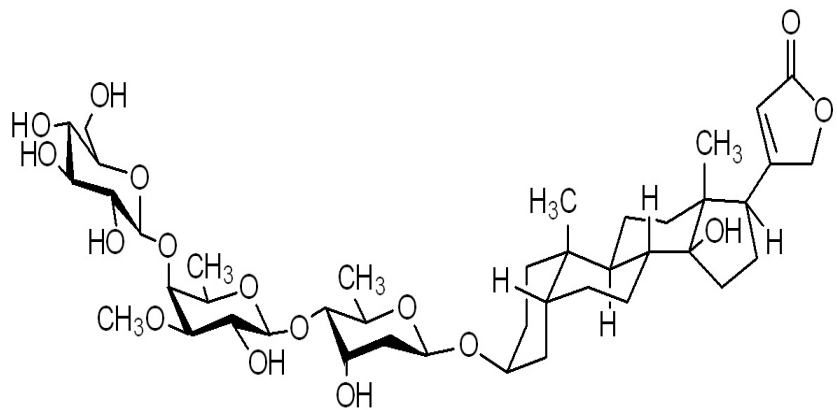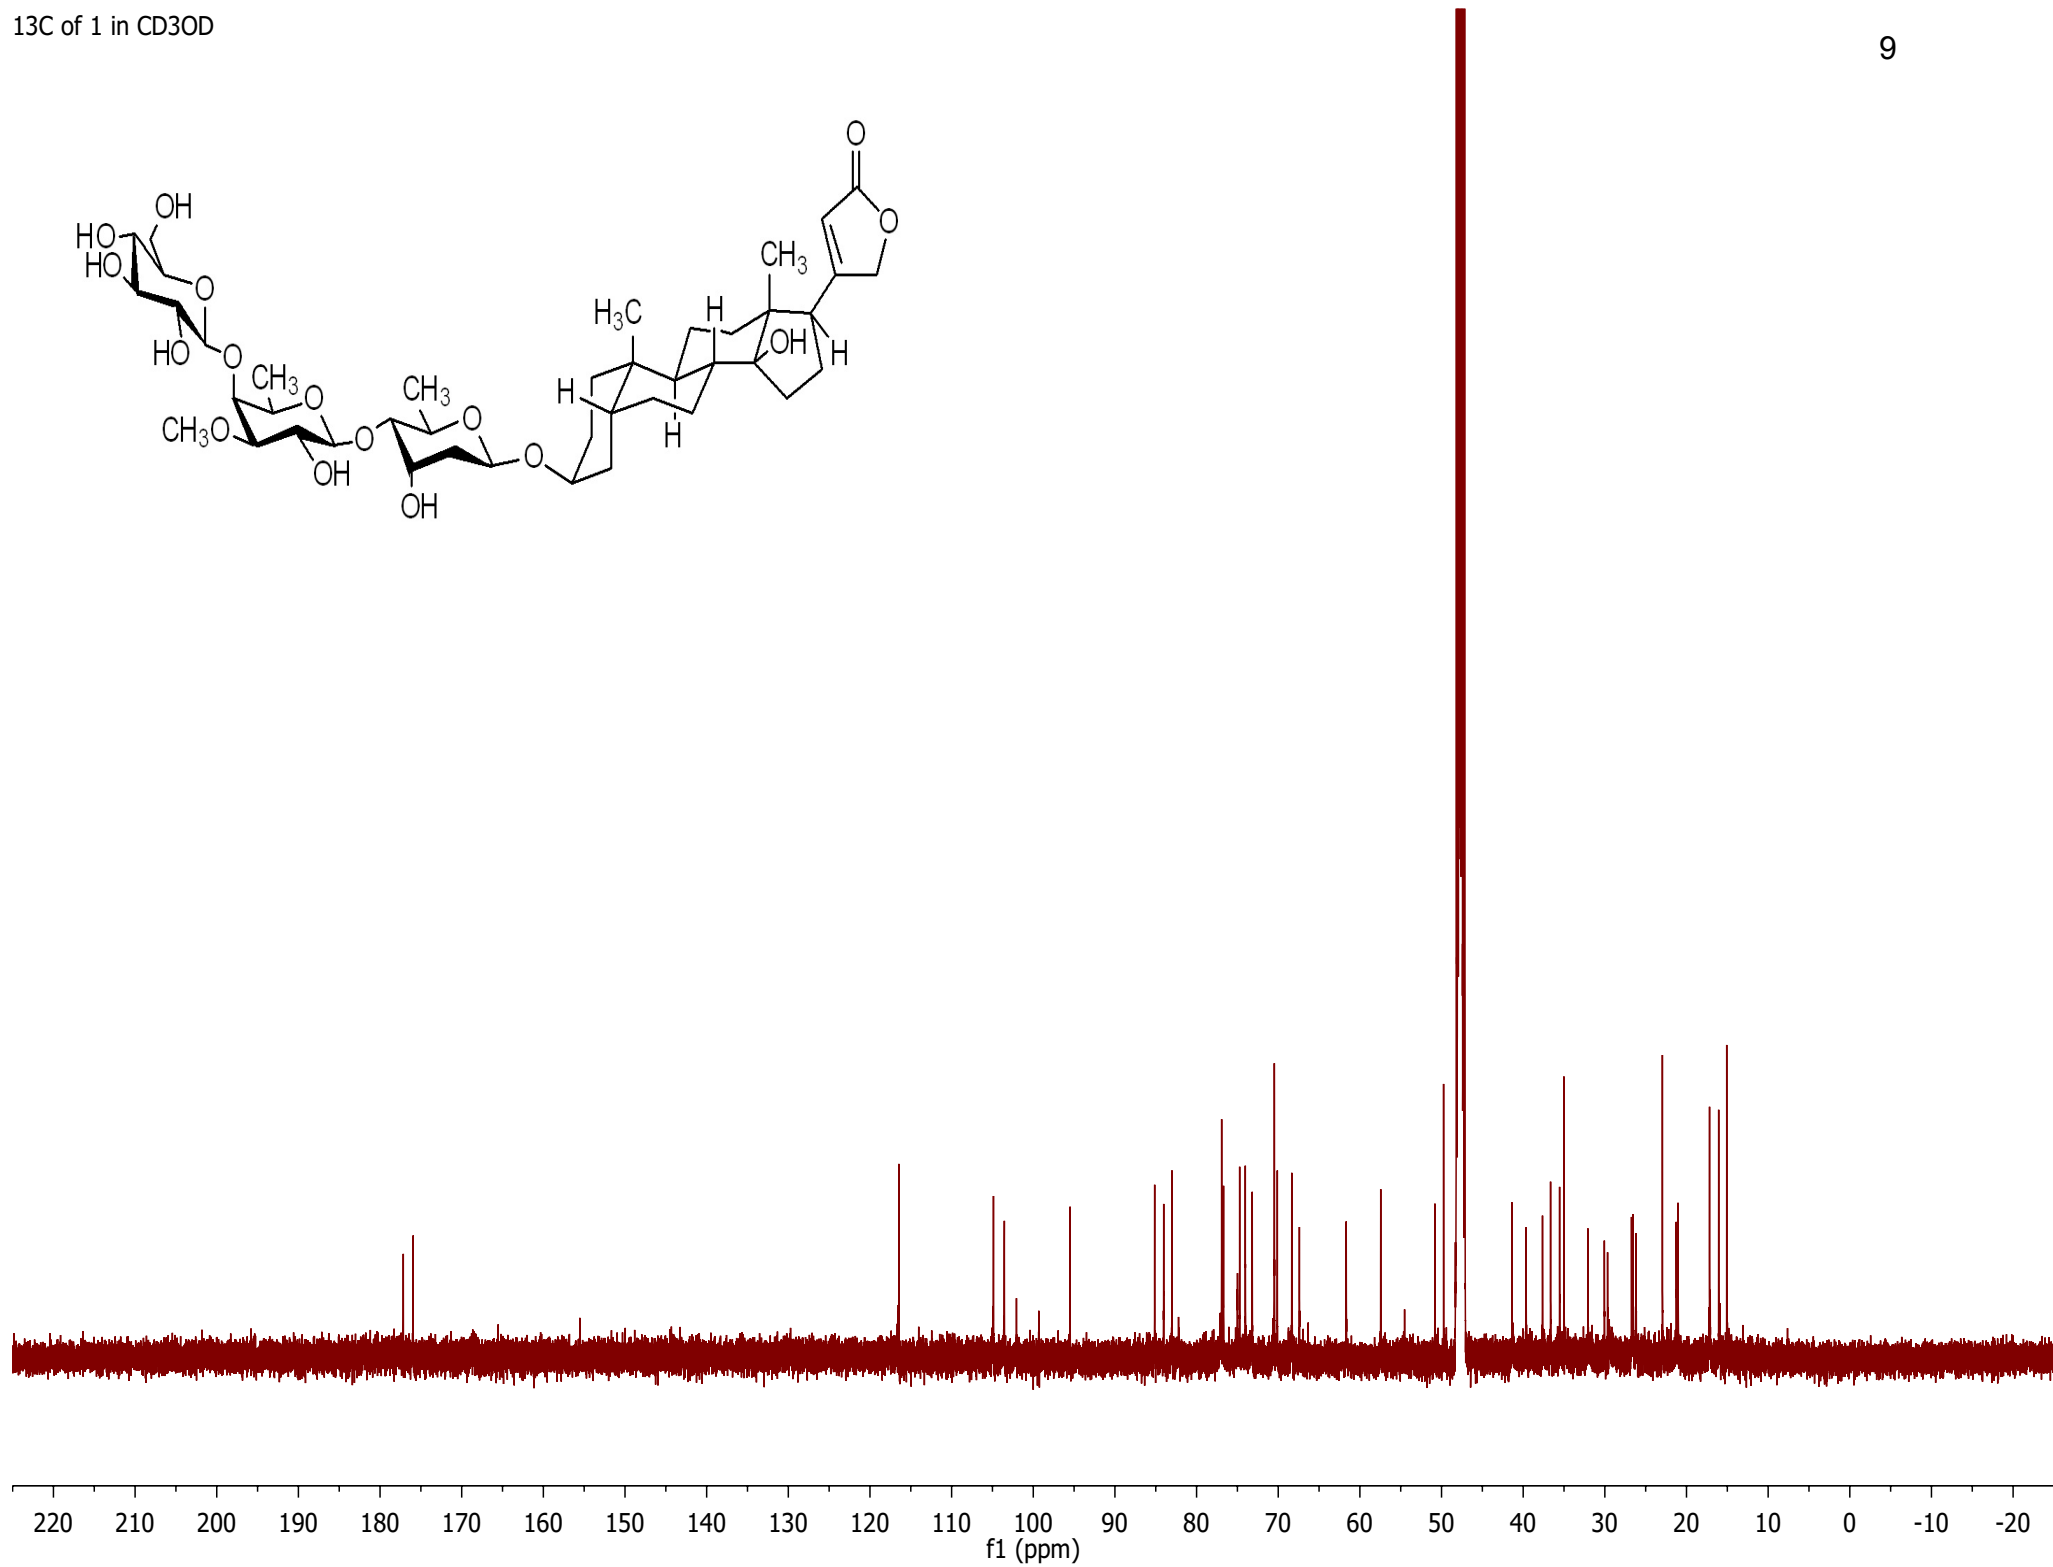

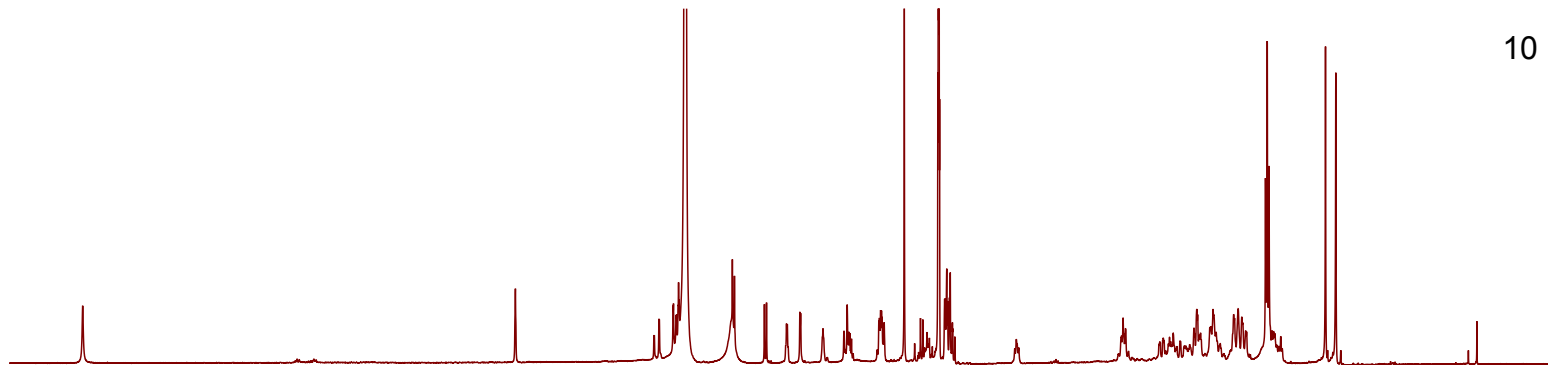

COSY of 1 in CD3OD

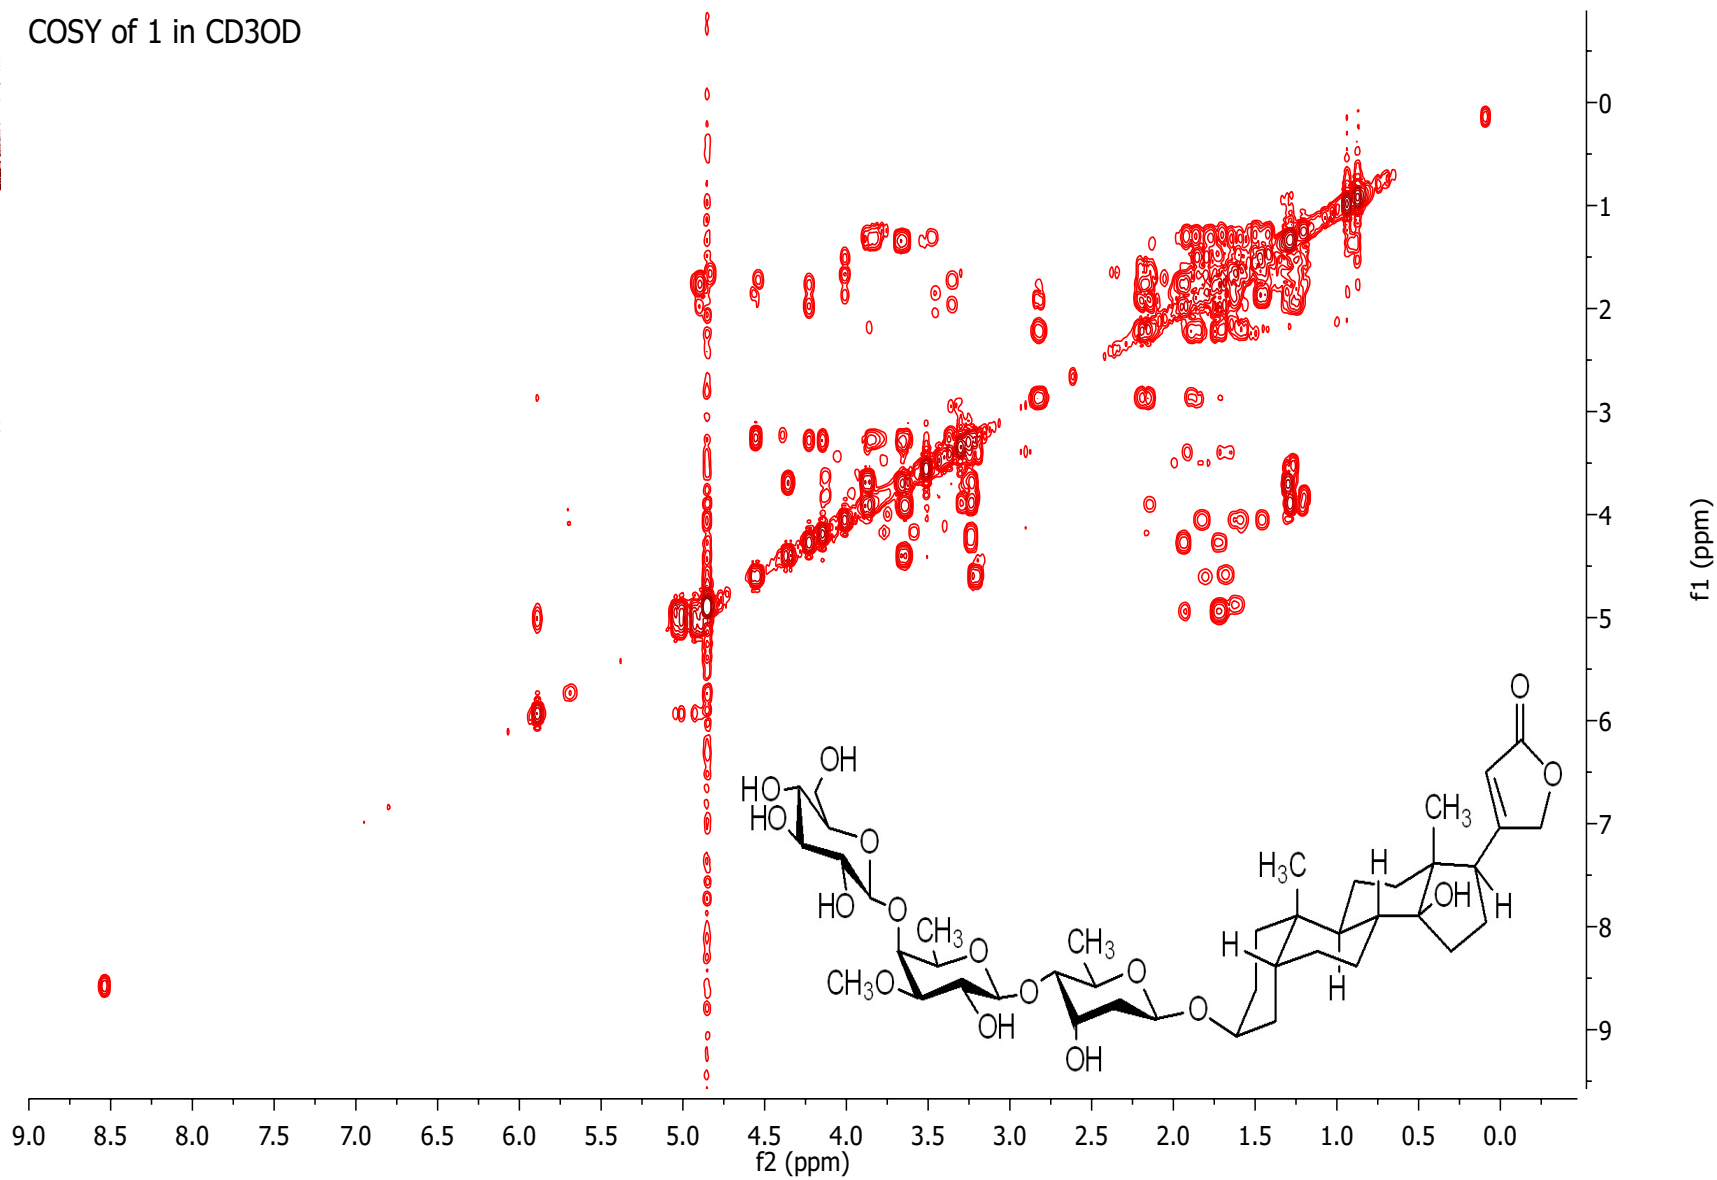

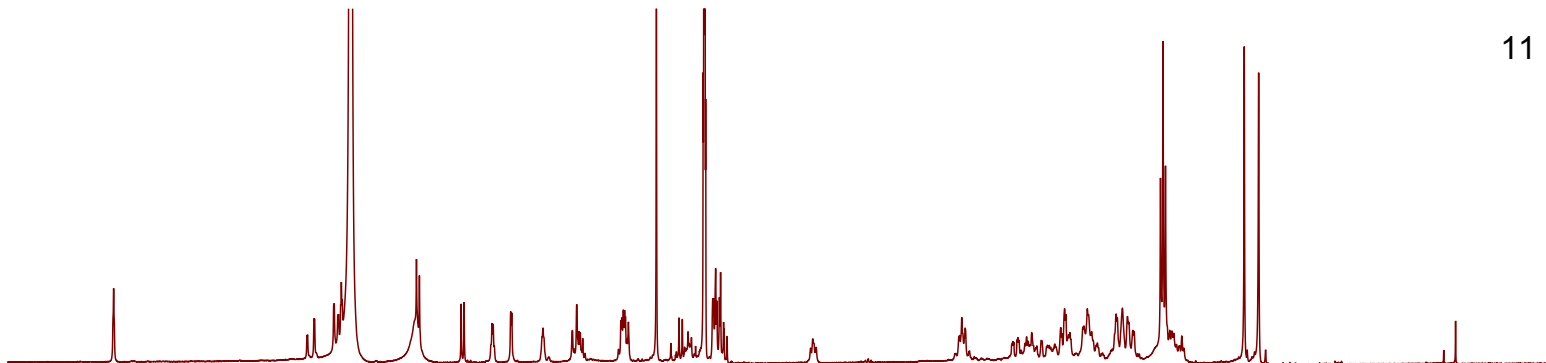

HSQC of 1 in CD3OD

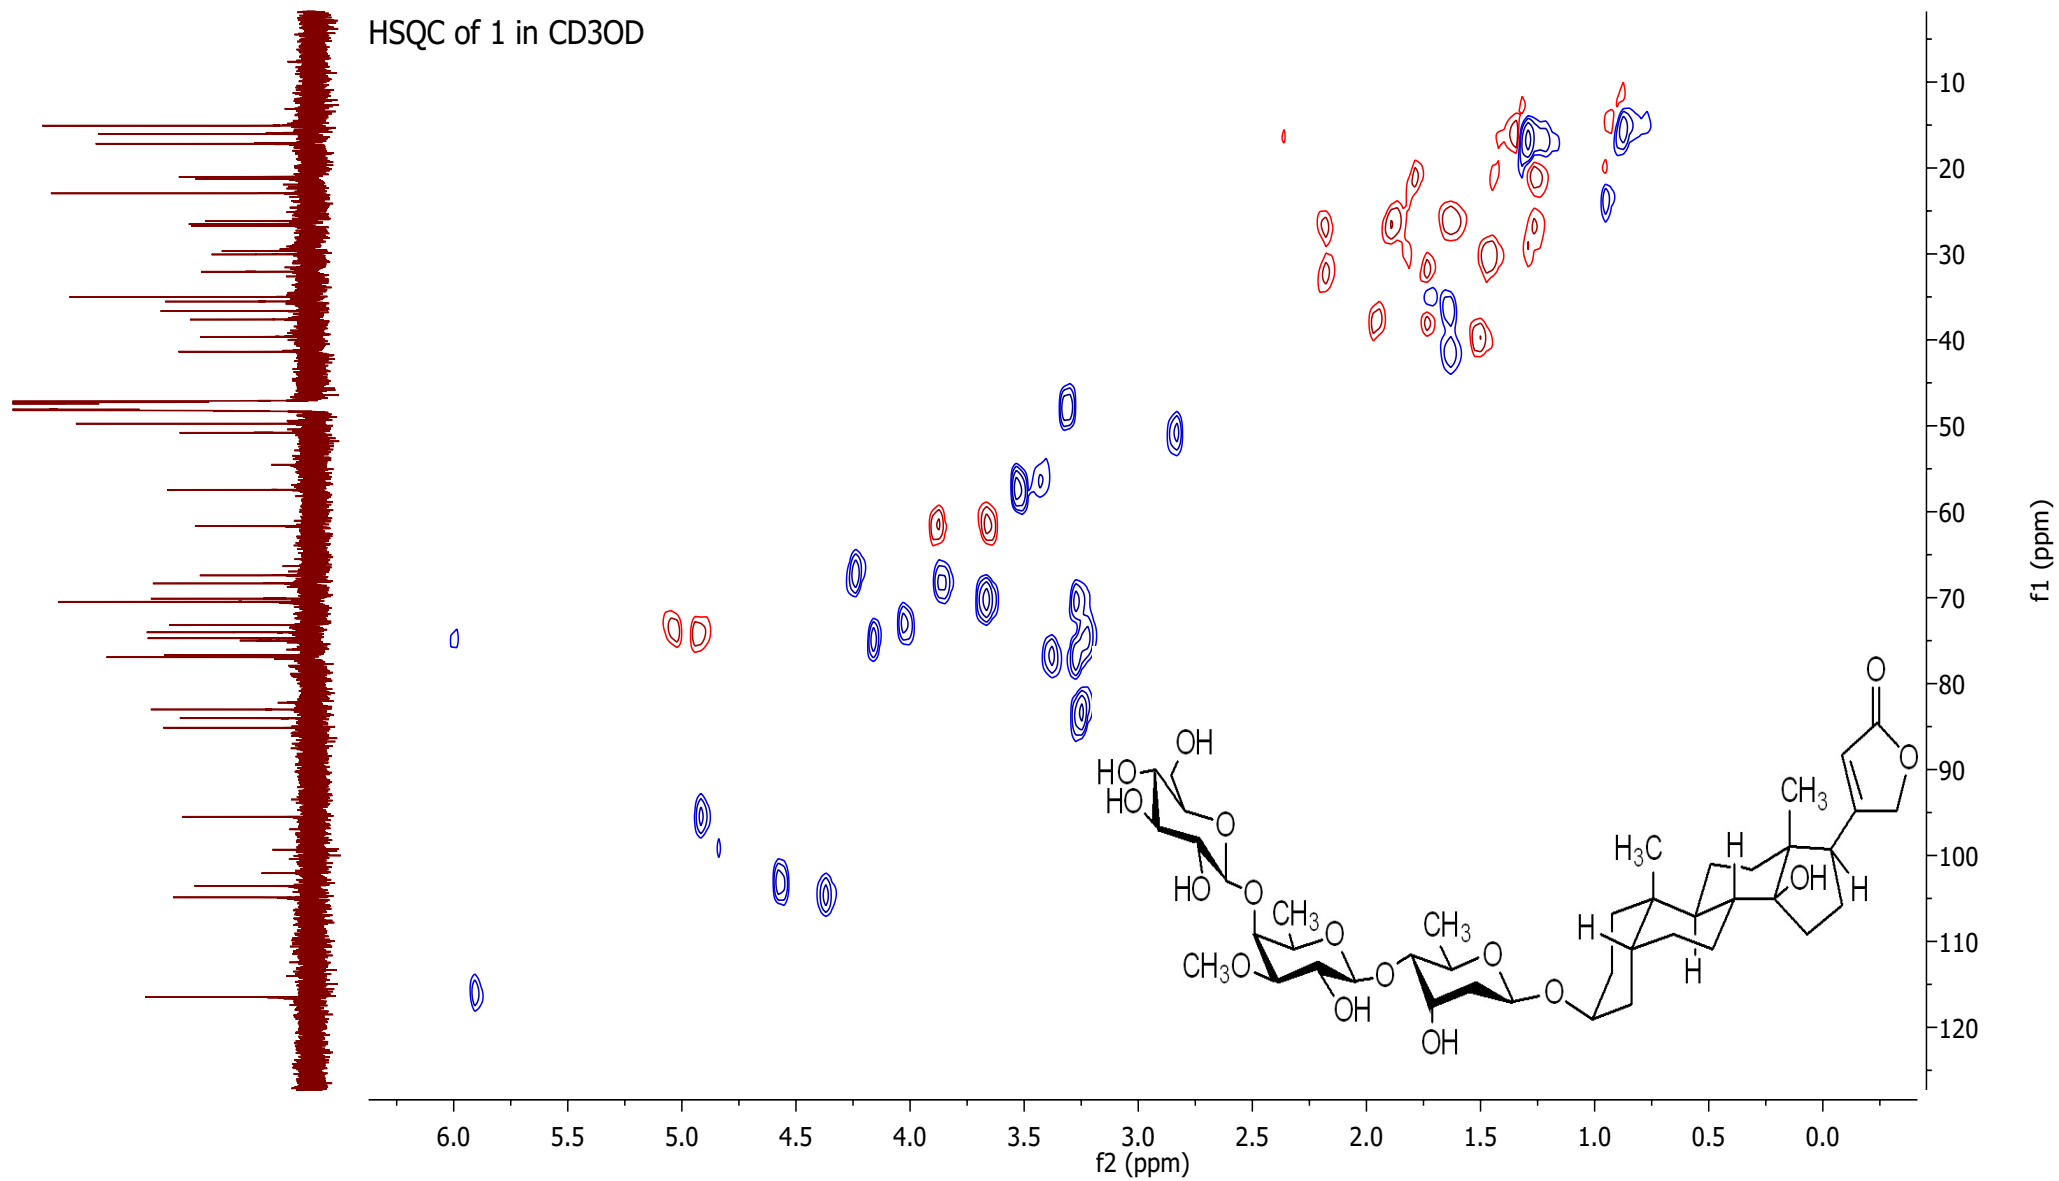

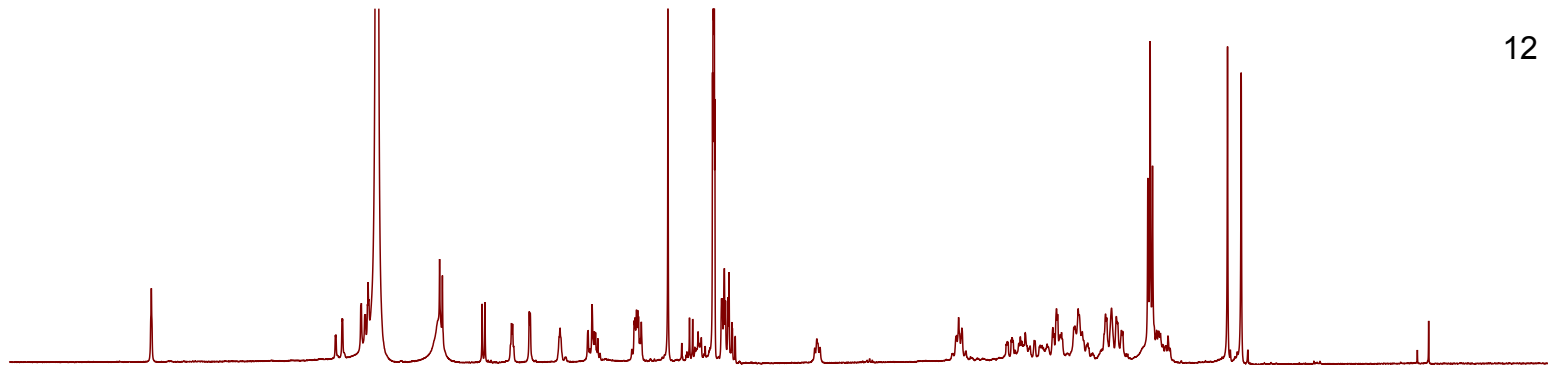

HMBC of 1 in CD3OD

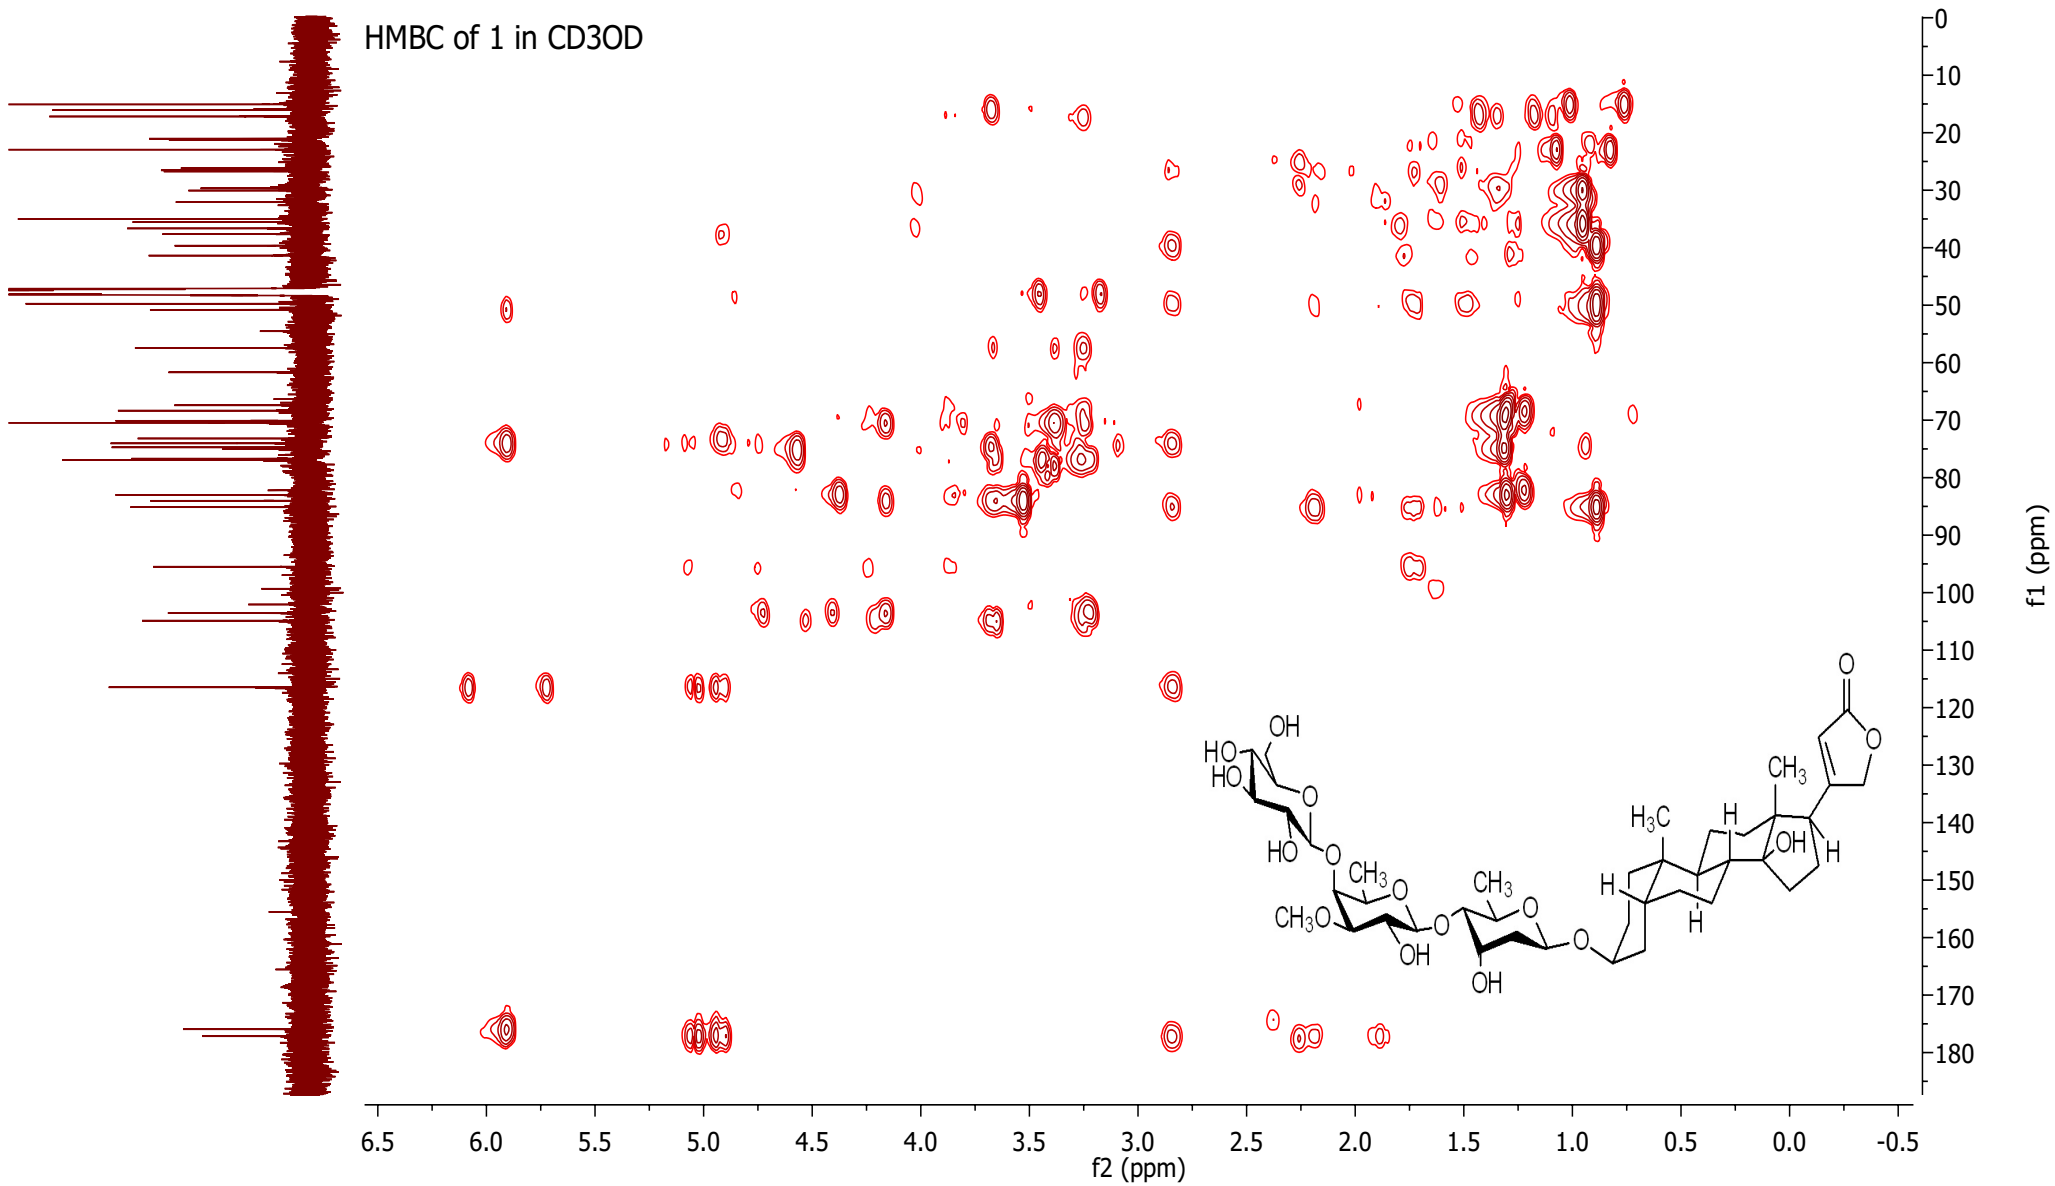

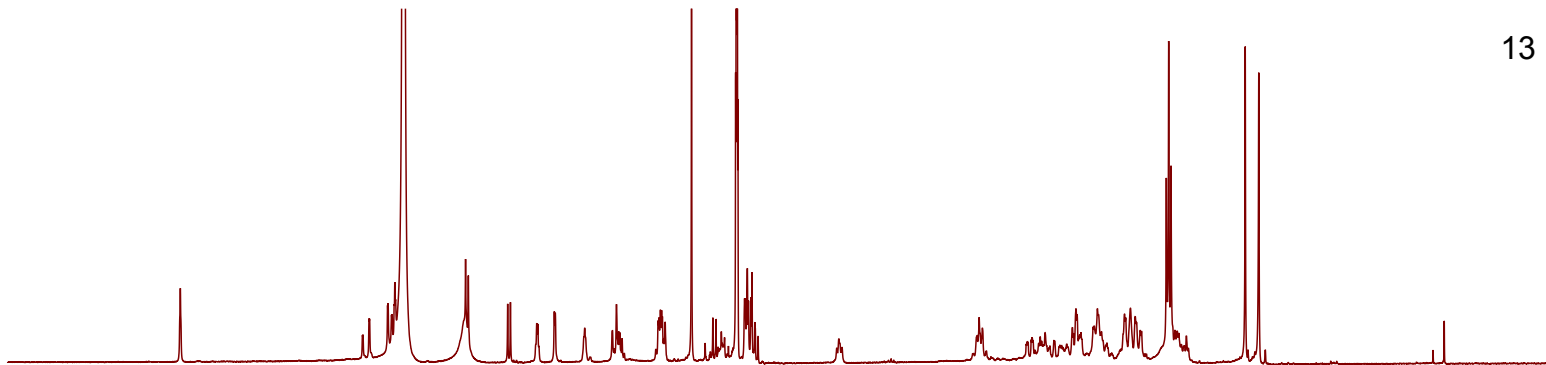

TOSCY of 1 in CD3OD

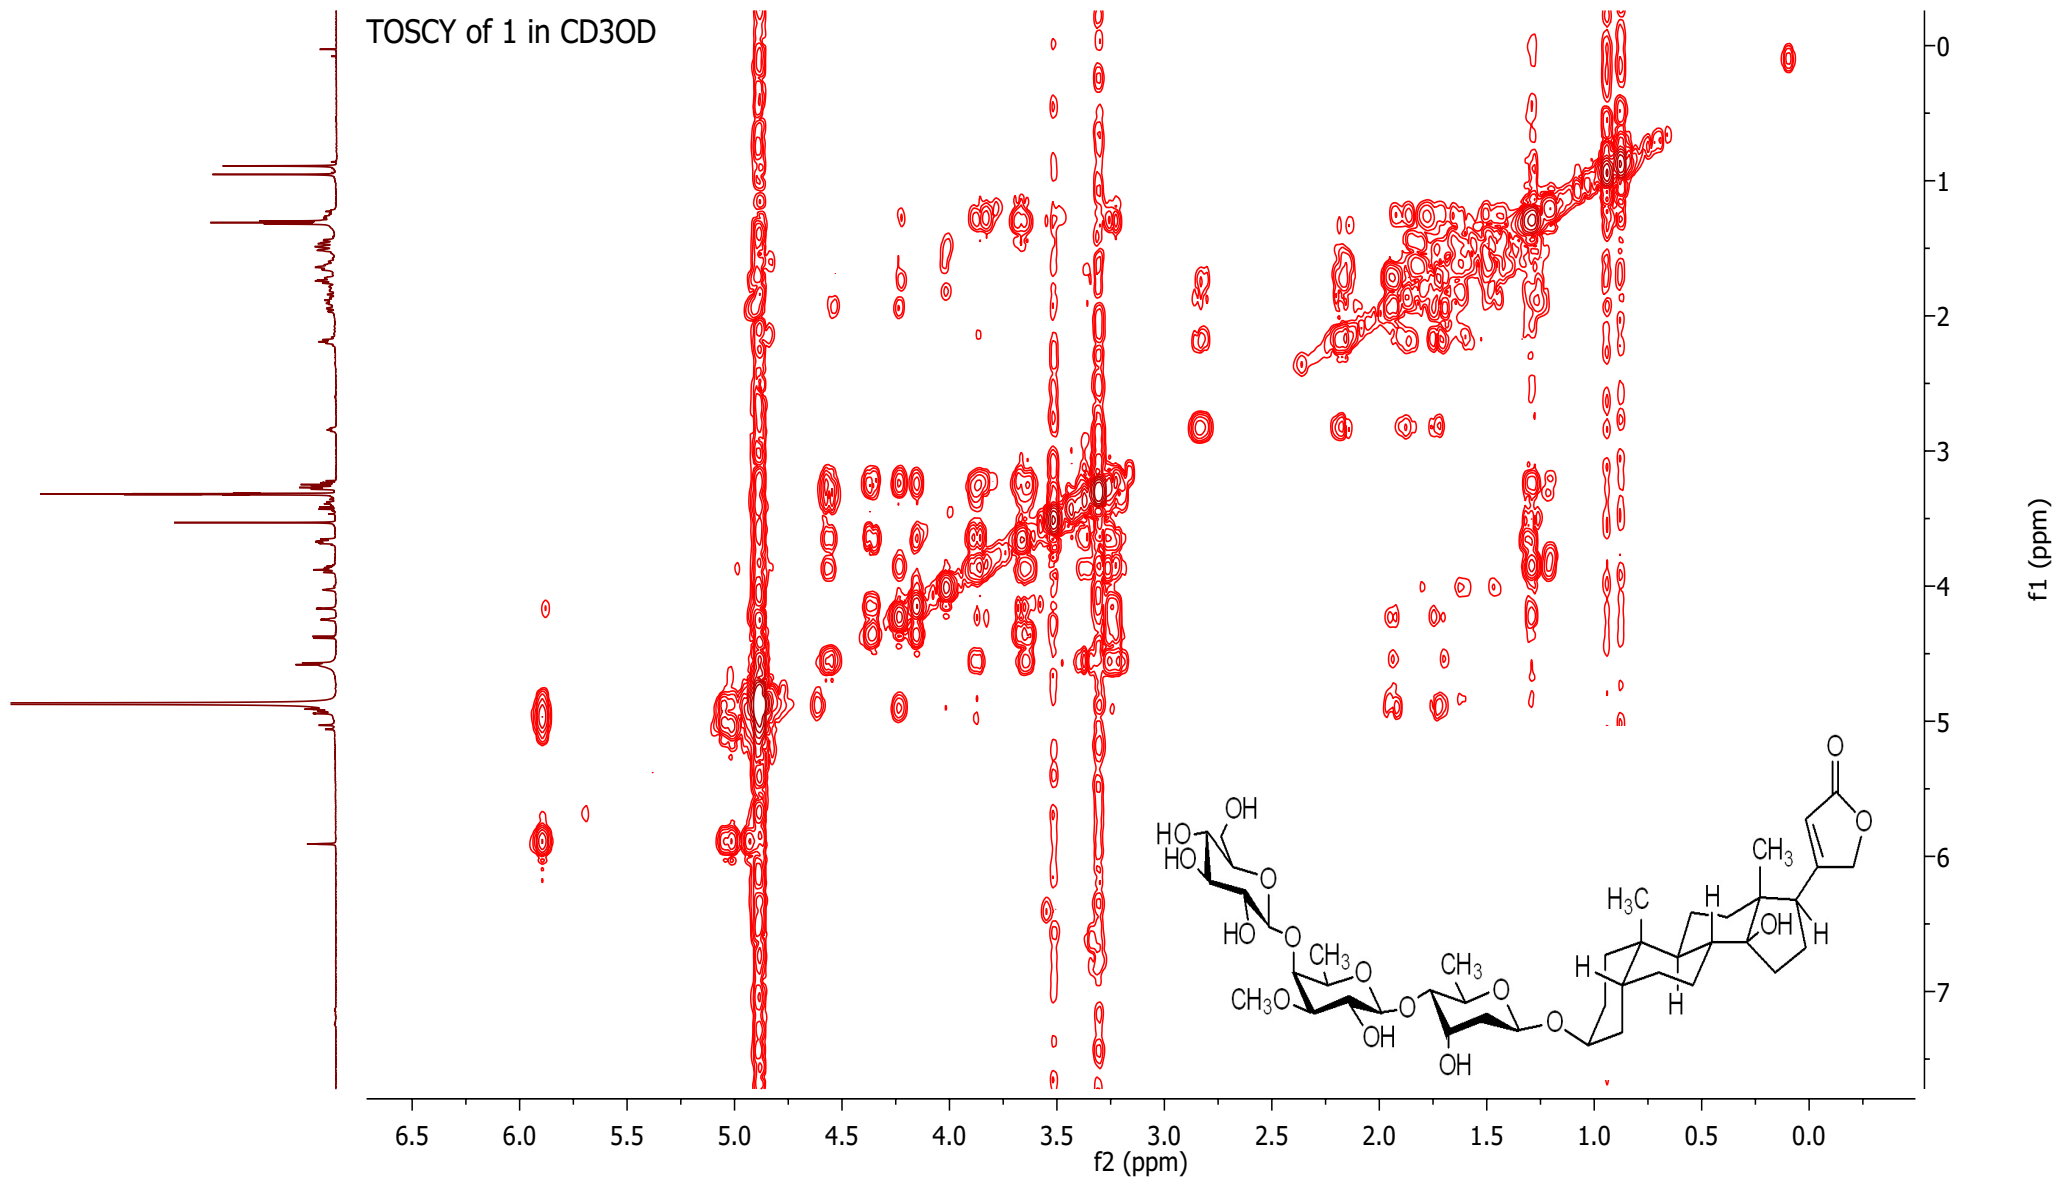

ROESY of 1 in CD3OD

14

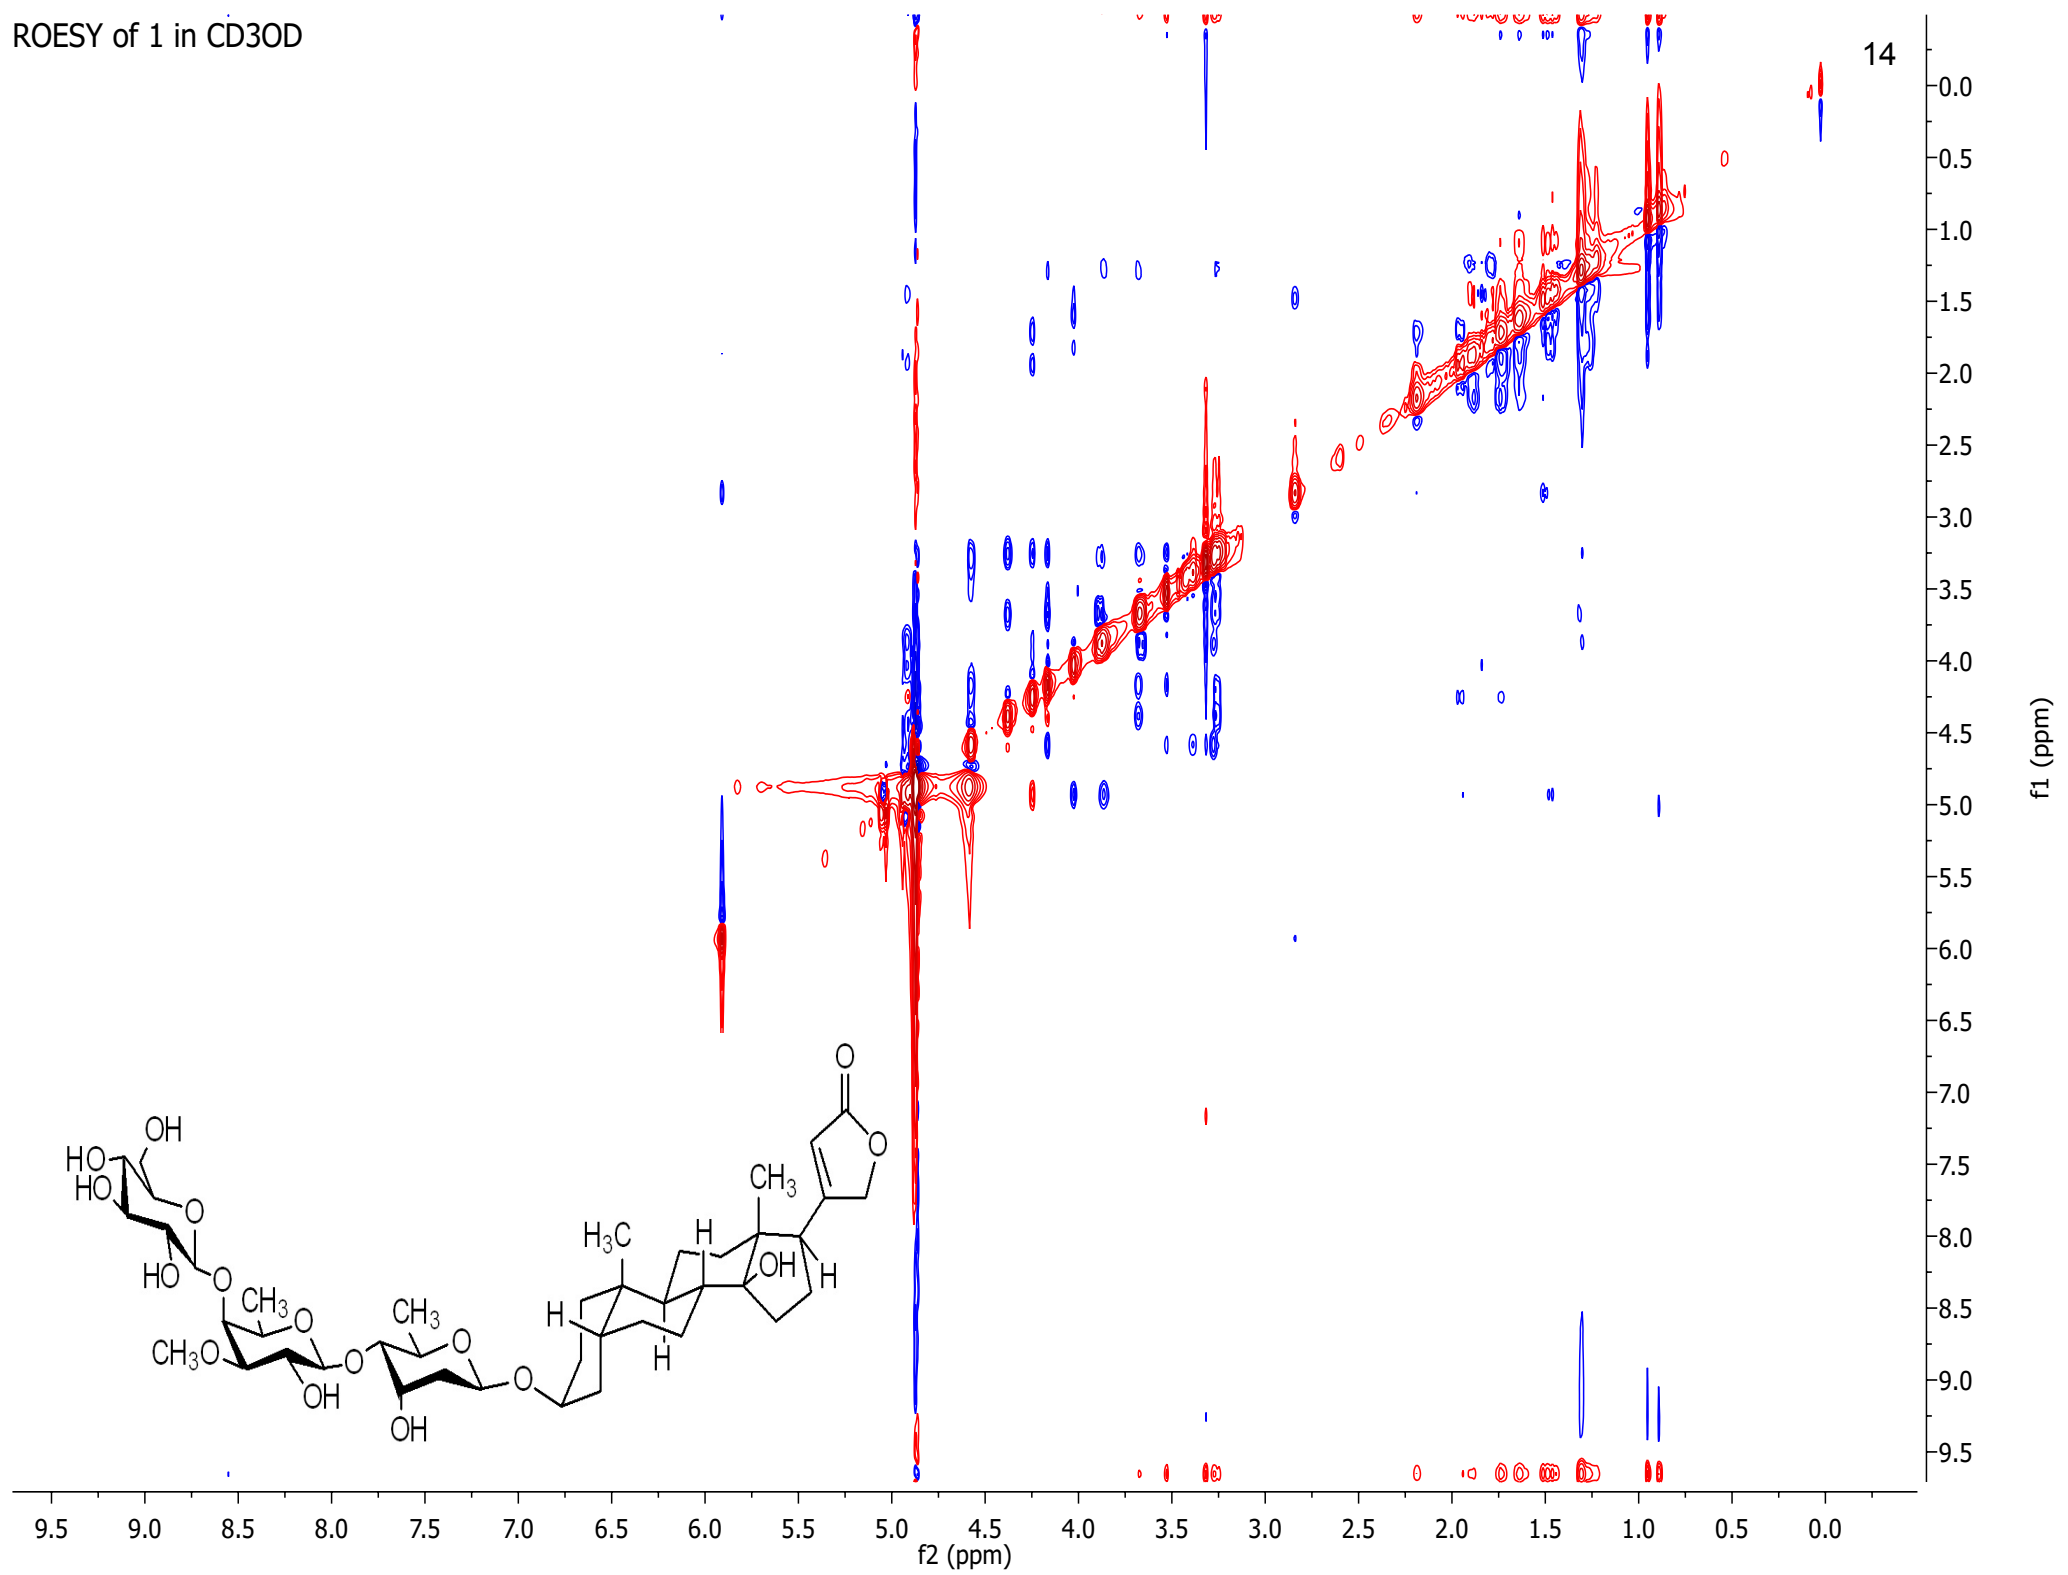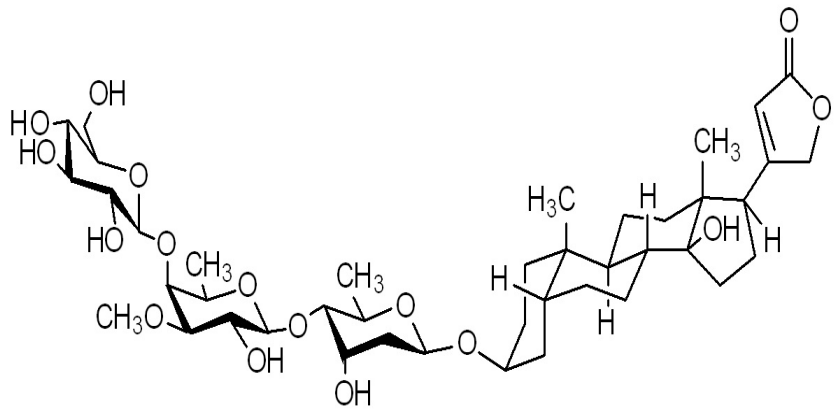

9.5 9.0 8.5 8.0 7.5 7.0 6.5 6.0 5.5 5.0 4.5 4.0 3.5 3.0 2.5 2.0 1.5 1.0 0.5 0.0

f2 (ppm)

f1 (ppm)

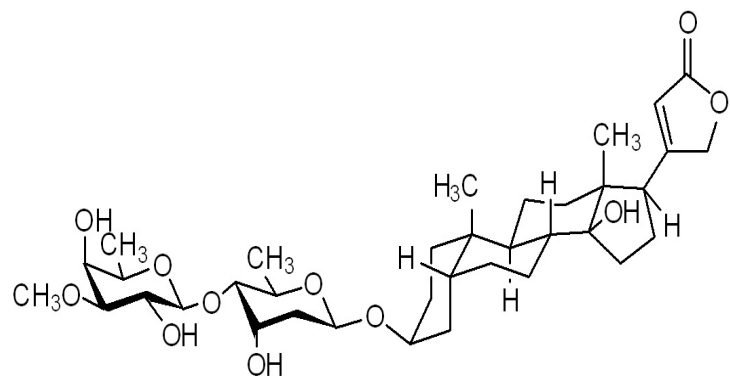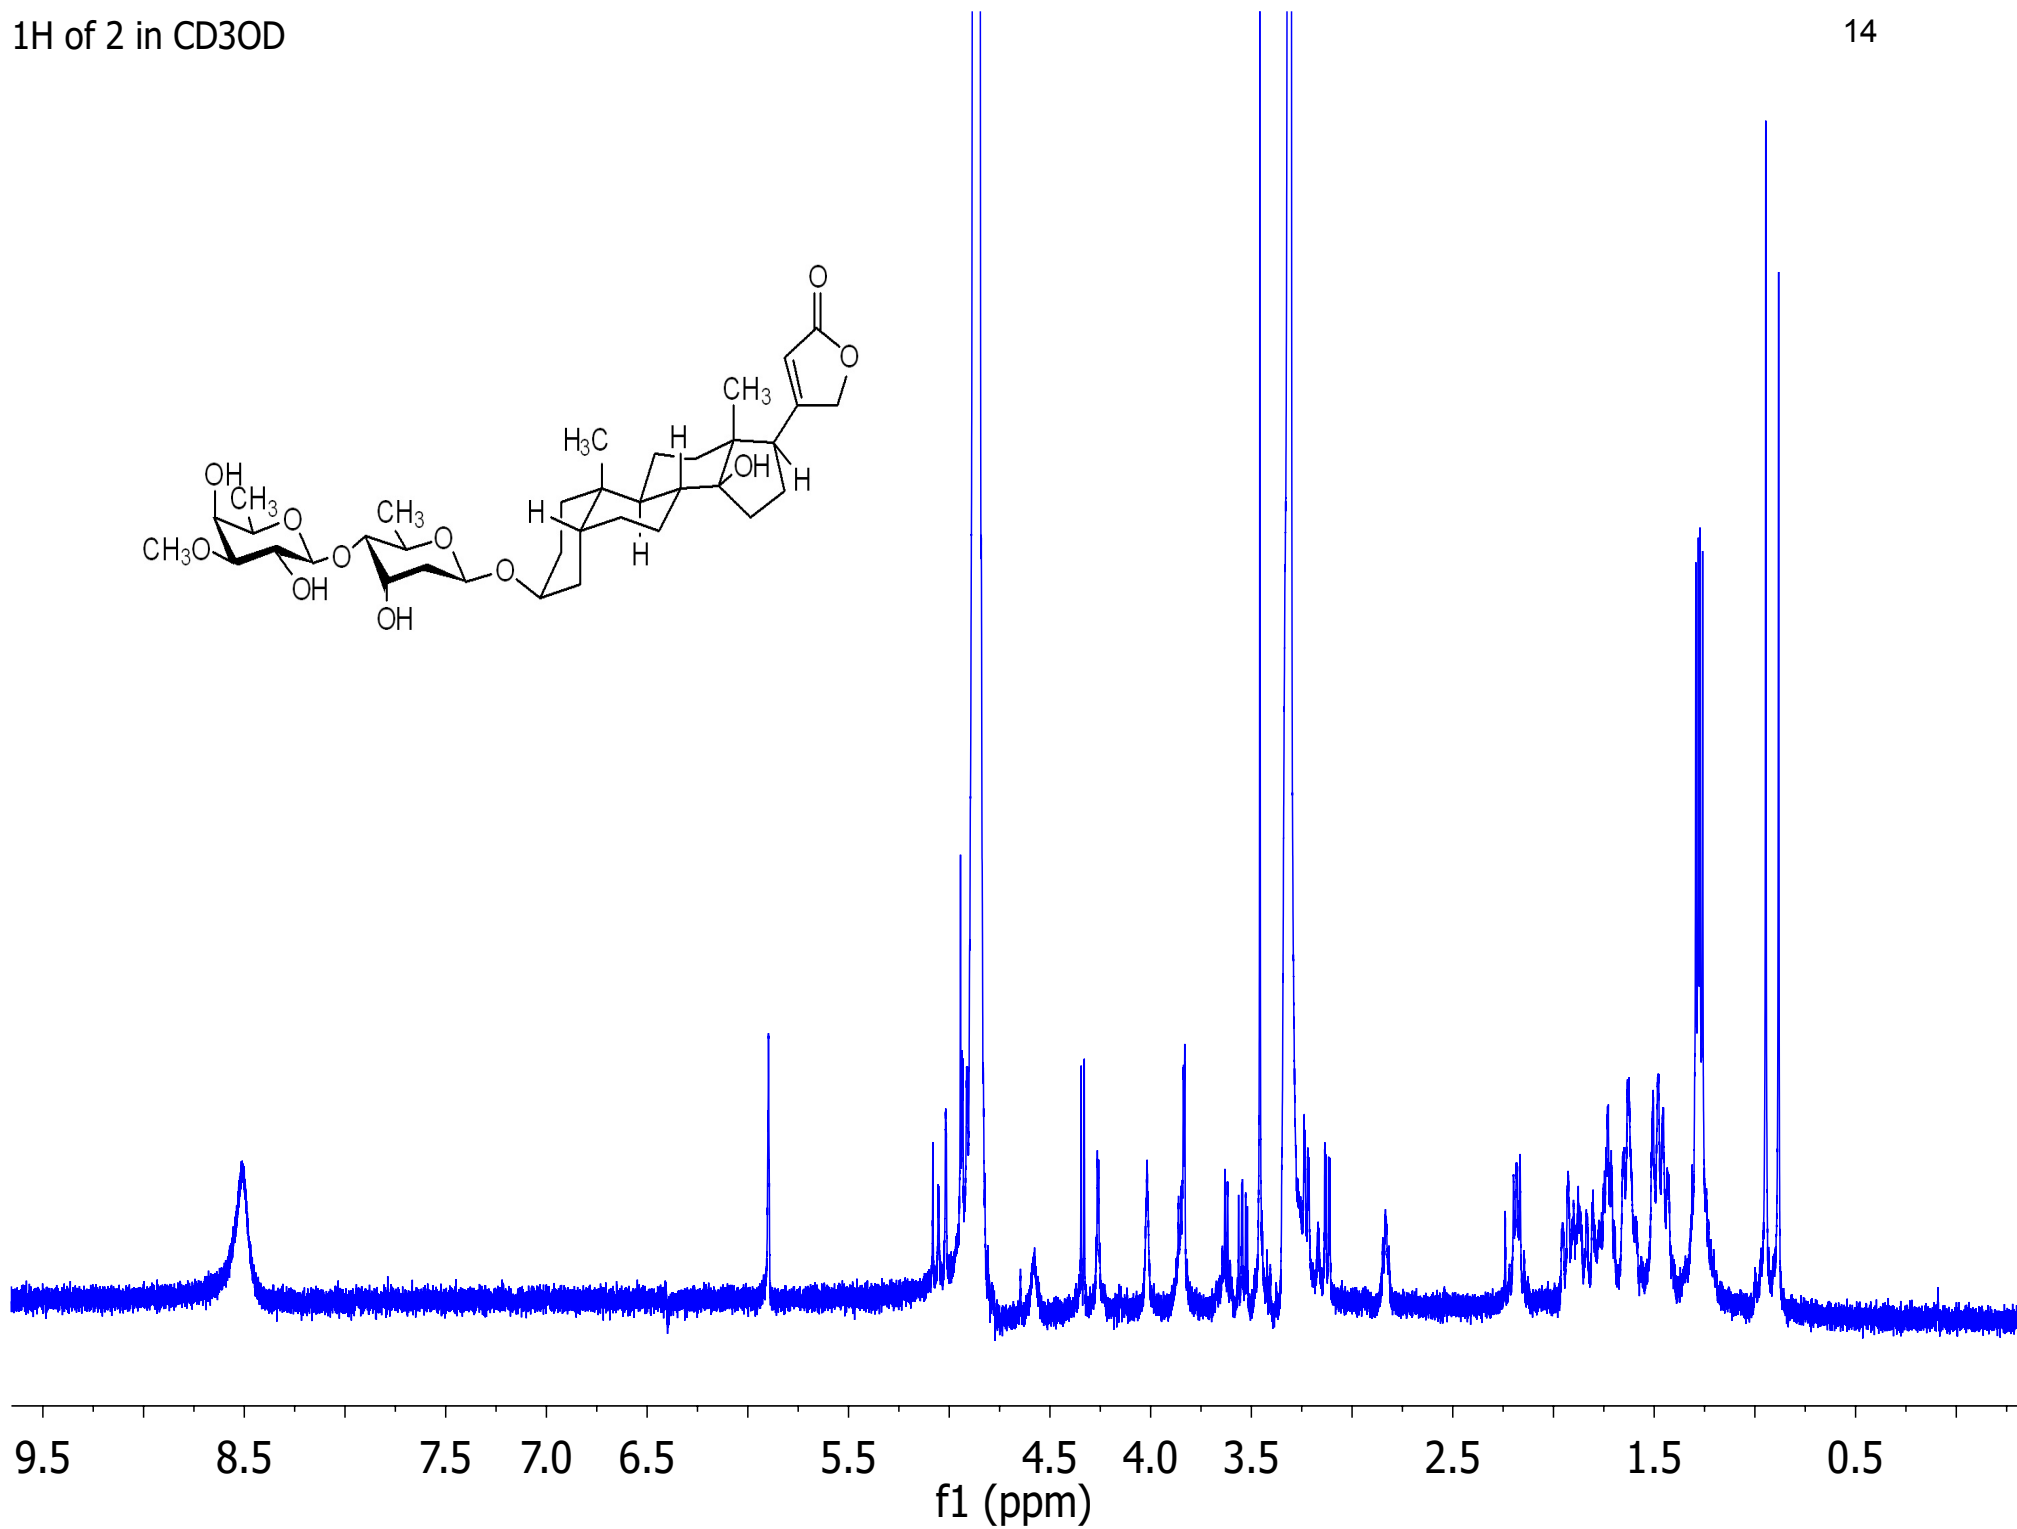

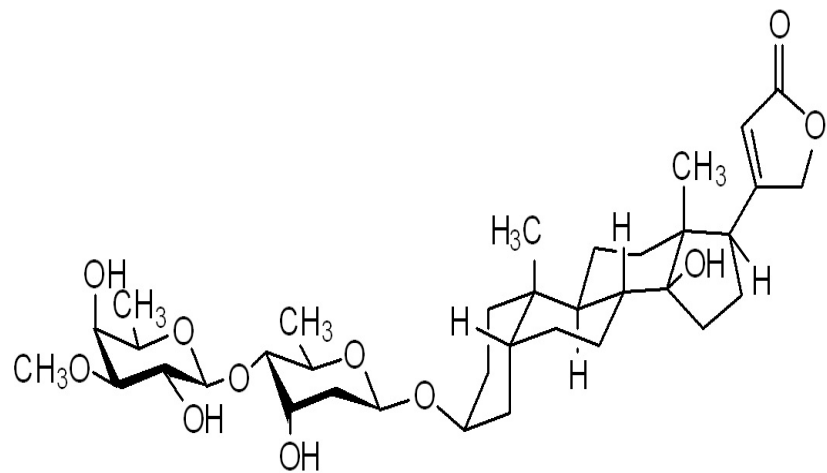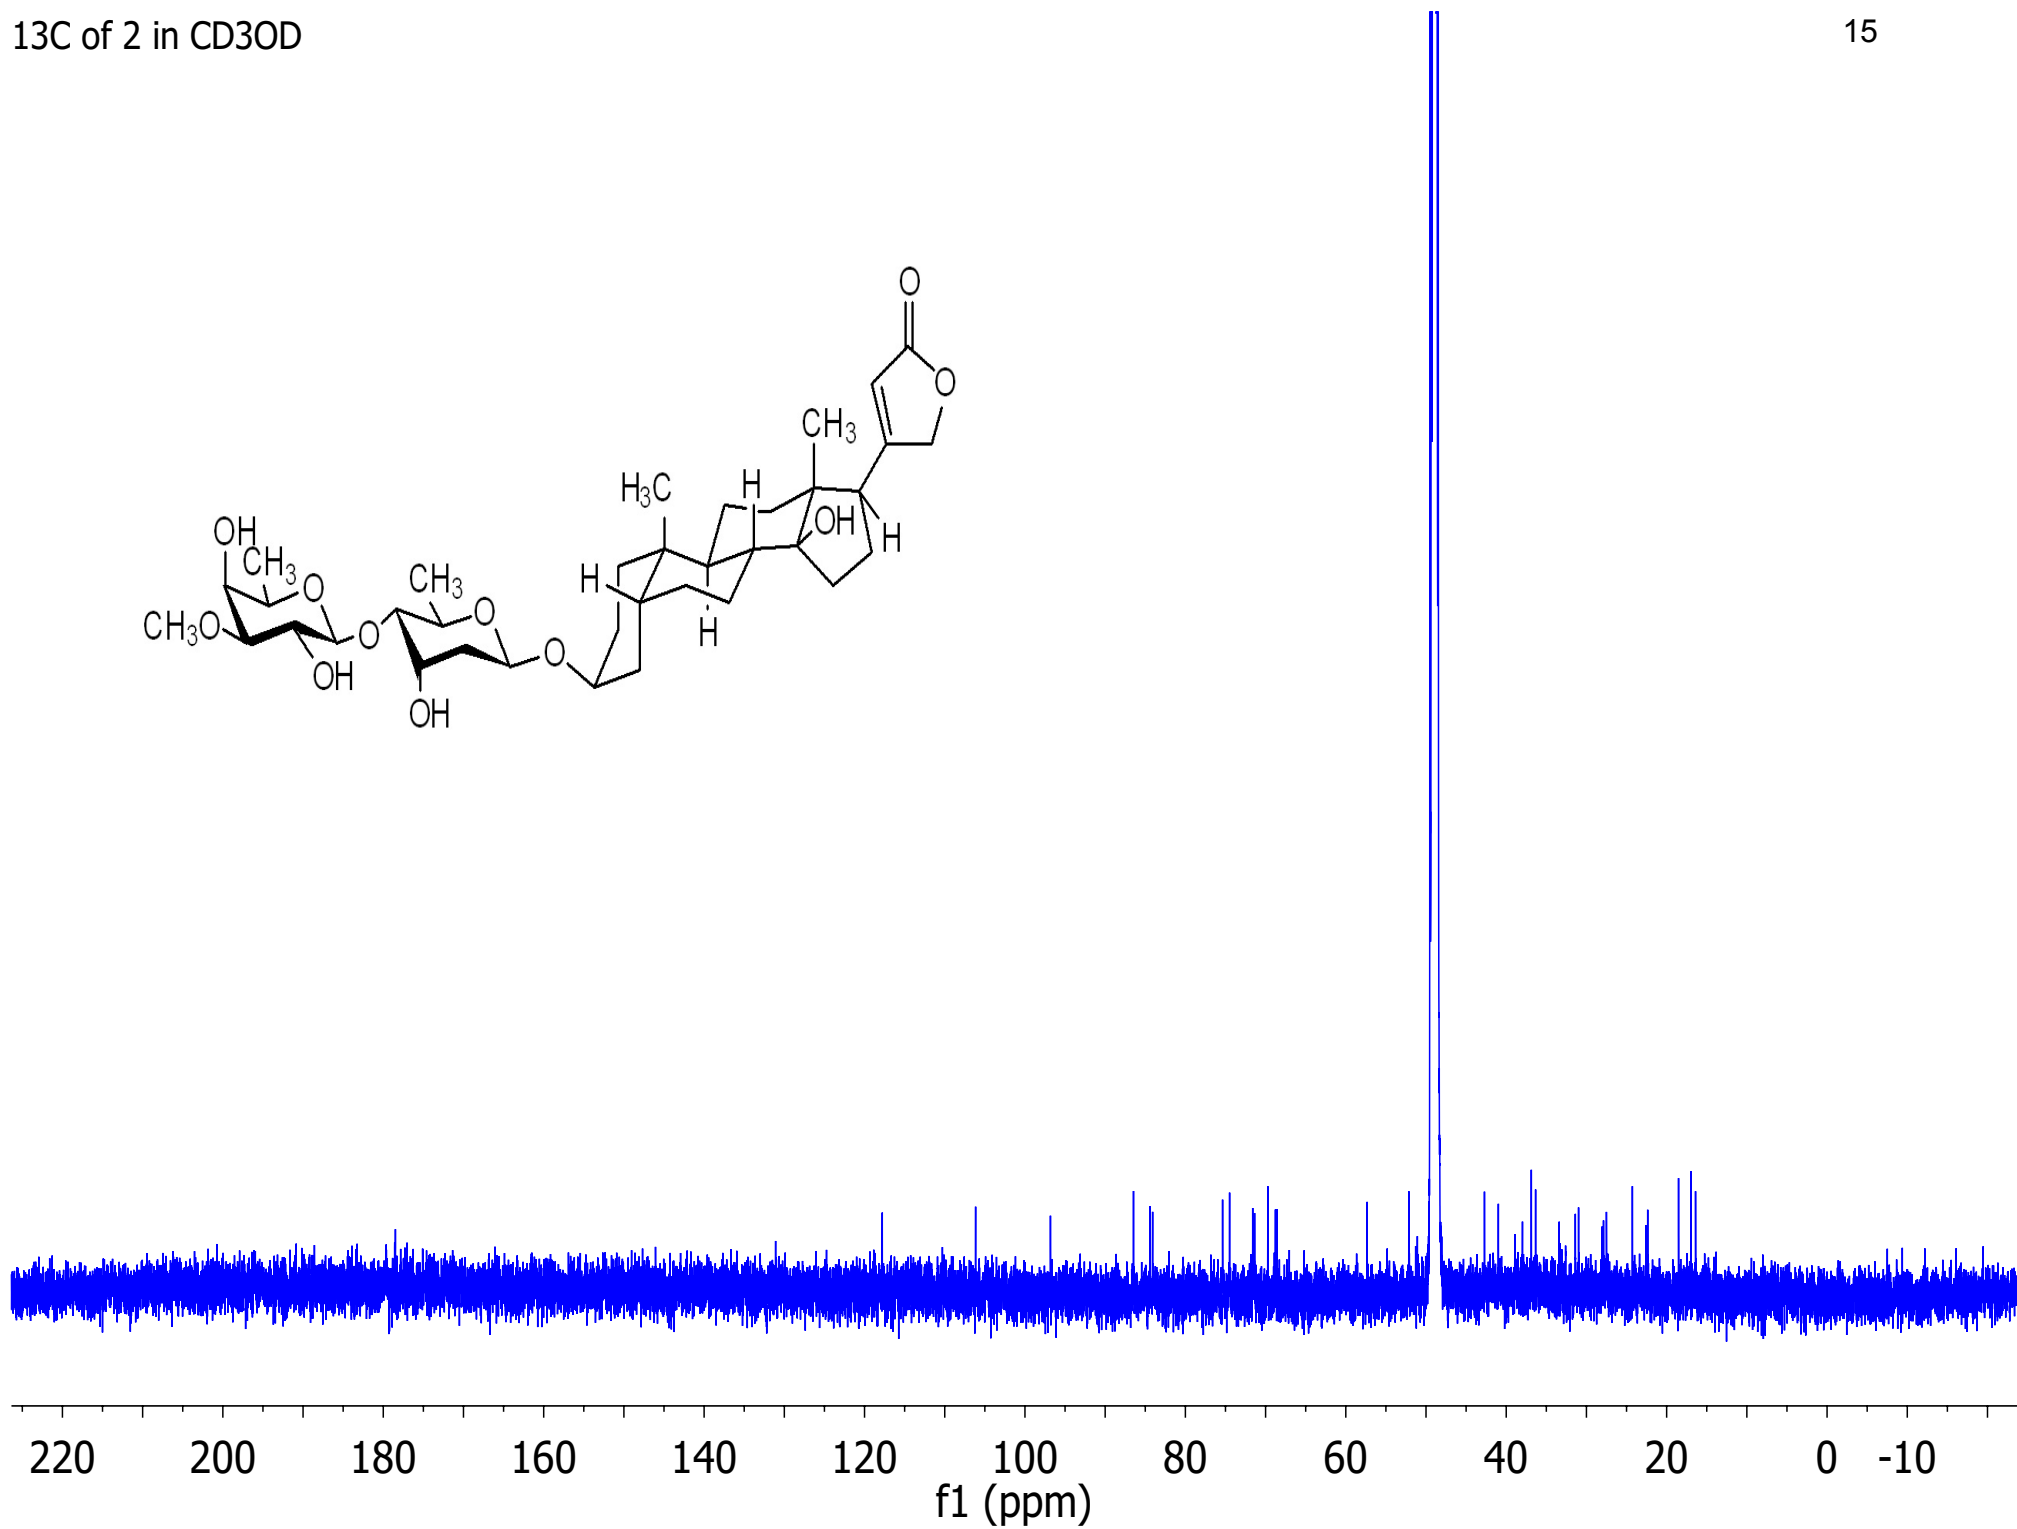



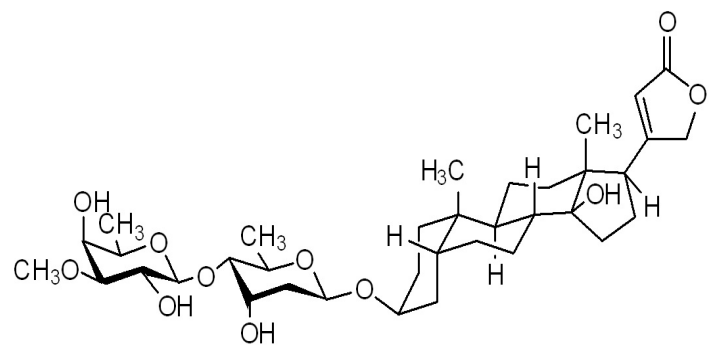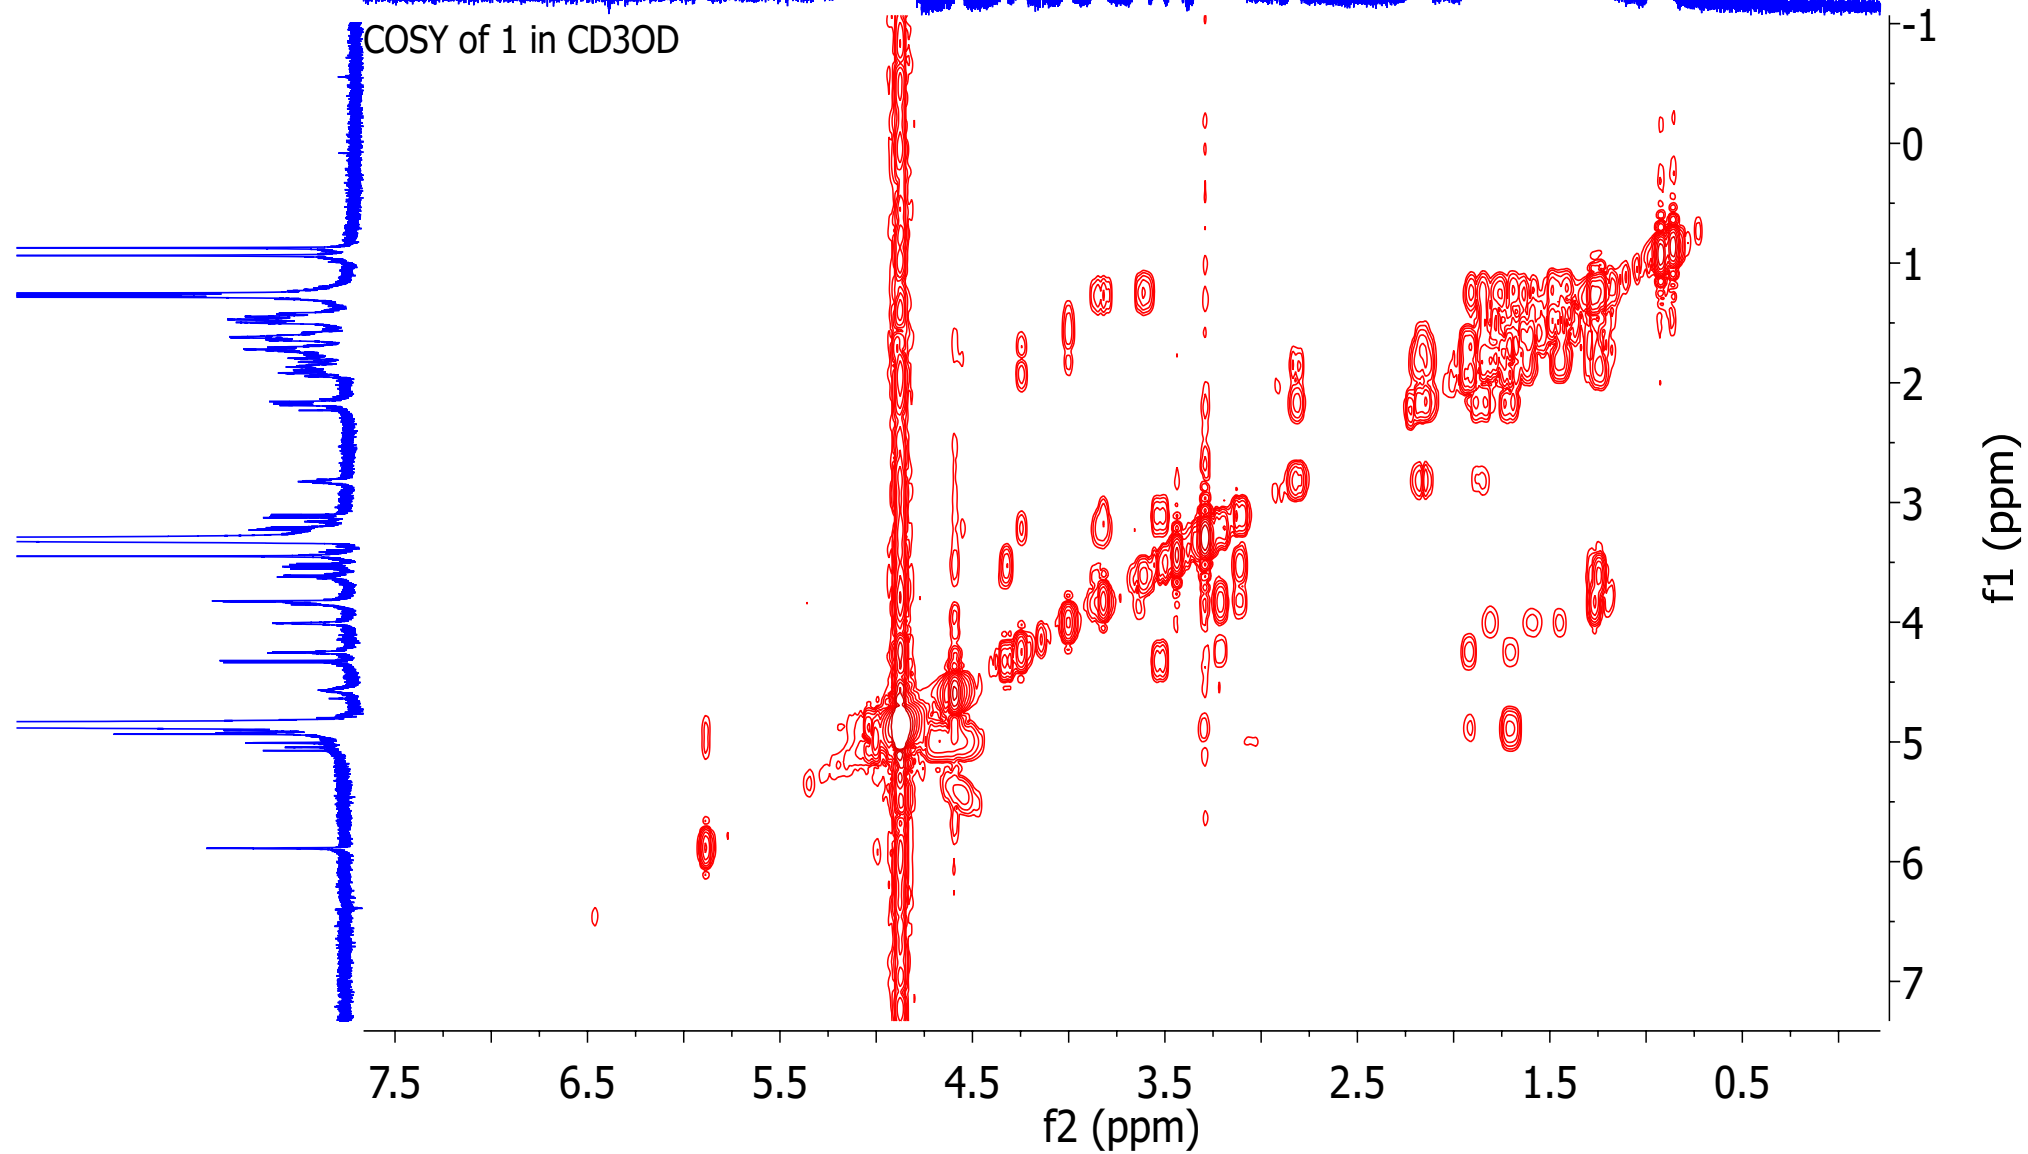

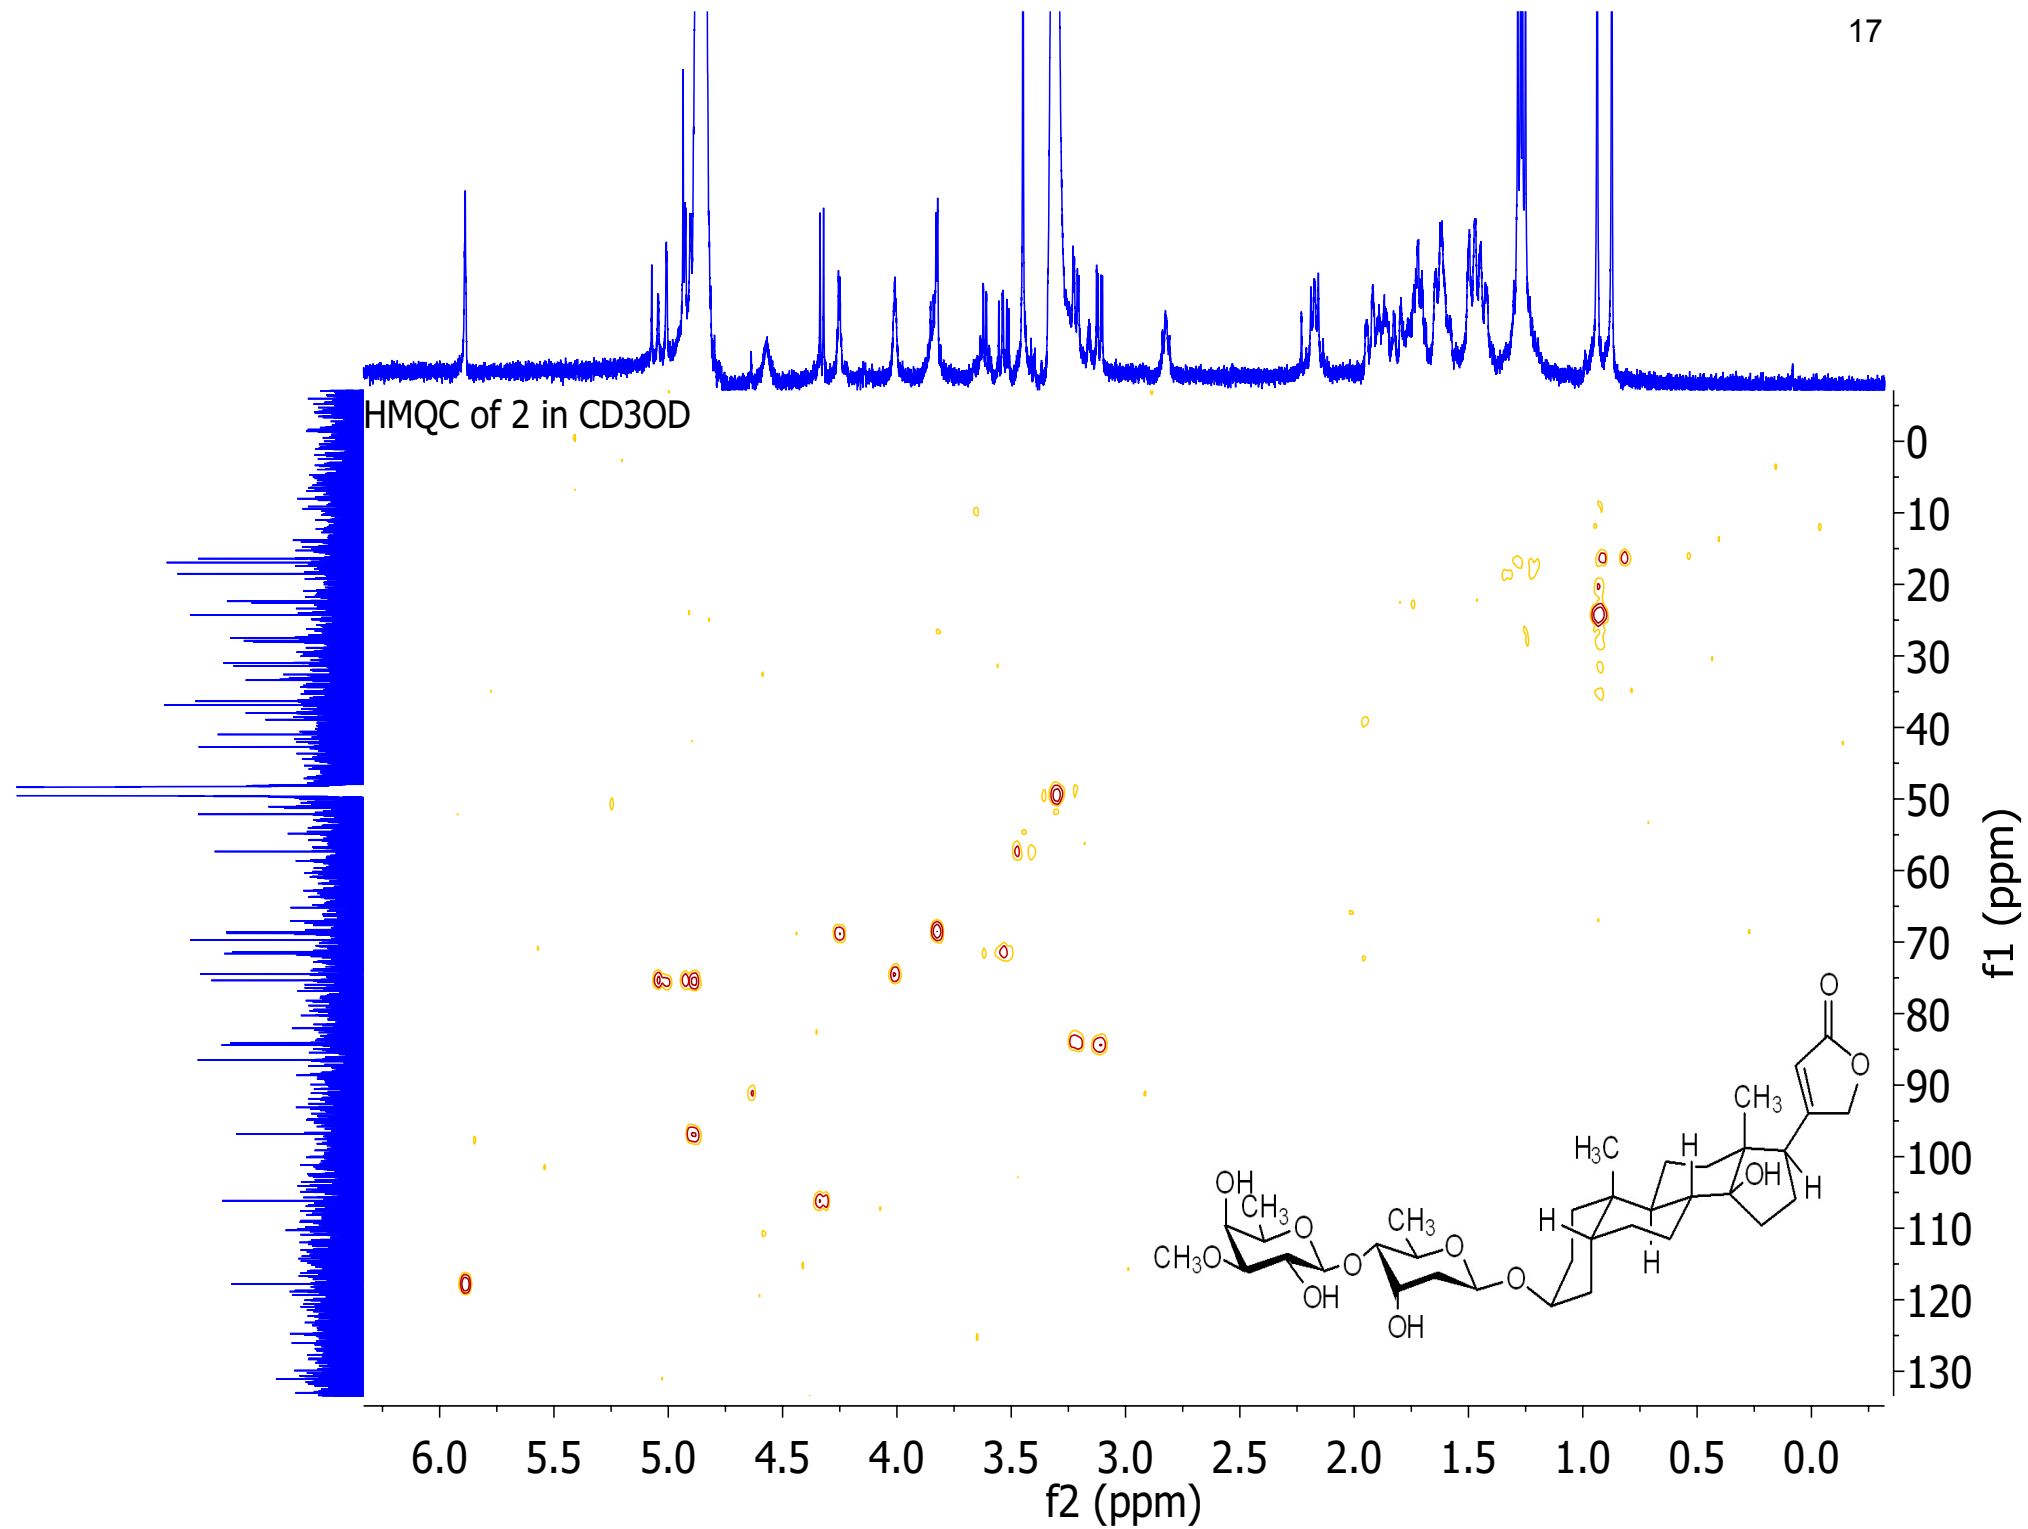

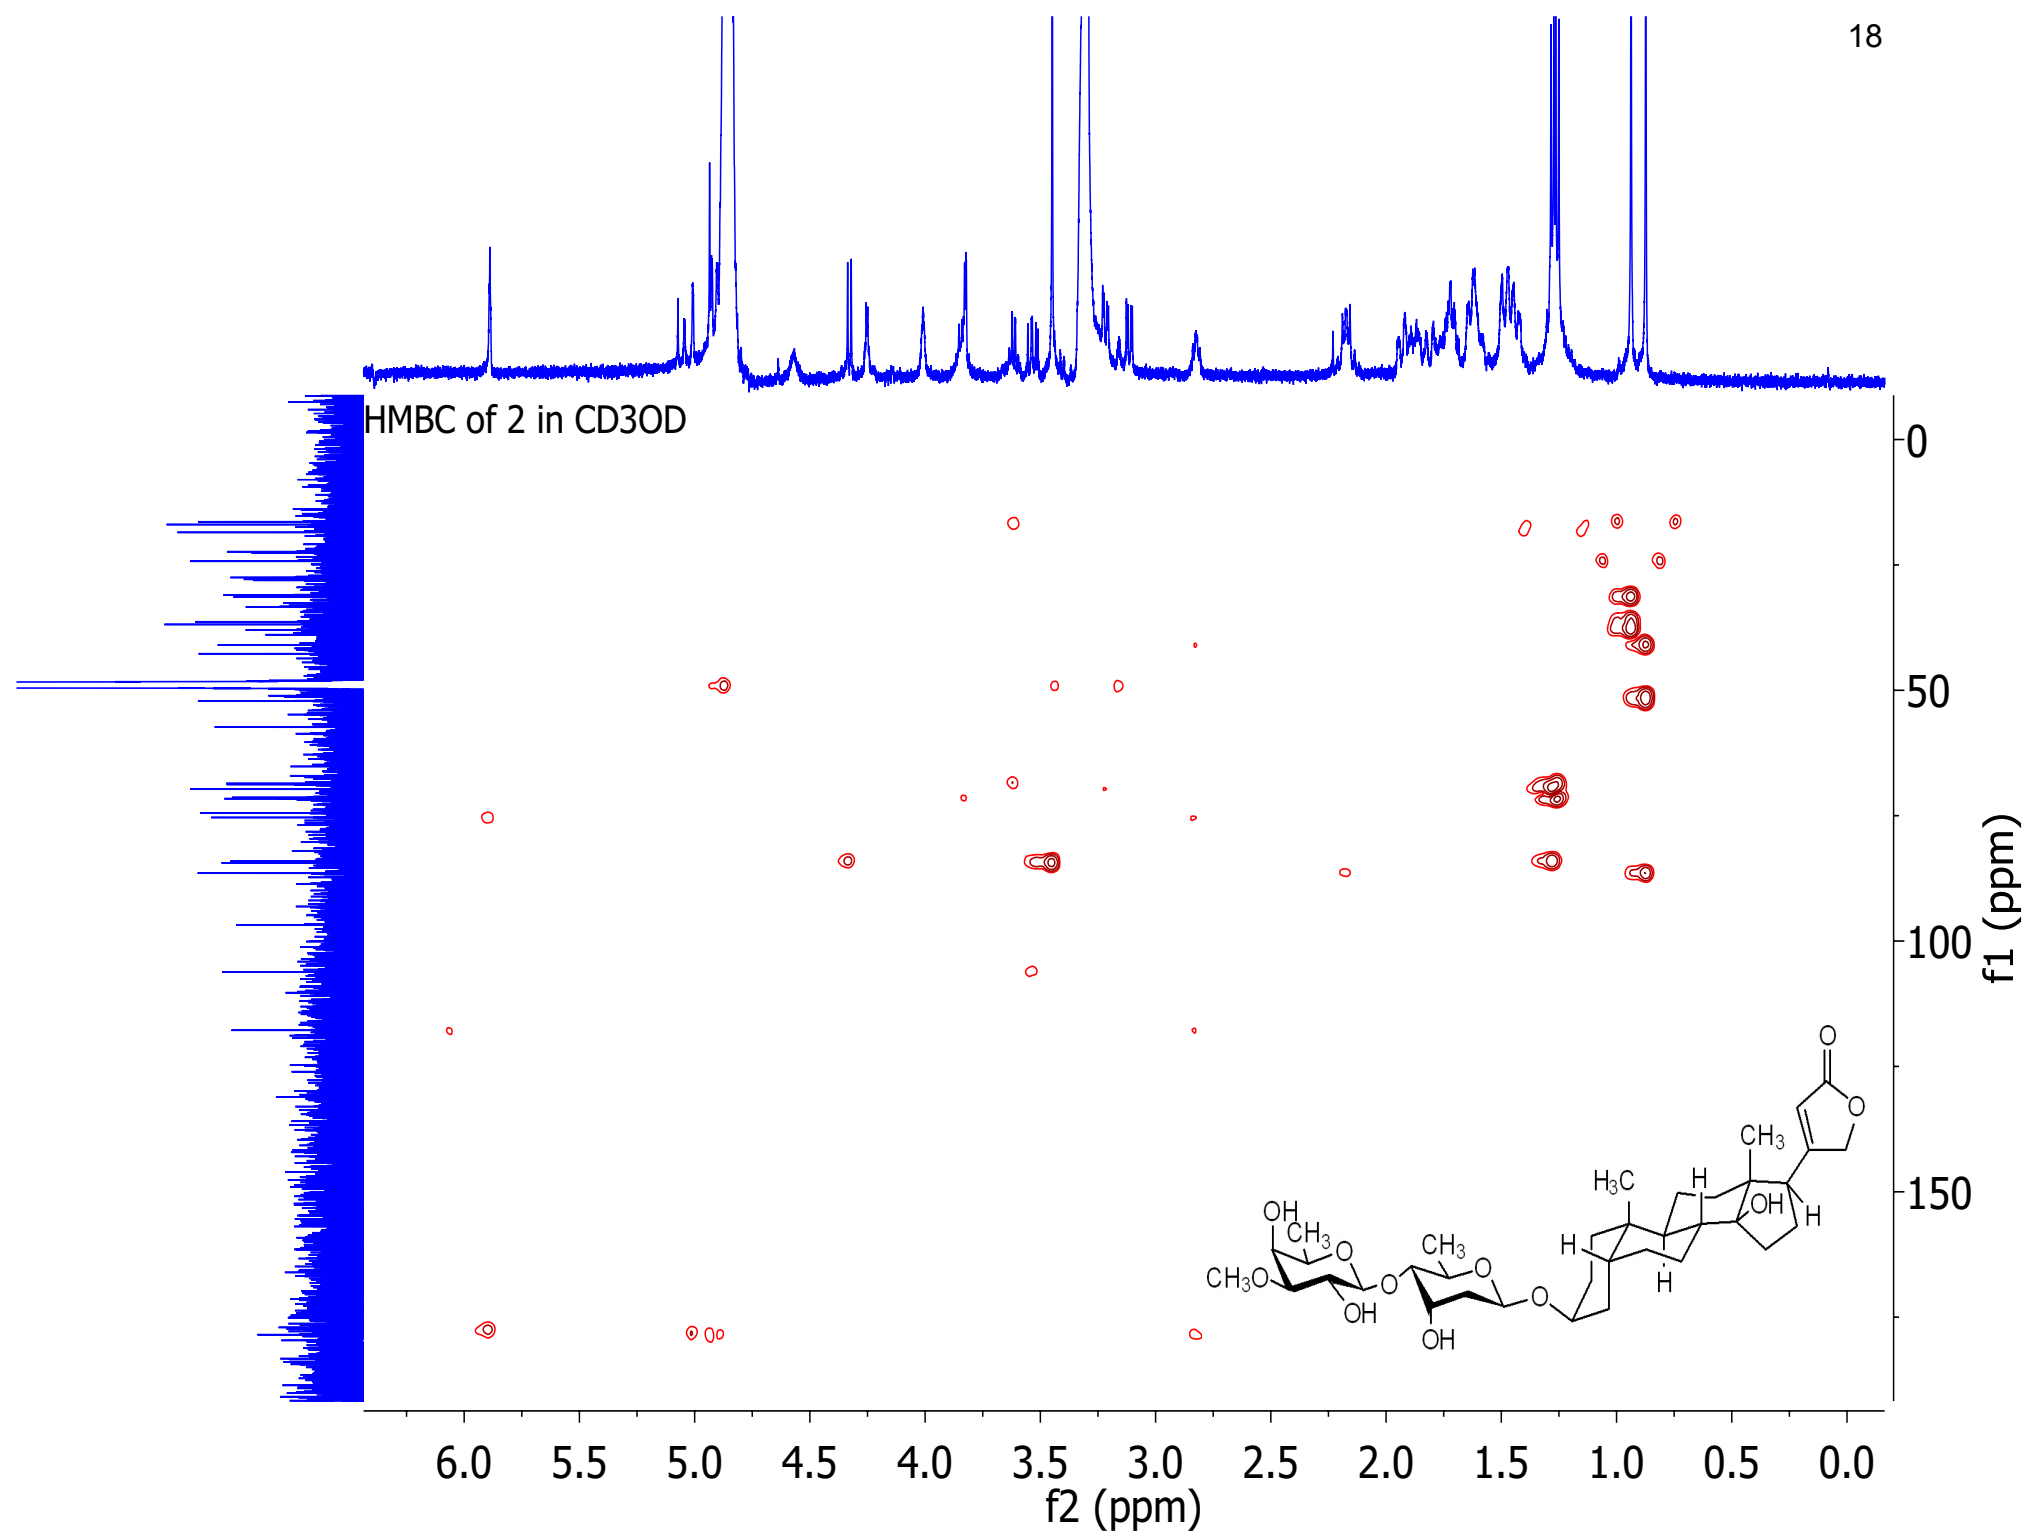

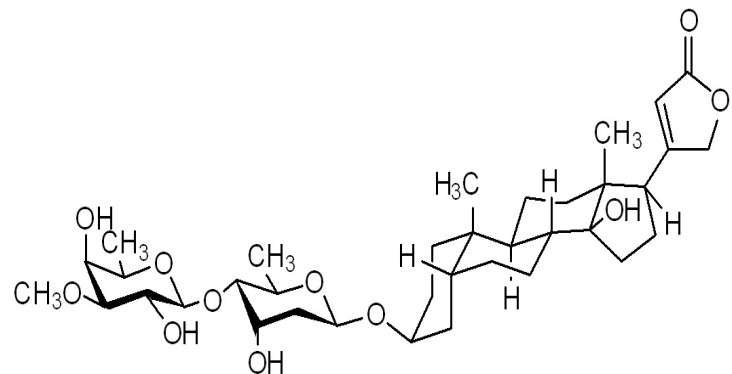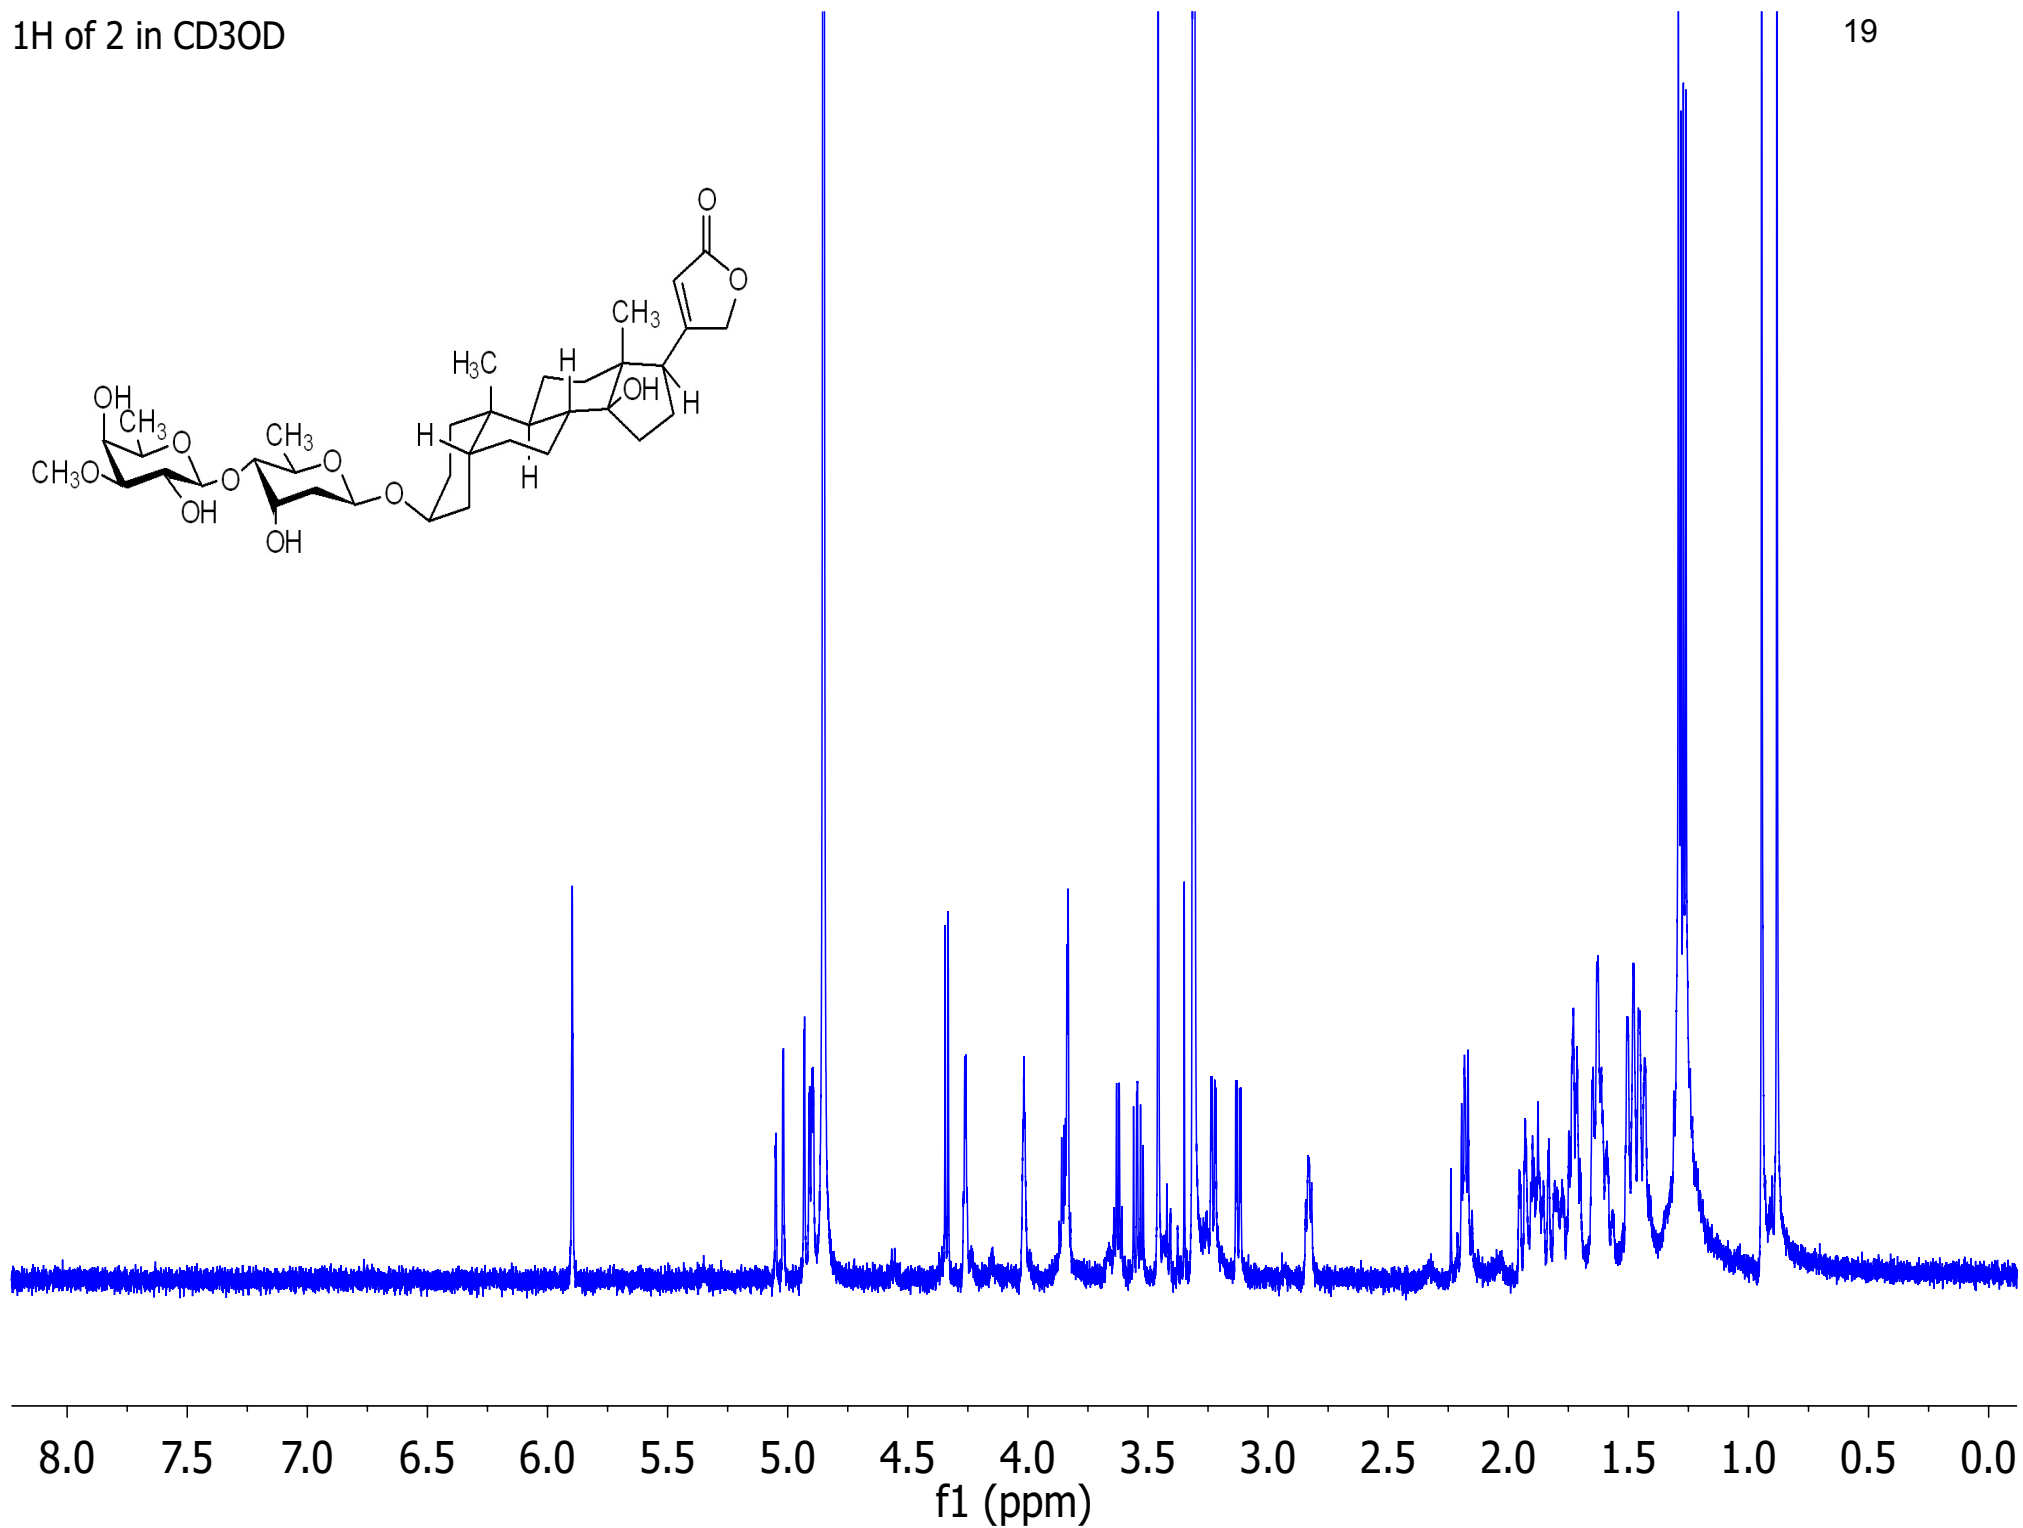

1H of 3 in CD3OD

20

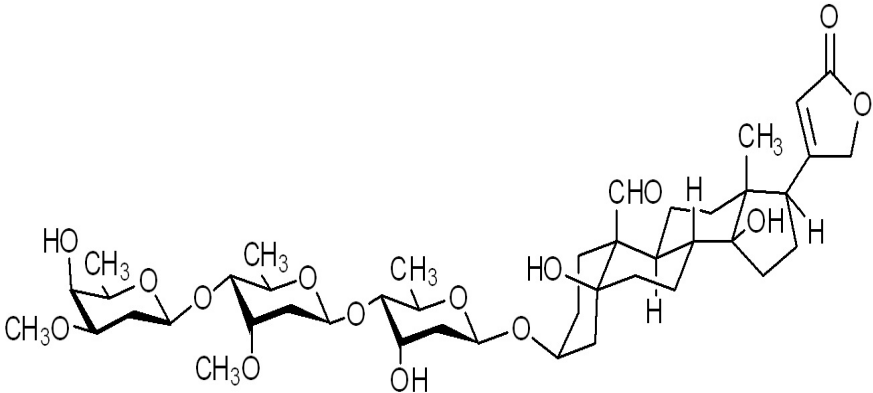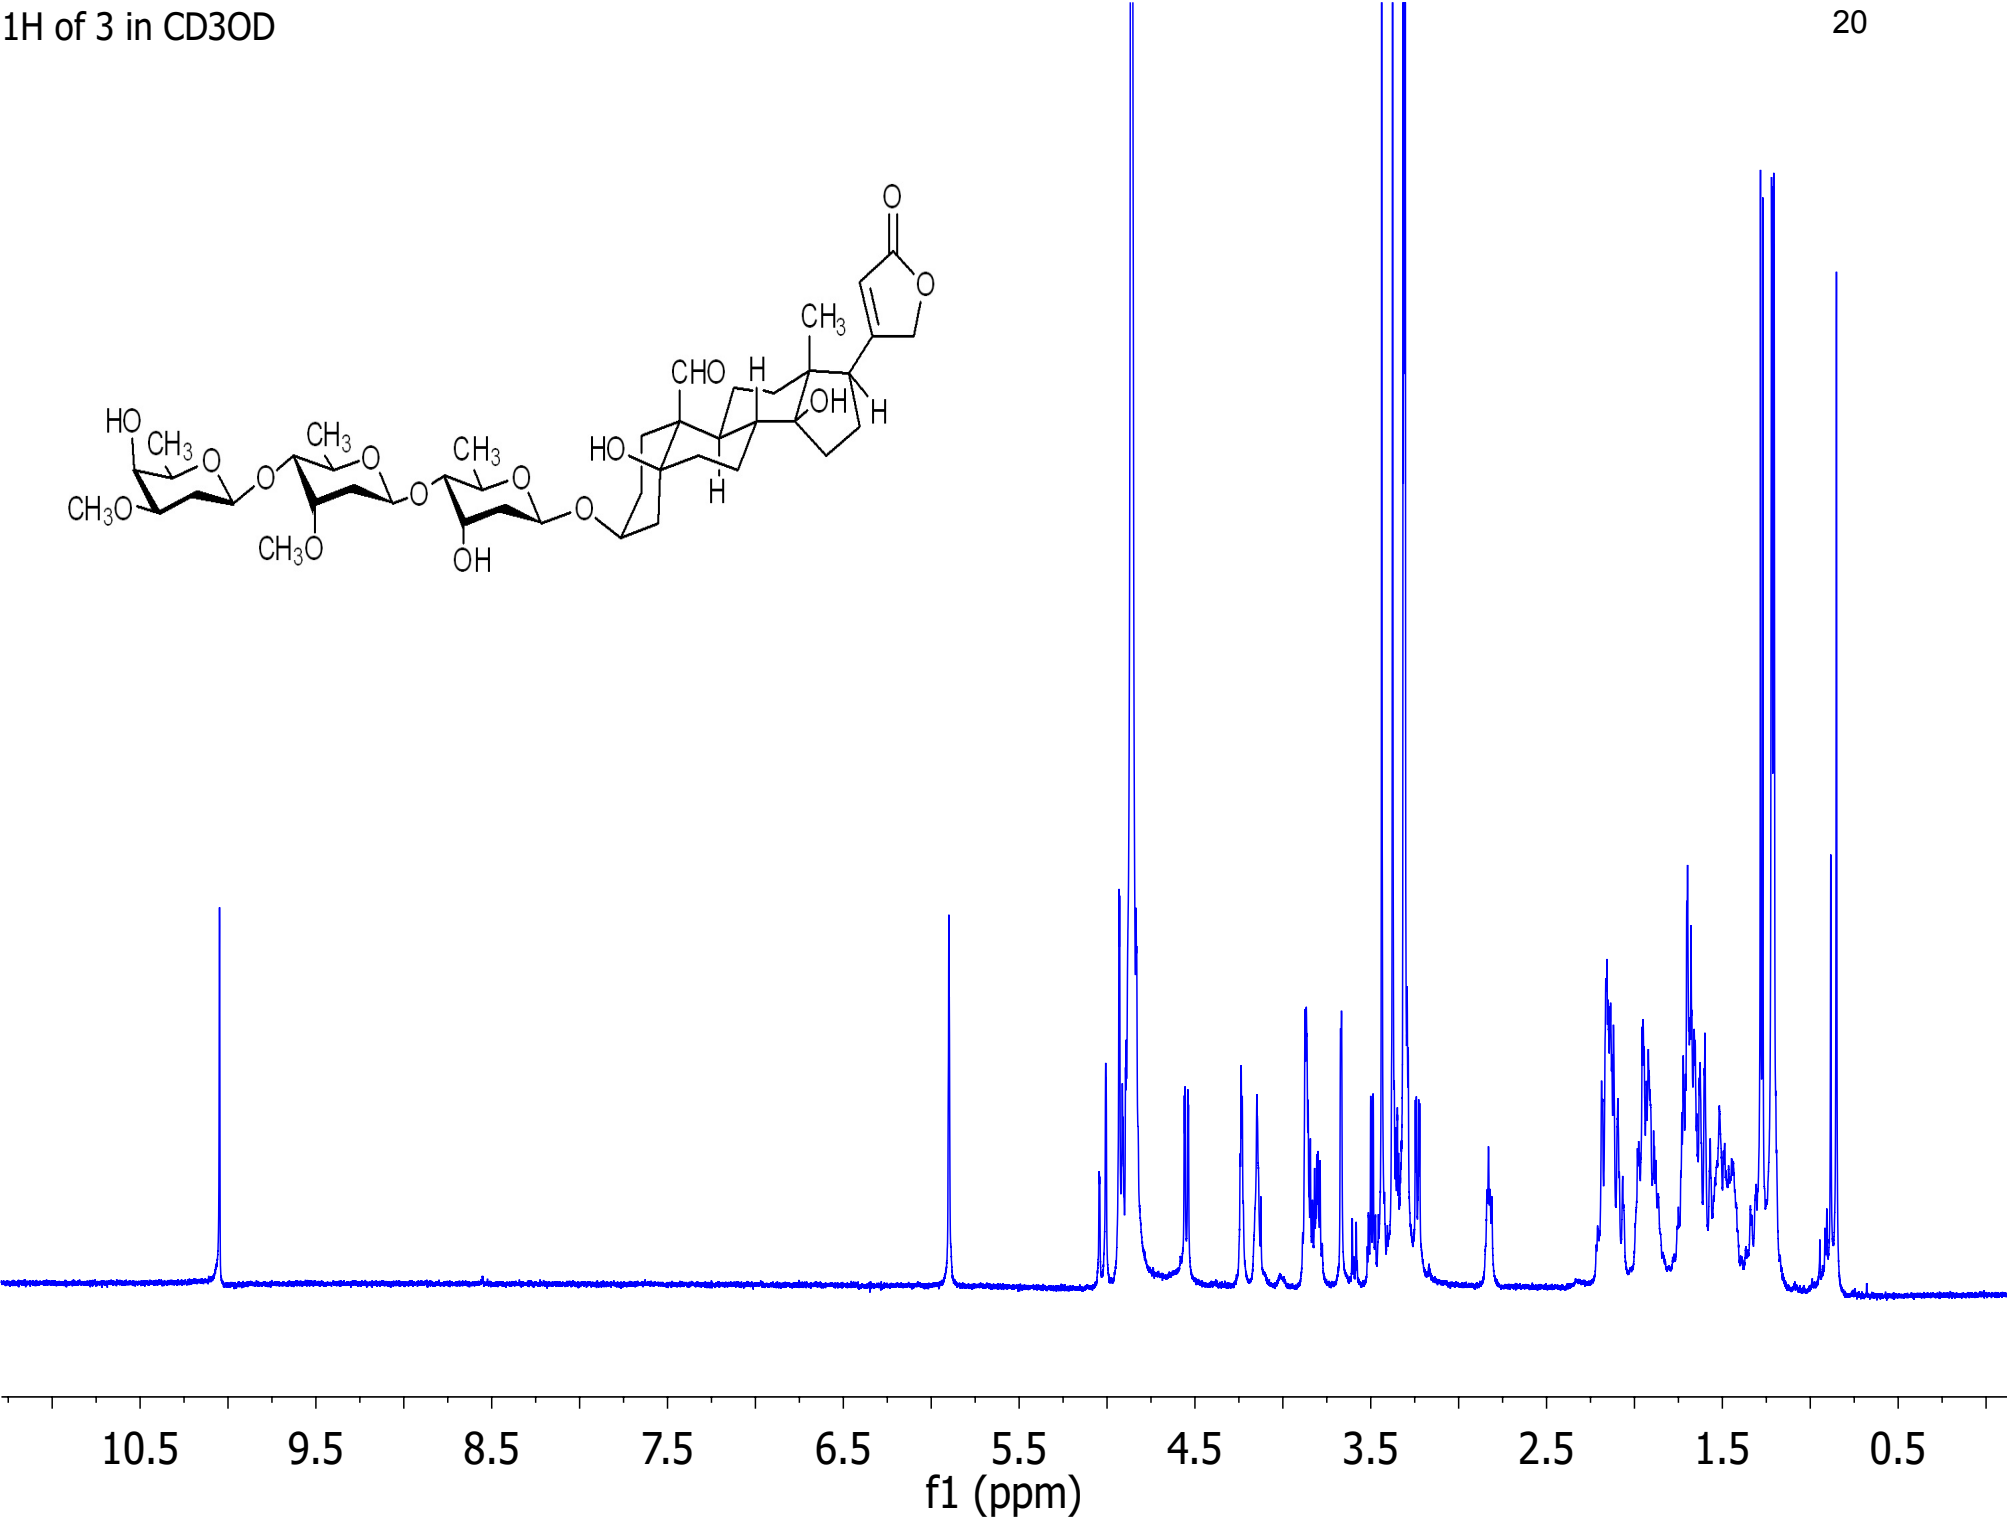

10.5 9.5 8.5 7.5 6.5 5.5 4.5 3.5 2.5 1.5 0.5  
f1 (ppm)

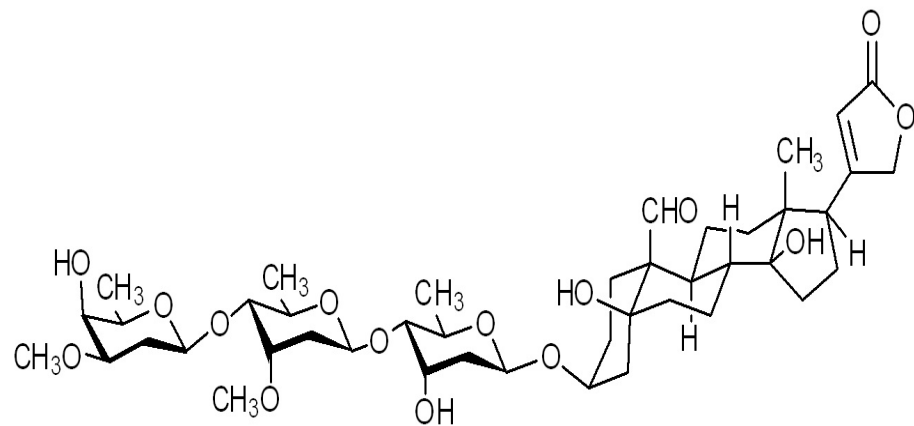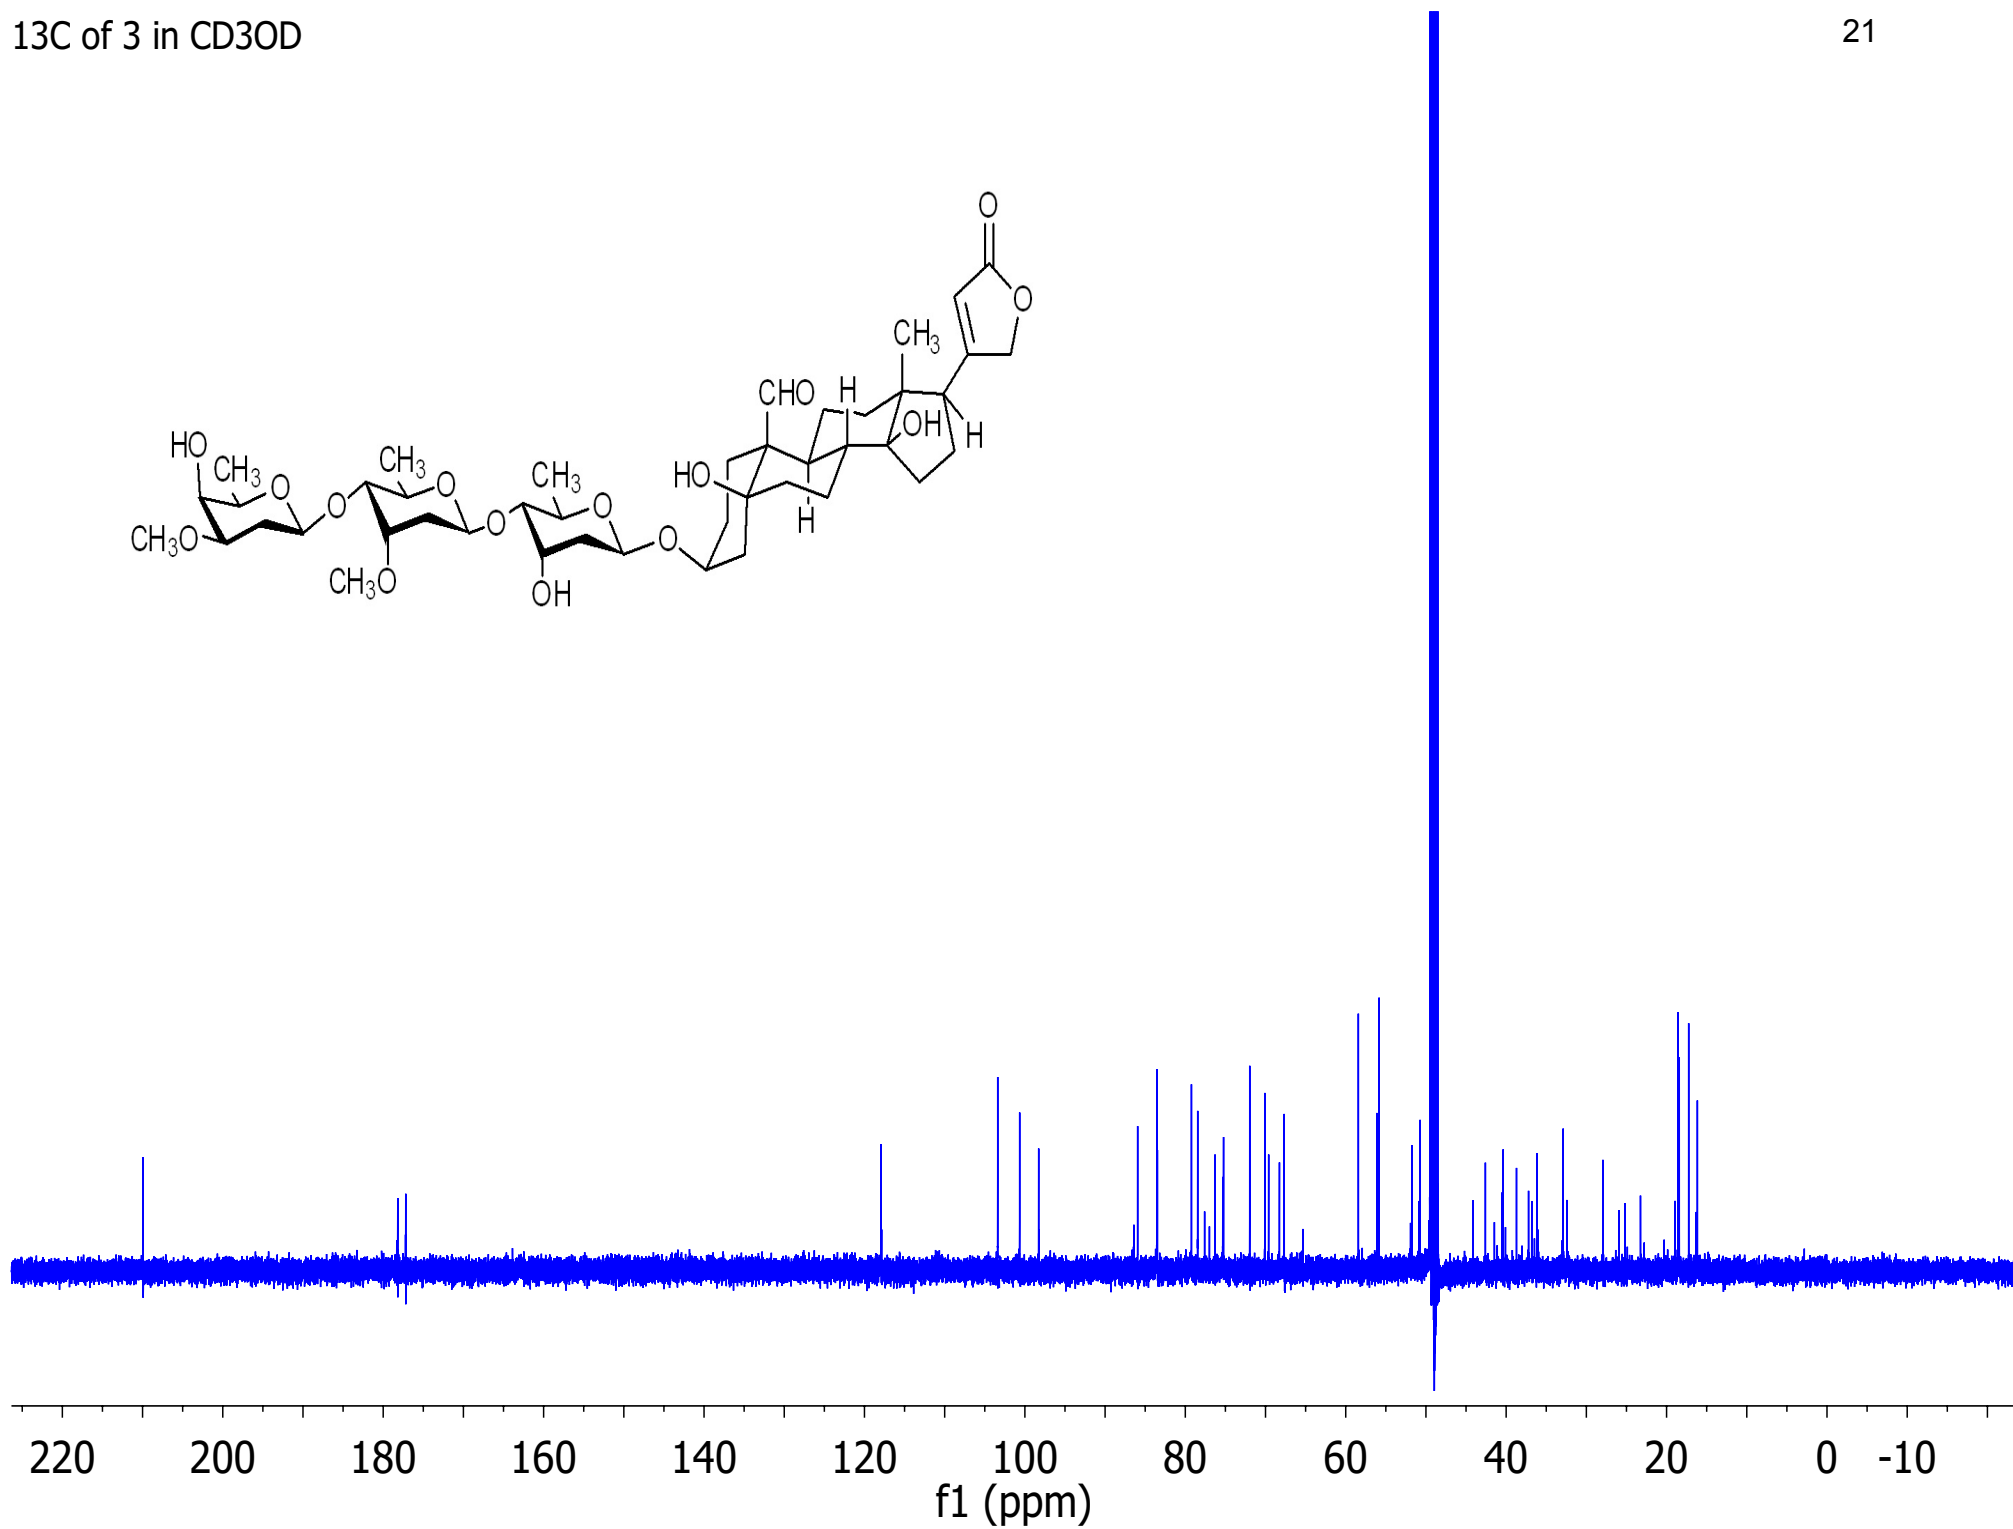

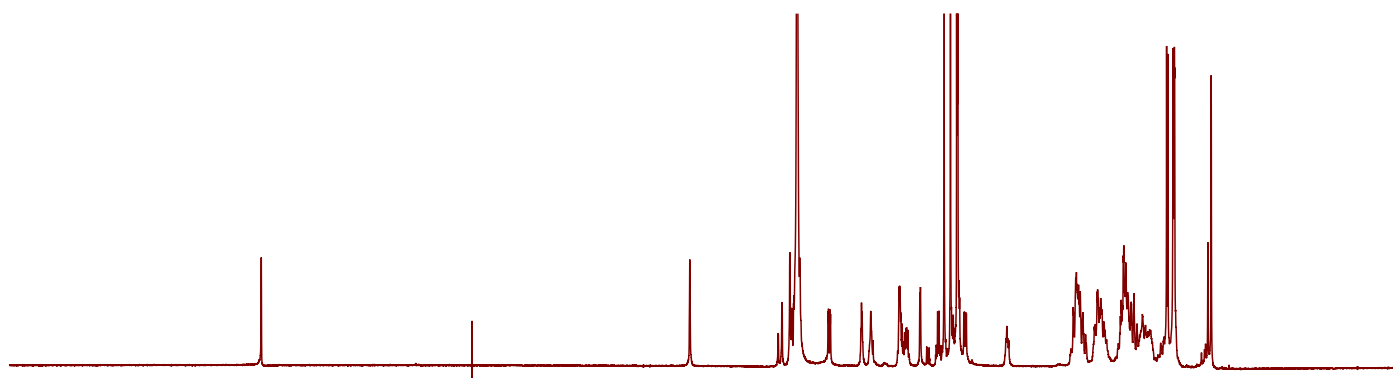

COSY of 3 in CD3OD

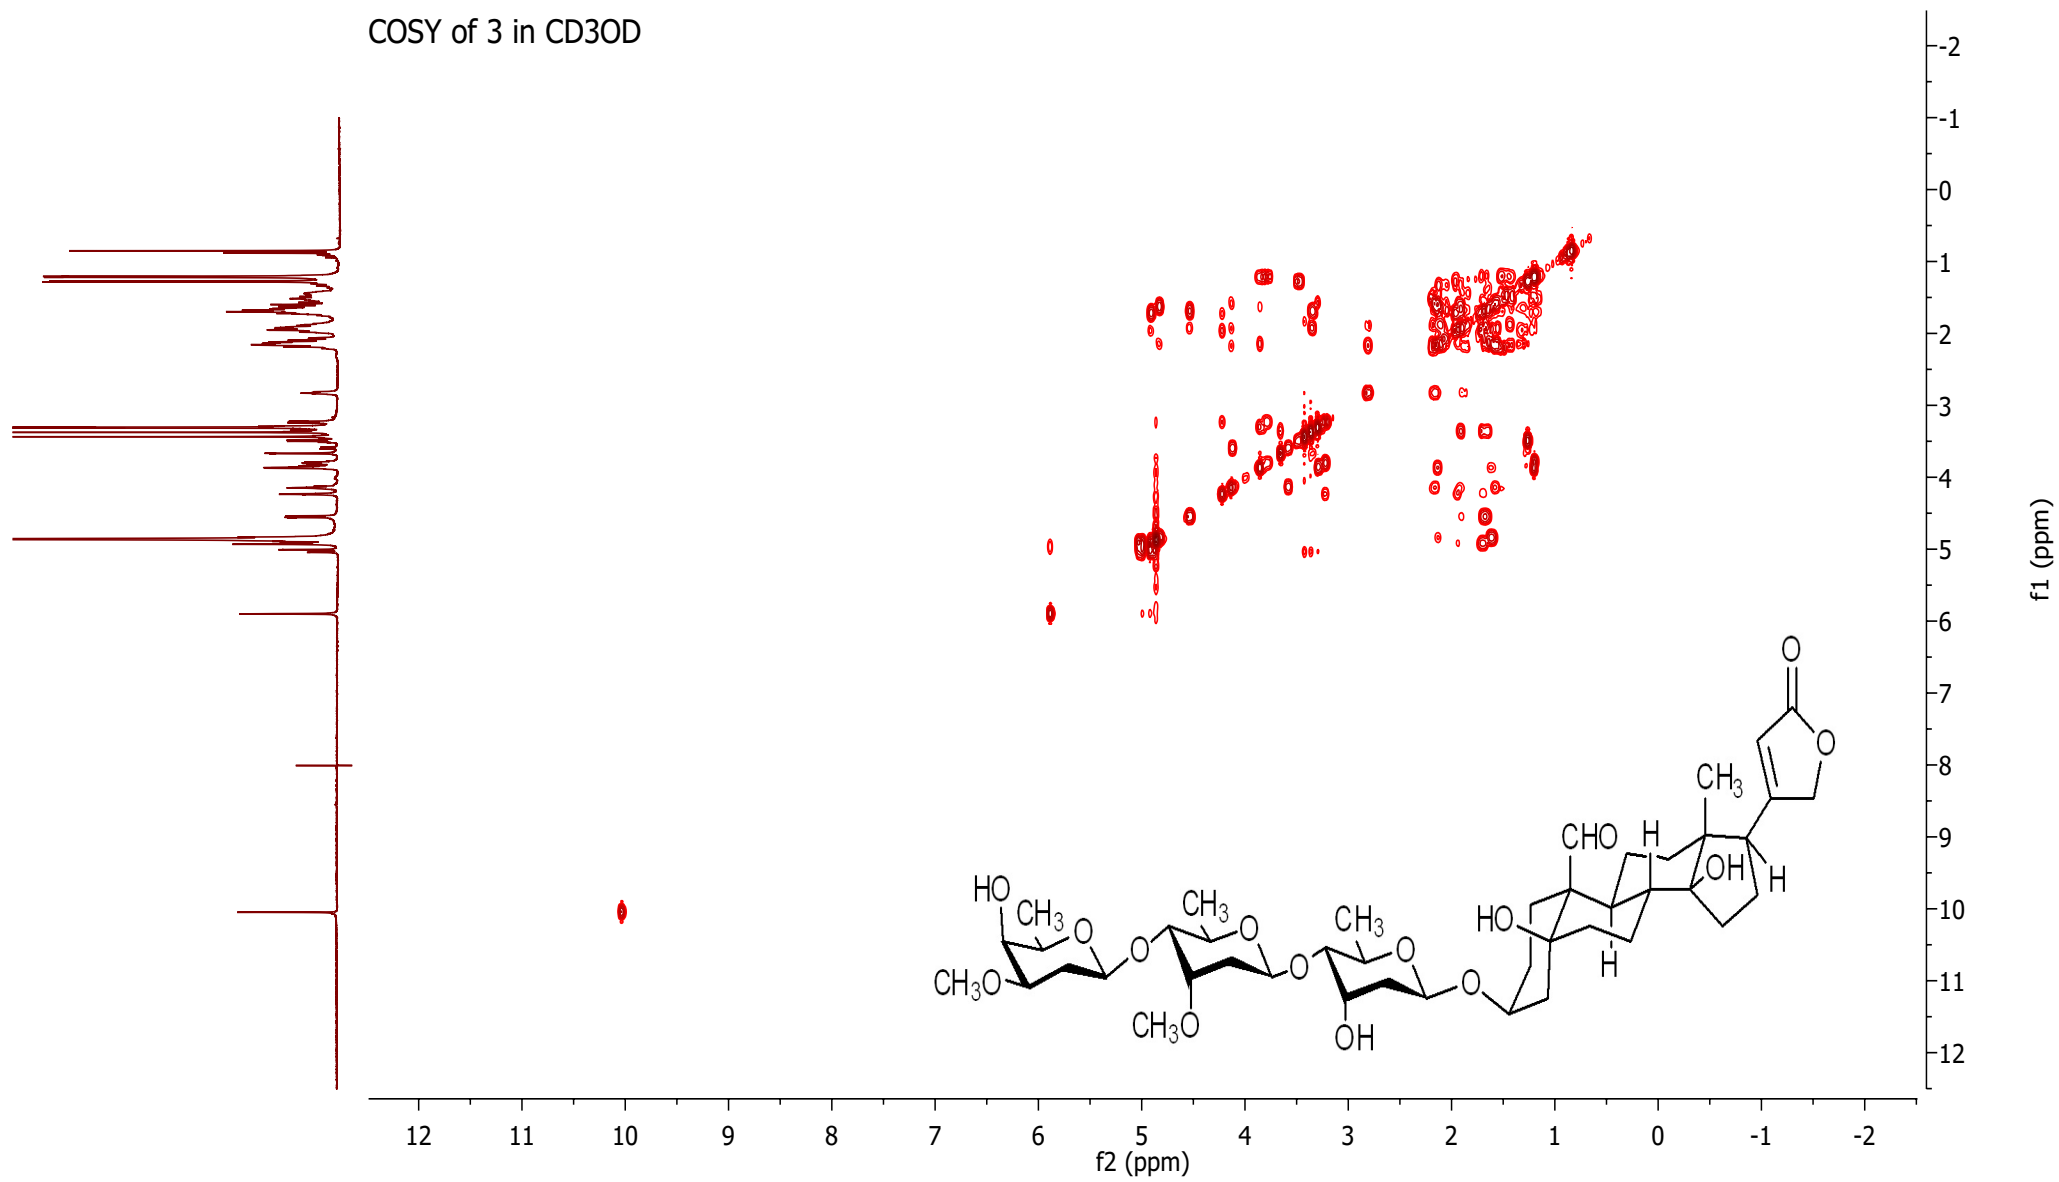

ep213-274-65-14-HMQCinMeOH-081509  
 gradient enhanced HMQC with X-decoupling

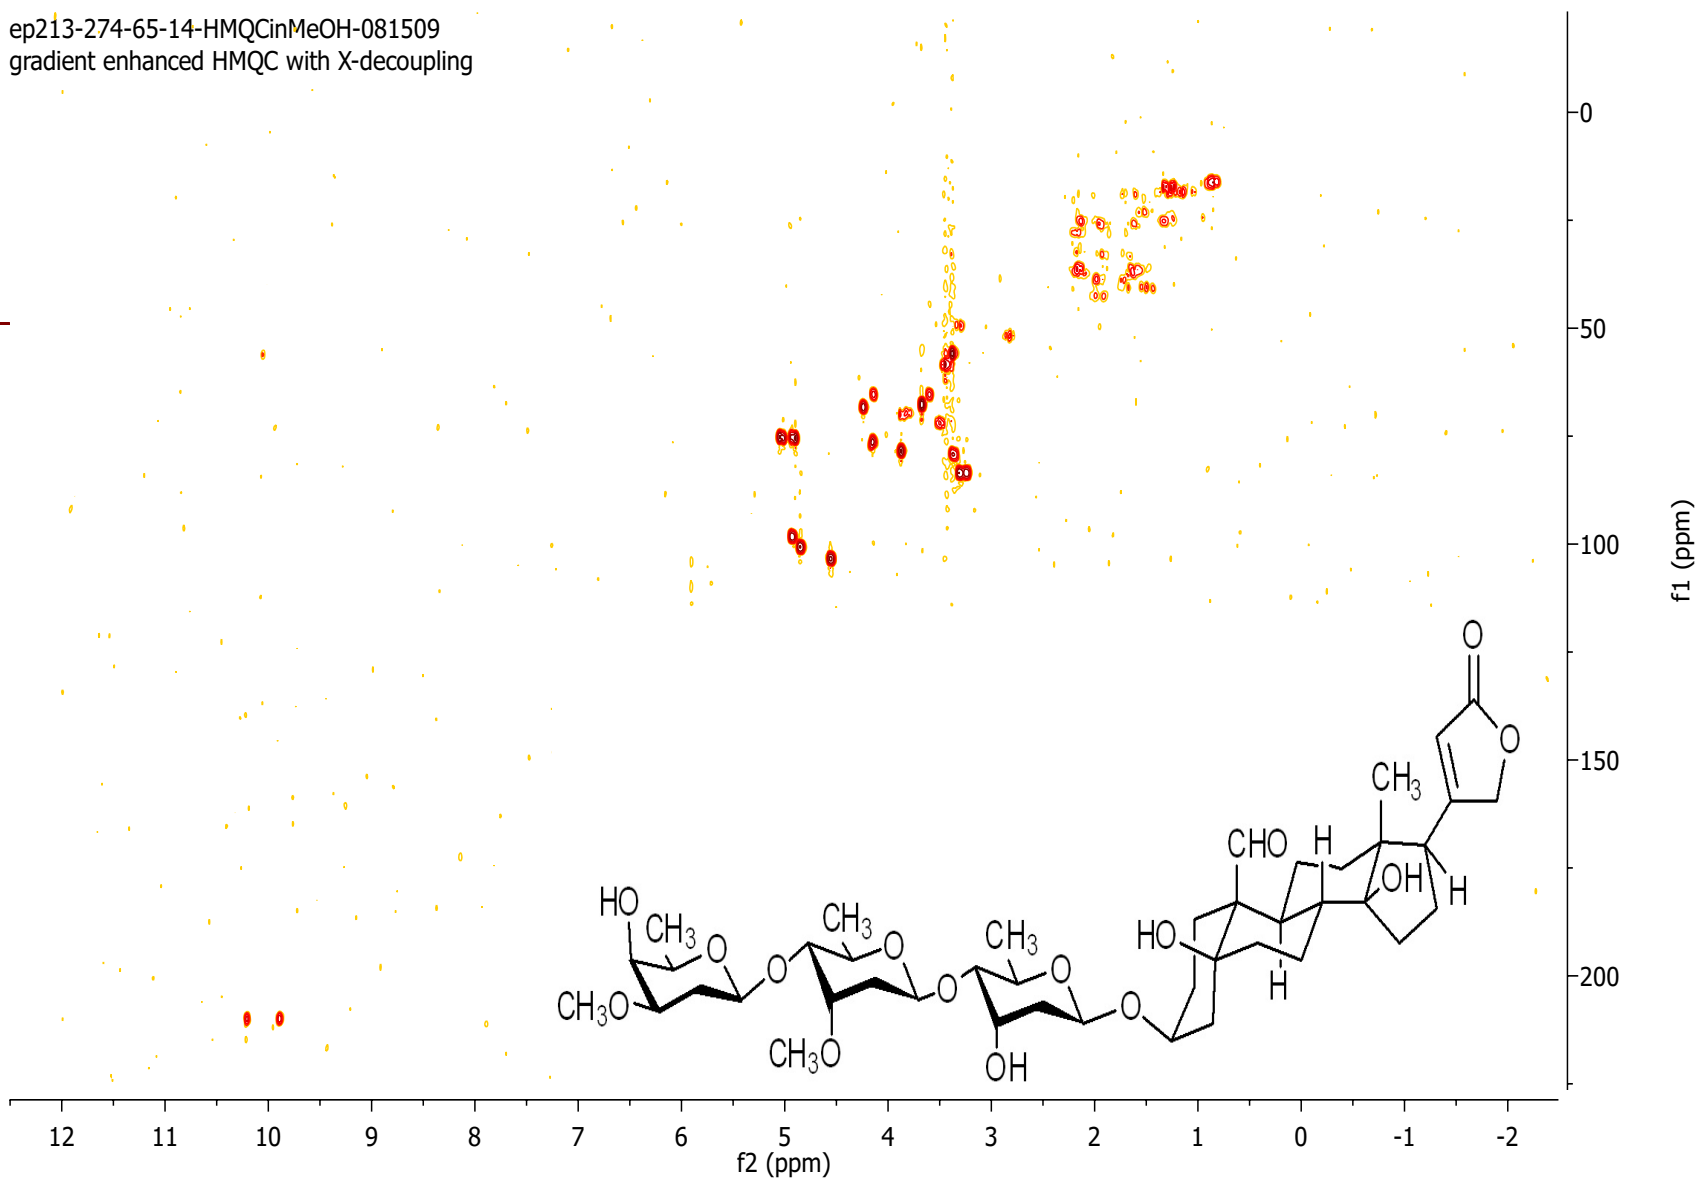



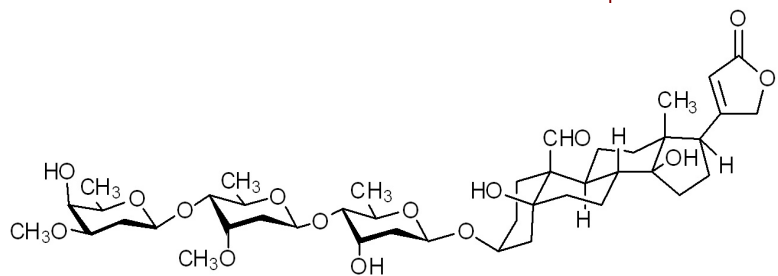

ep213-274-65-14-HMBCinMeOH-081509  
gradient enhanced HMBC

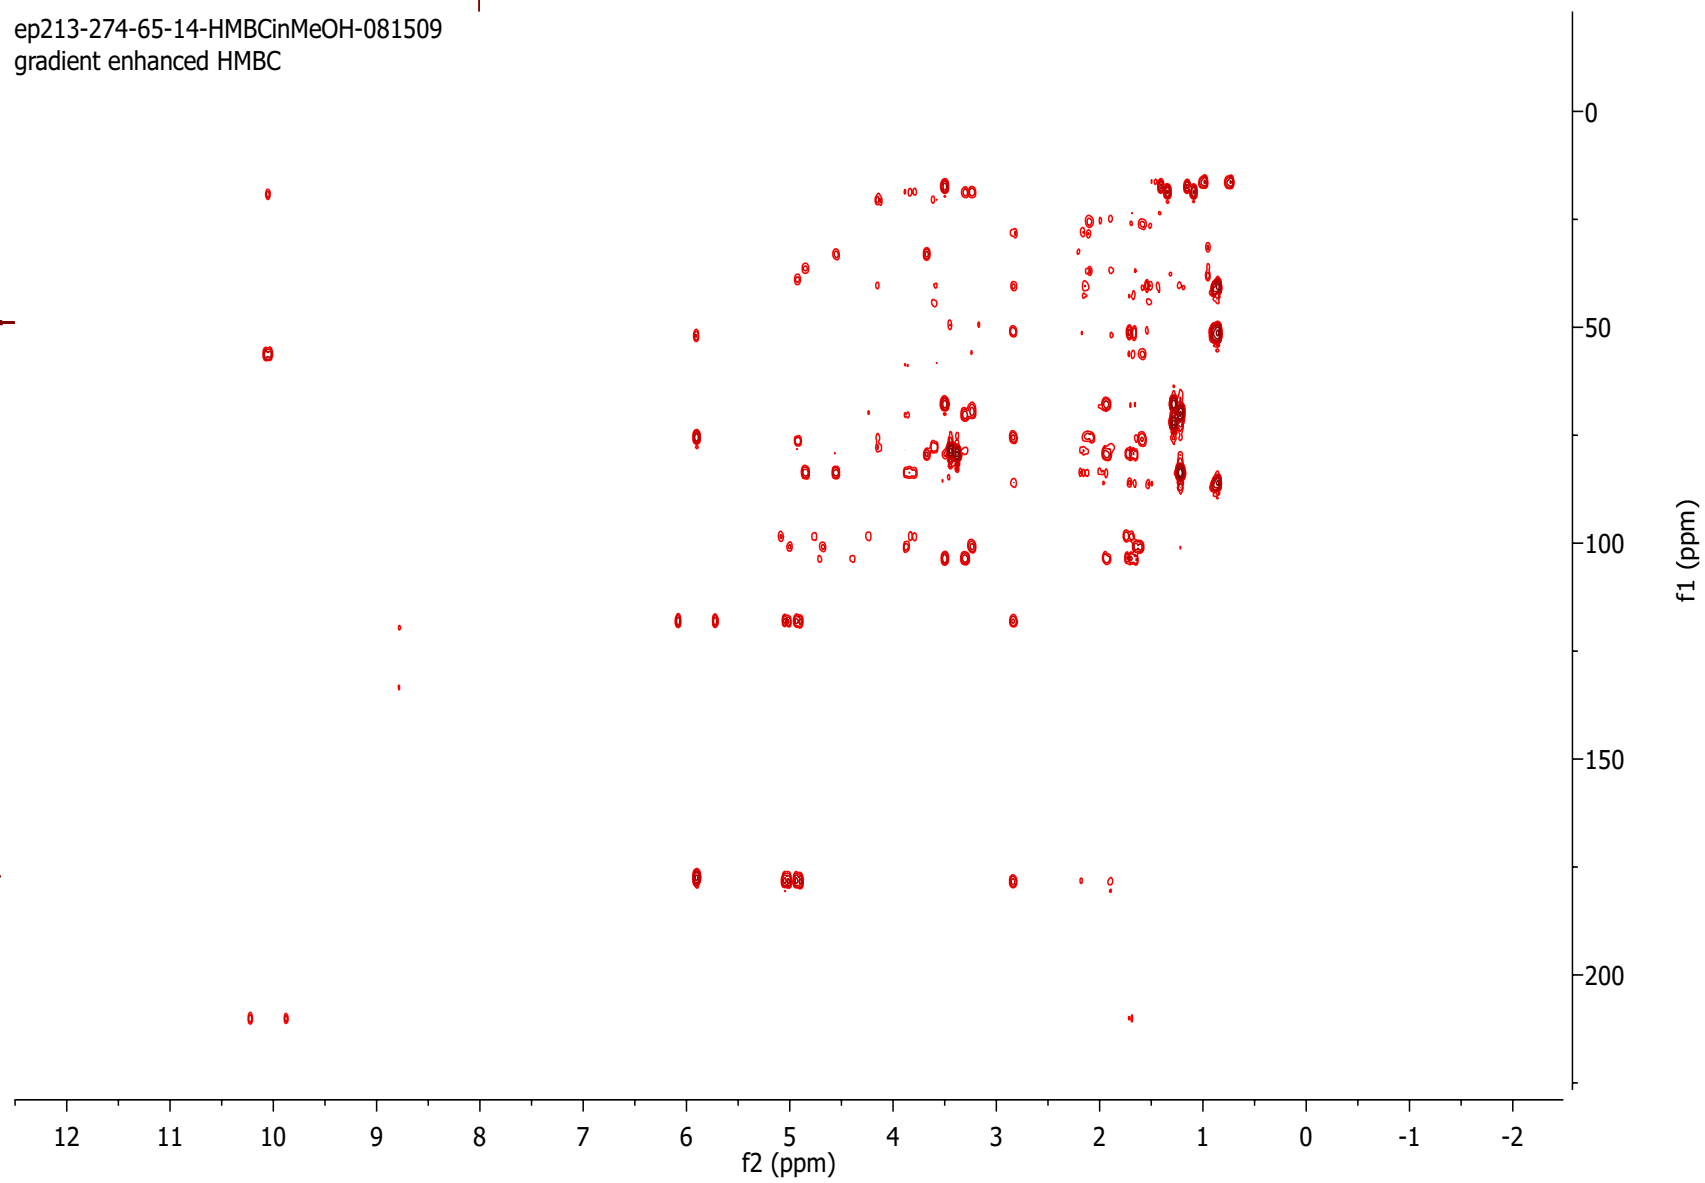

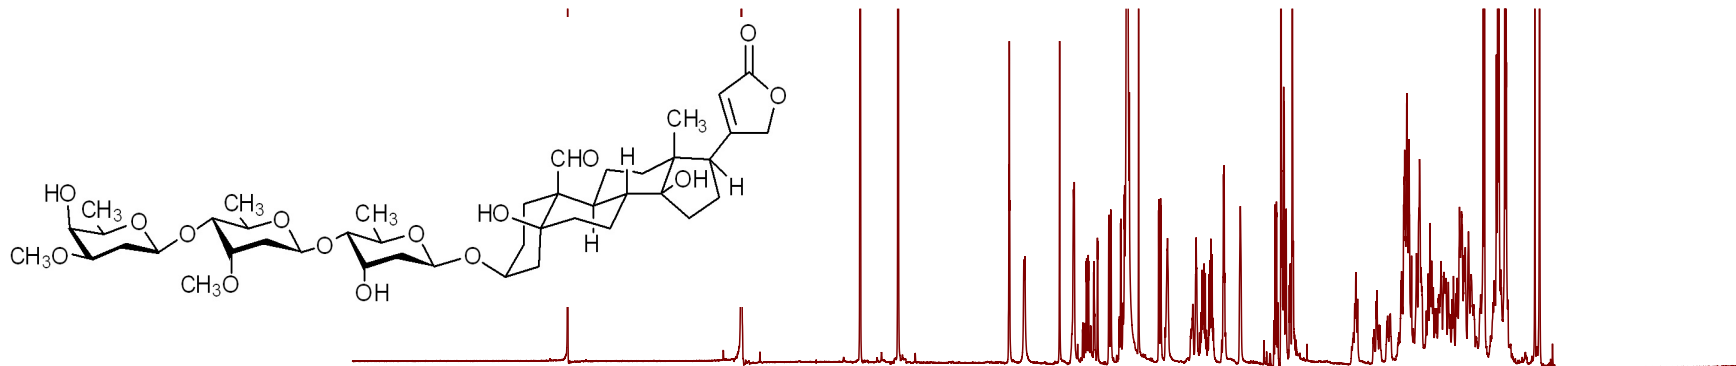

HMBC of 3 in d-Py

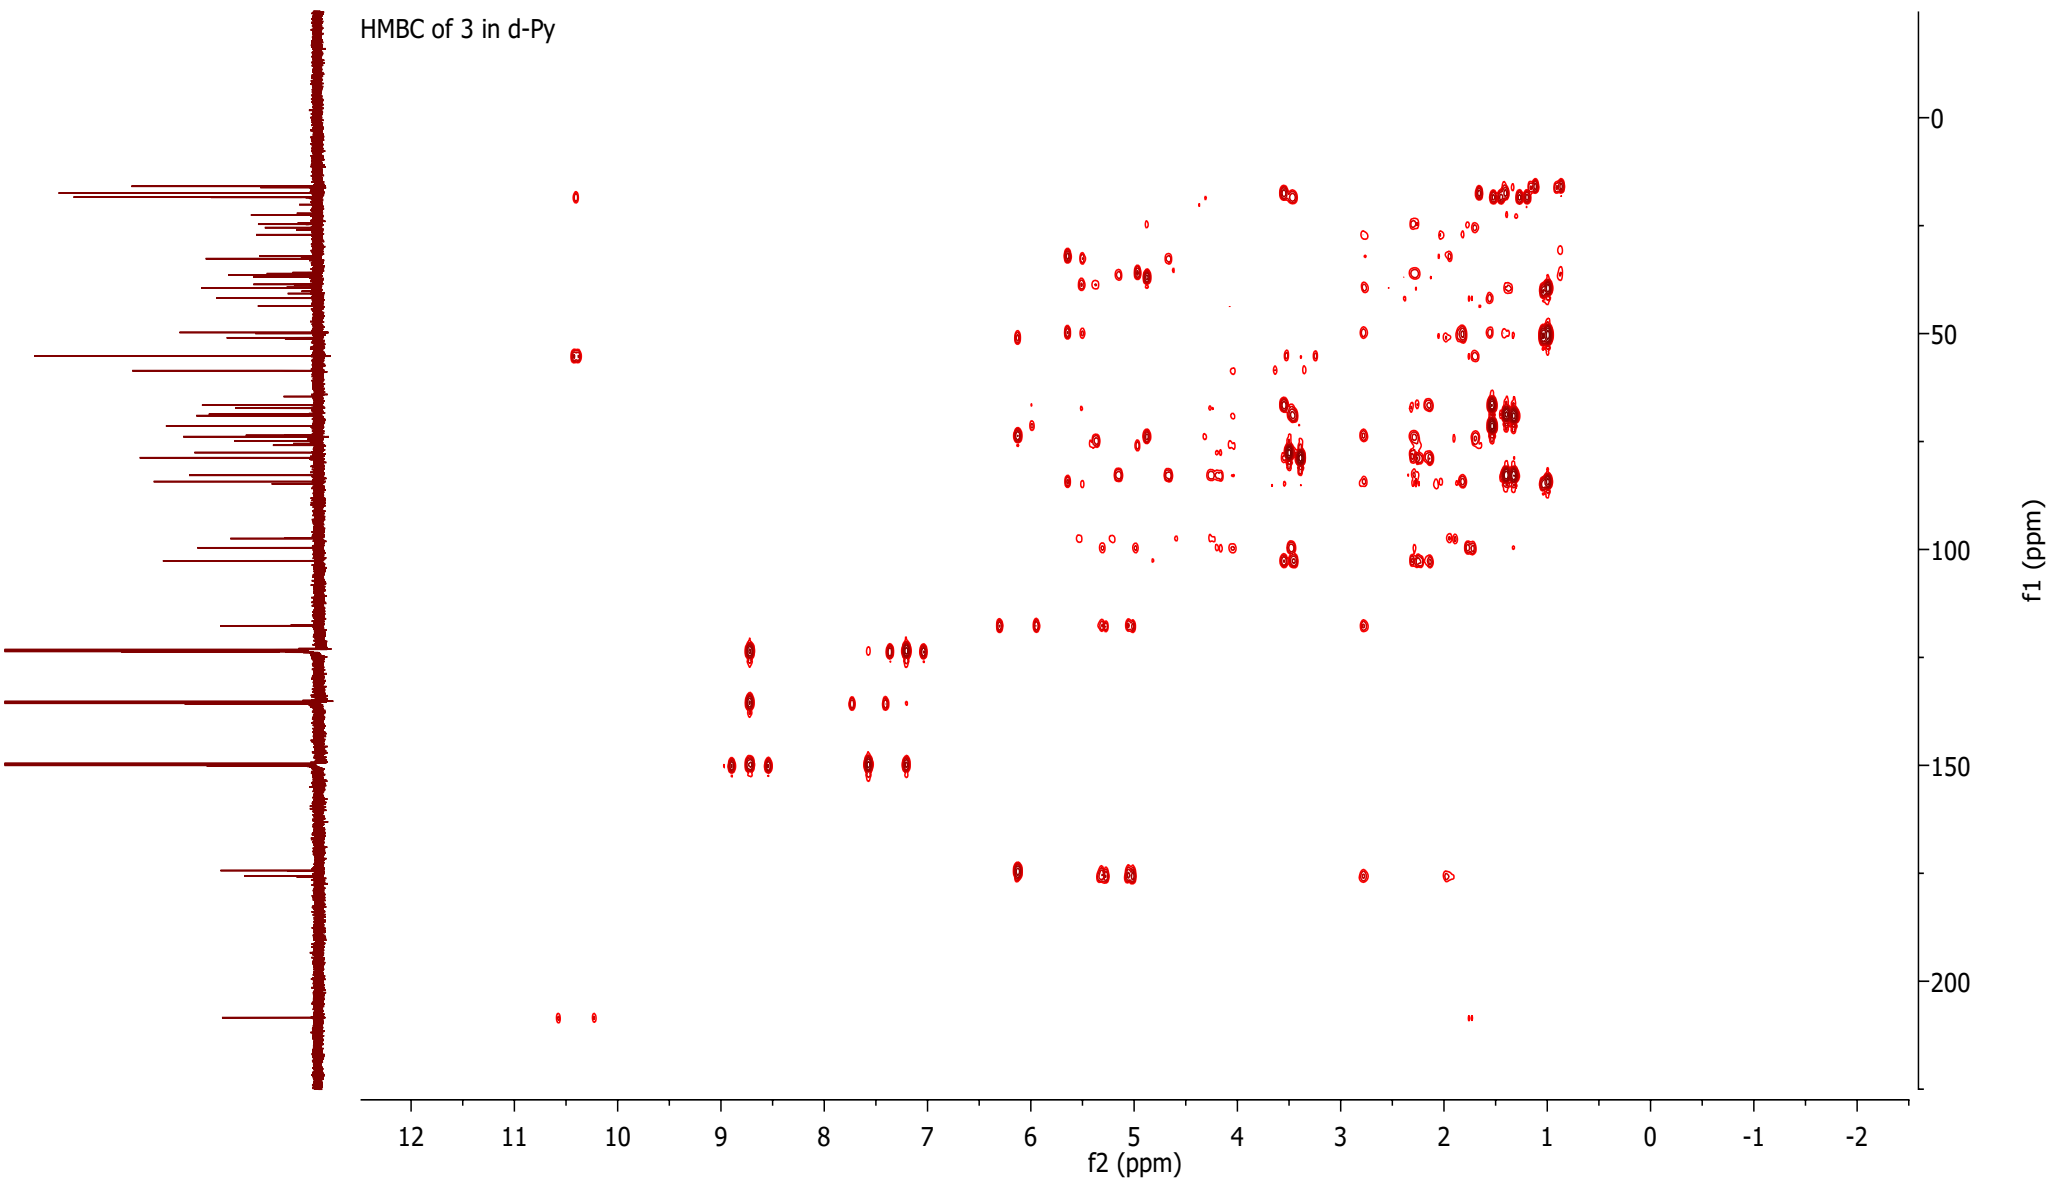

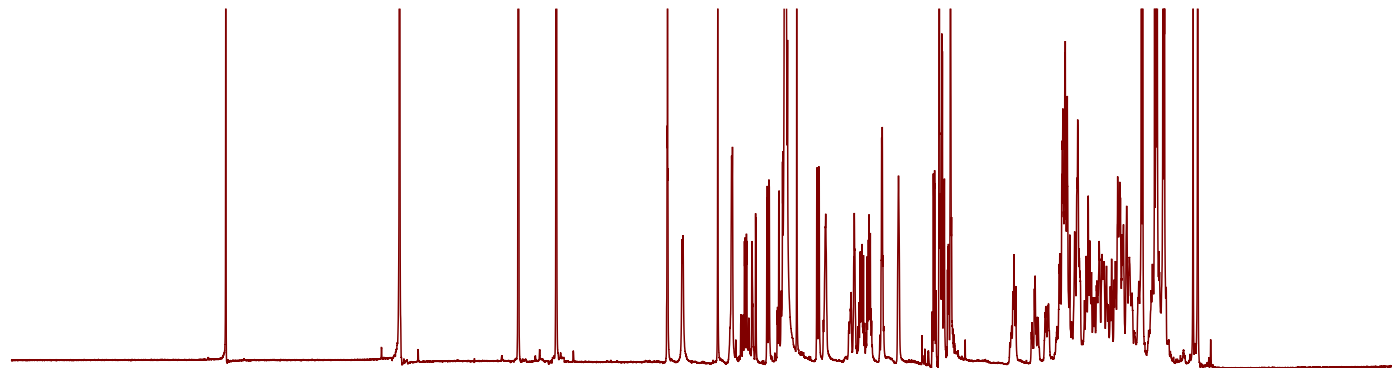

COSY of 3 in d-Py

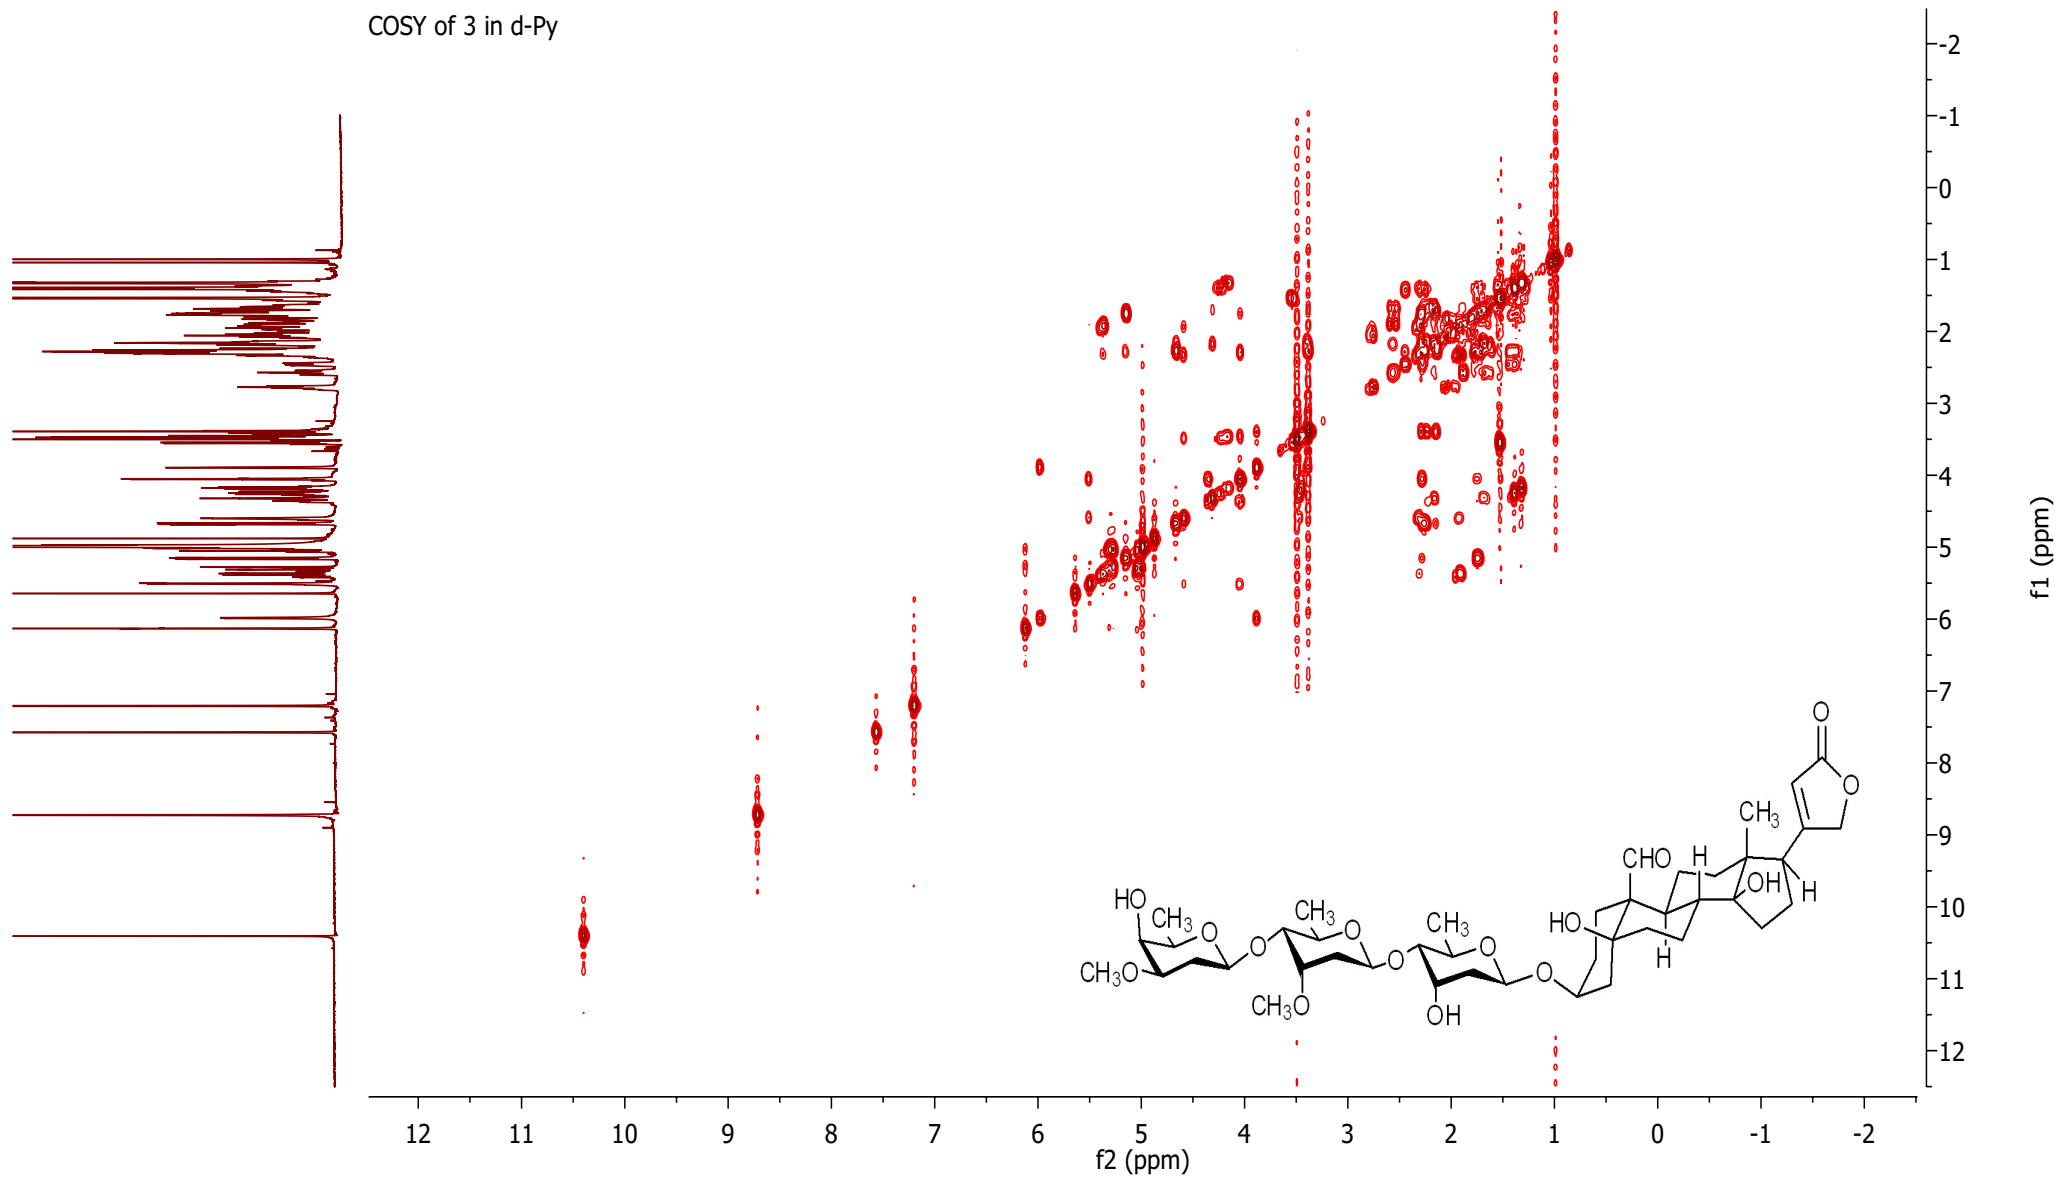

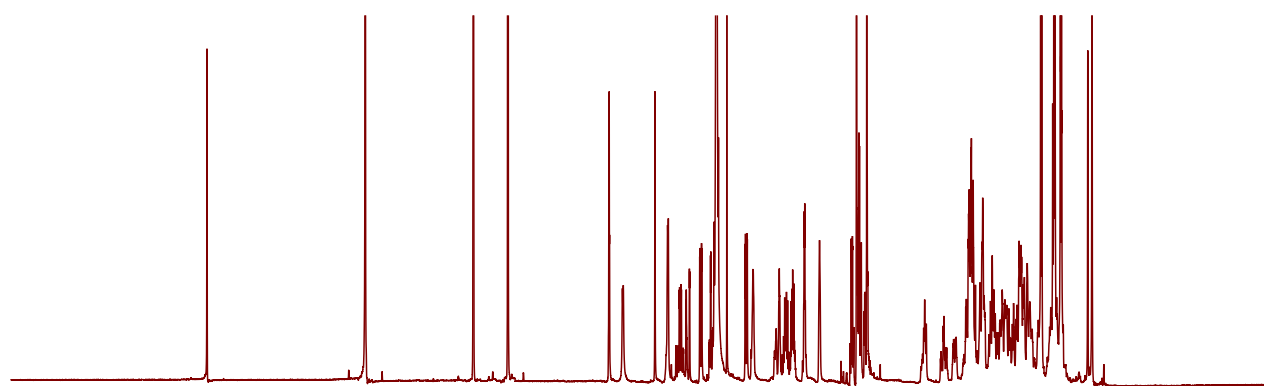

HMQC of 3 in d-Py

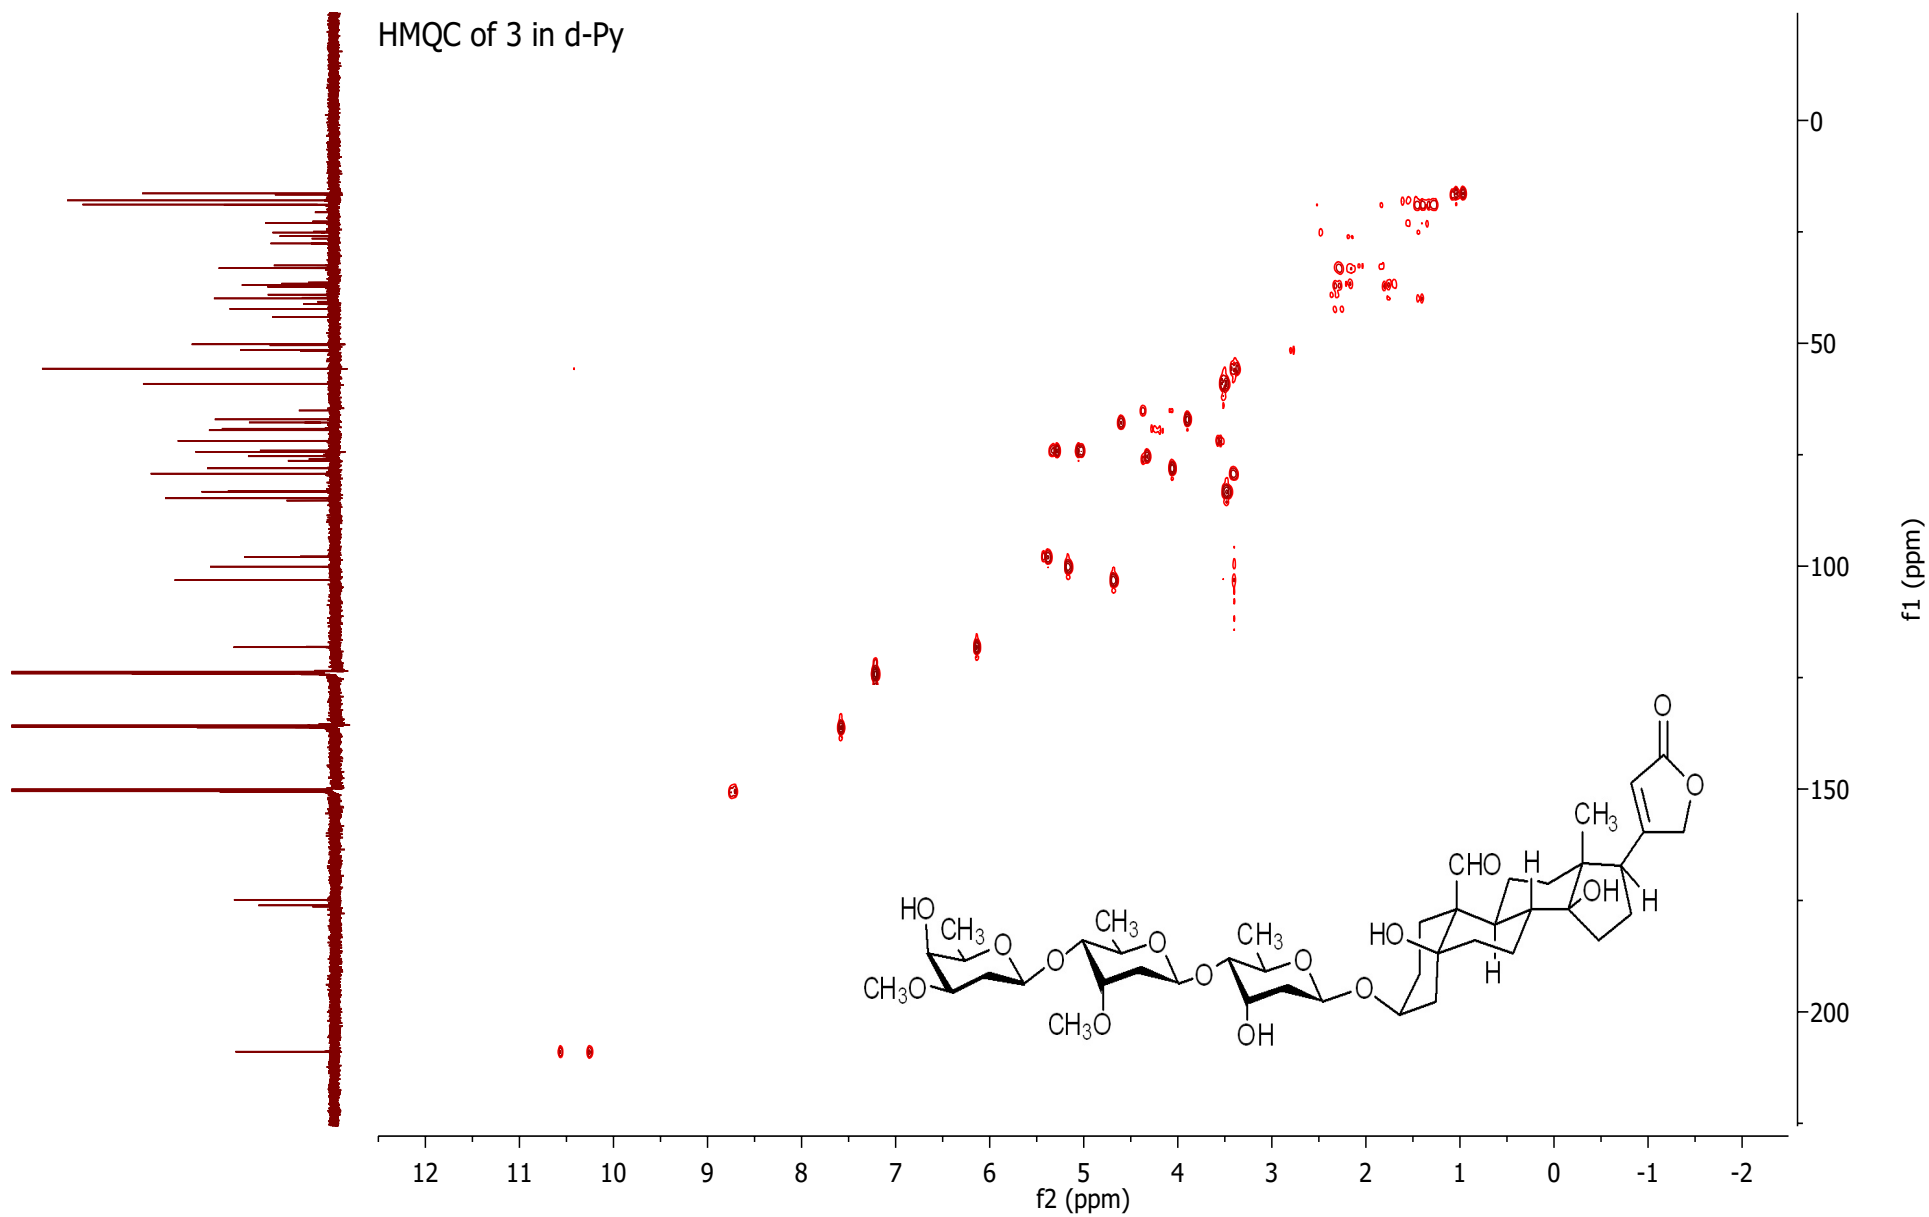

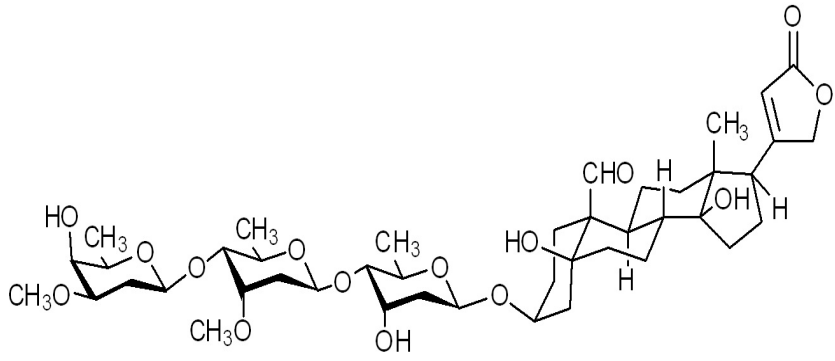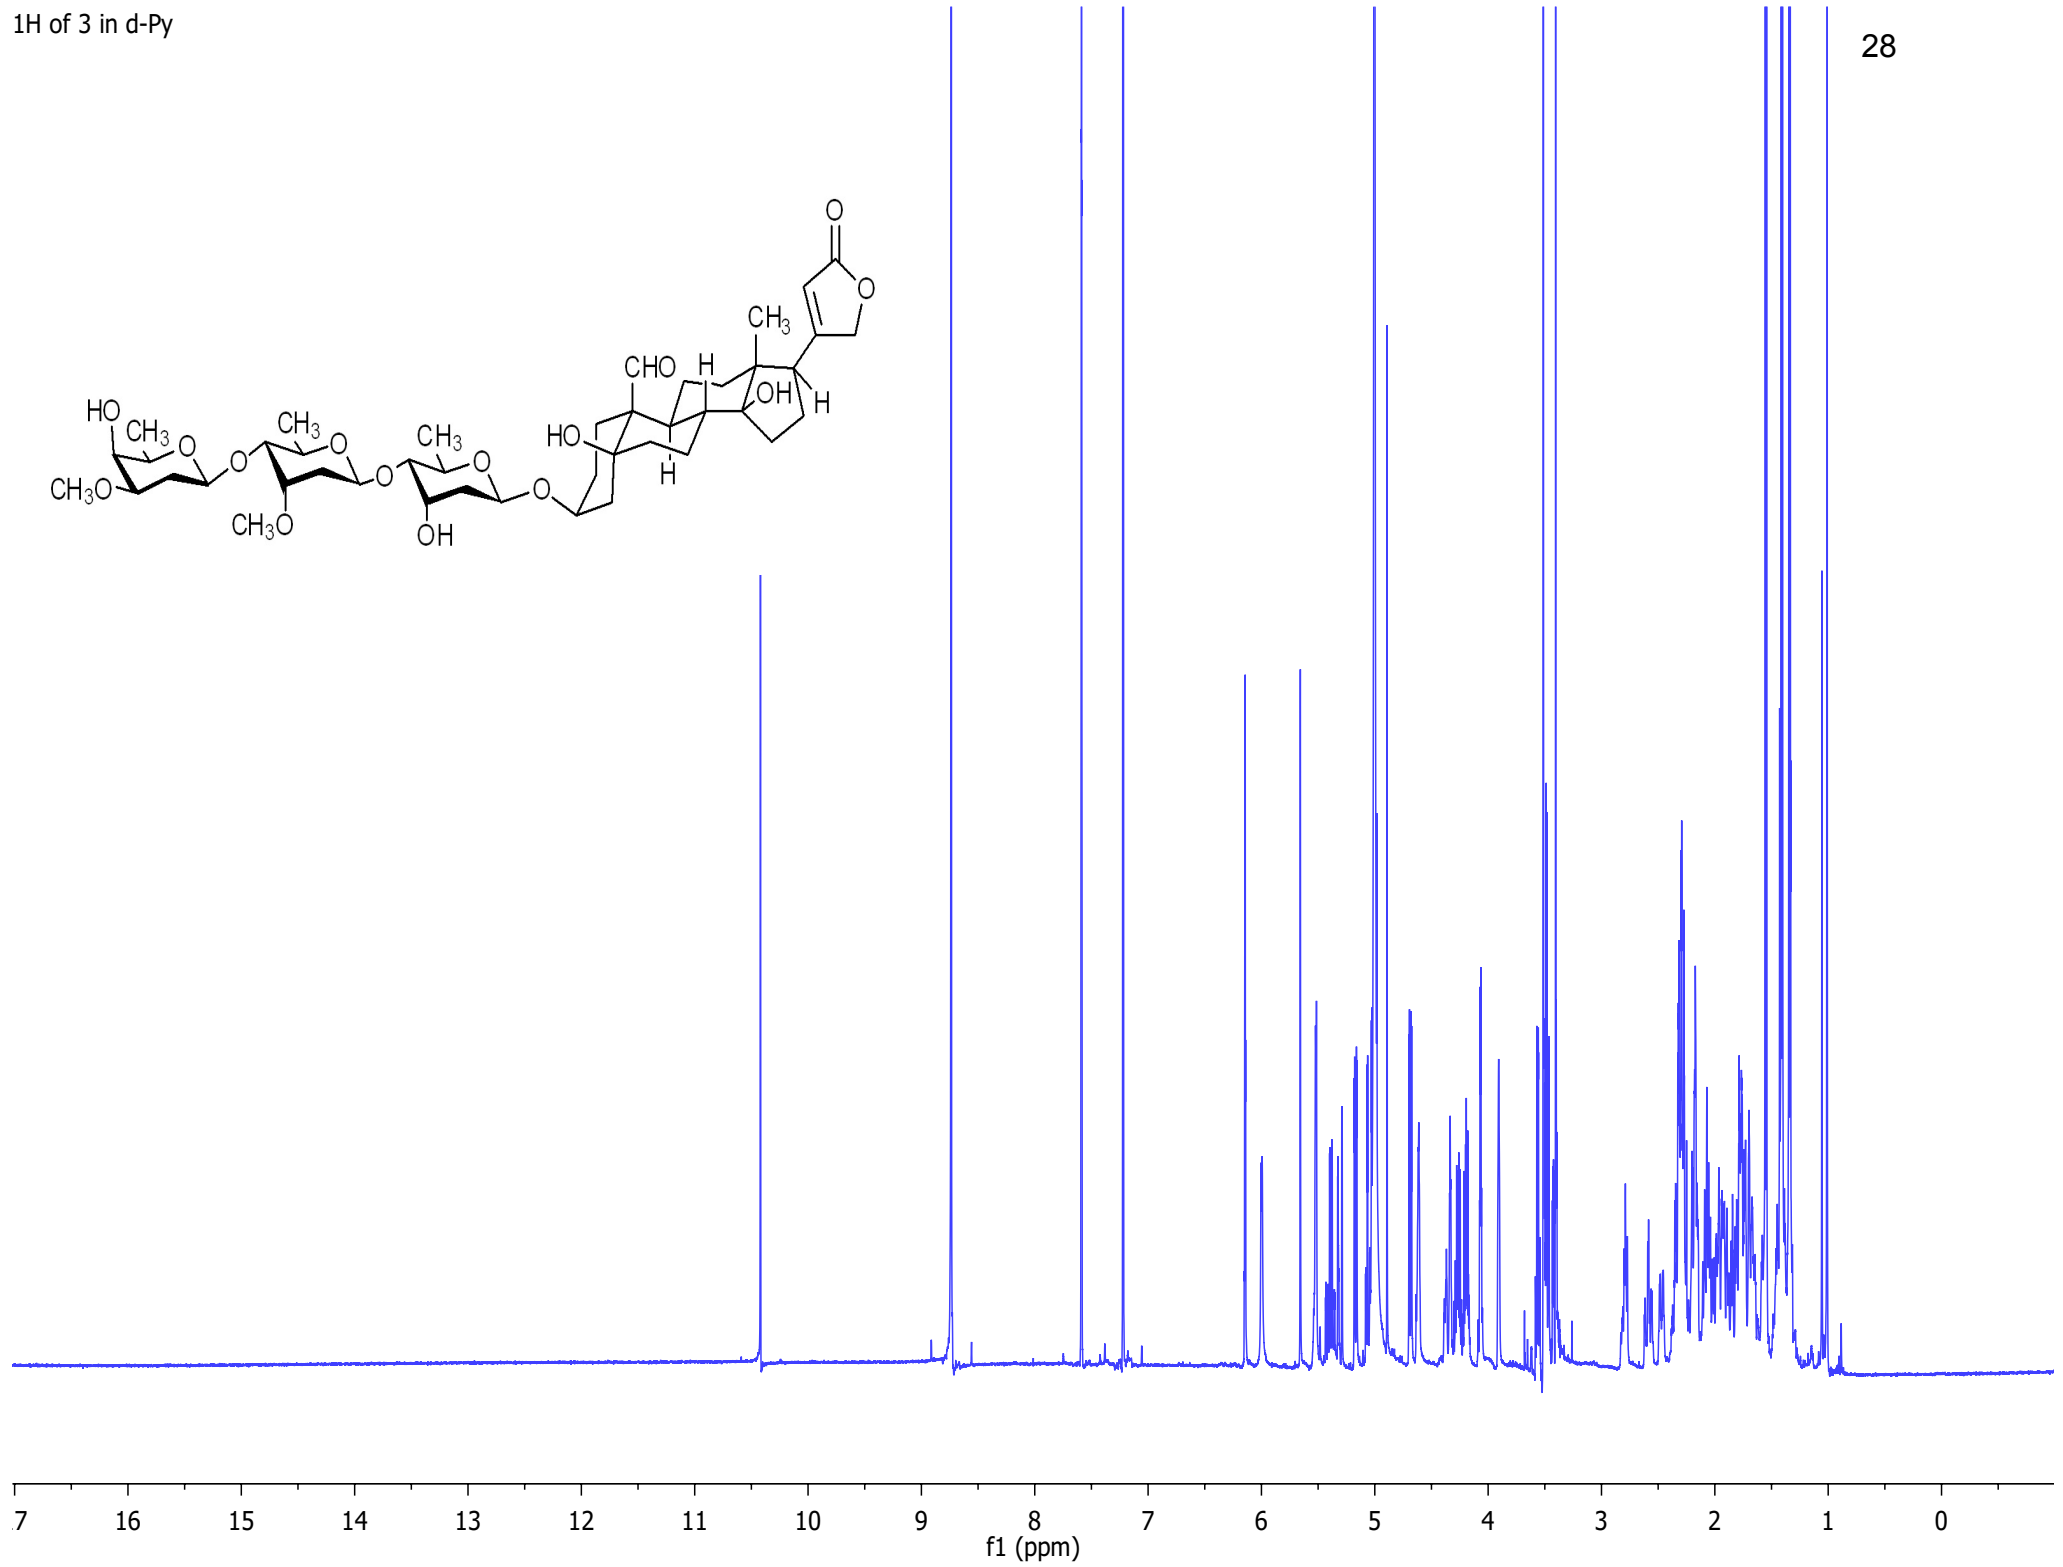

TOCSY of 3 in d-Py

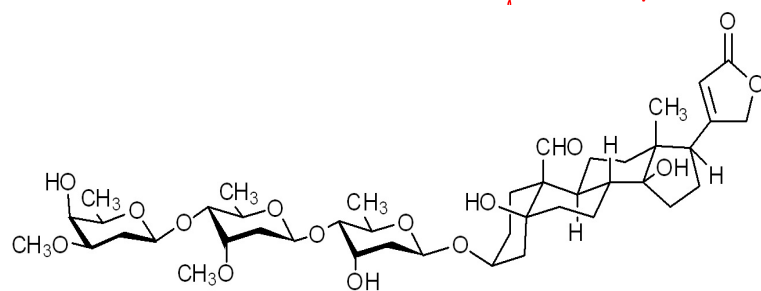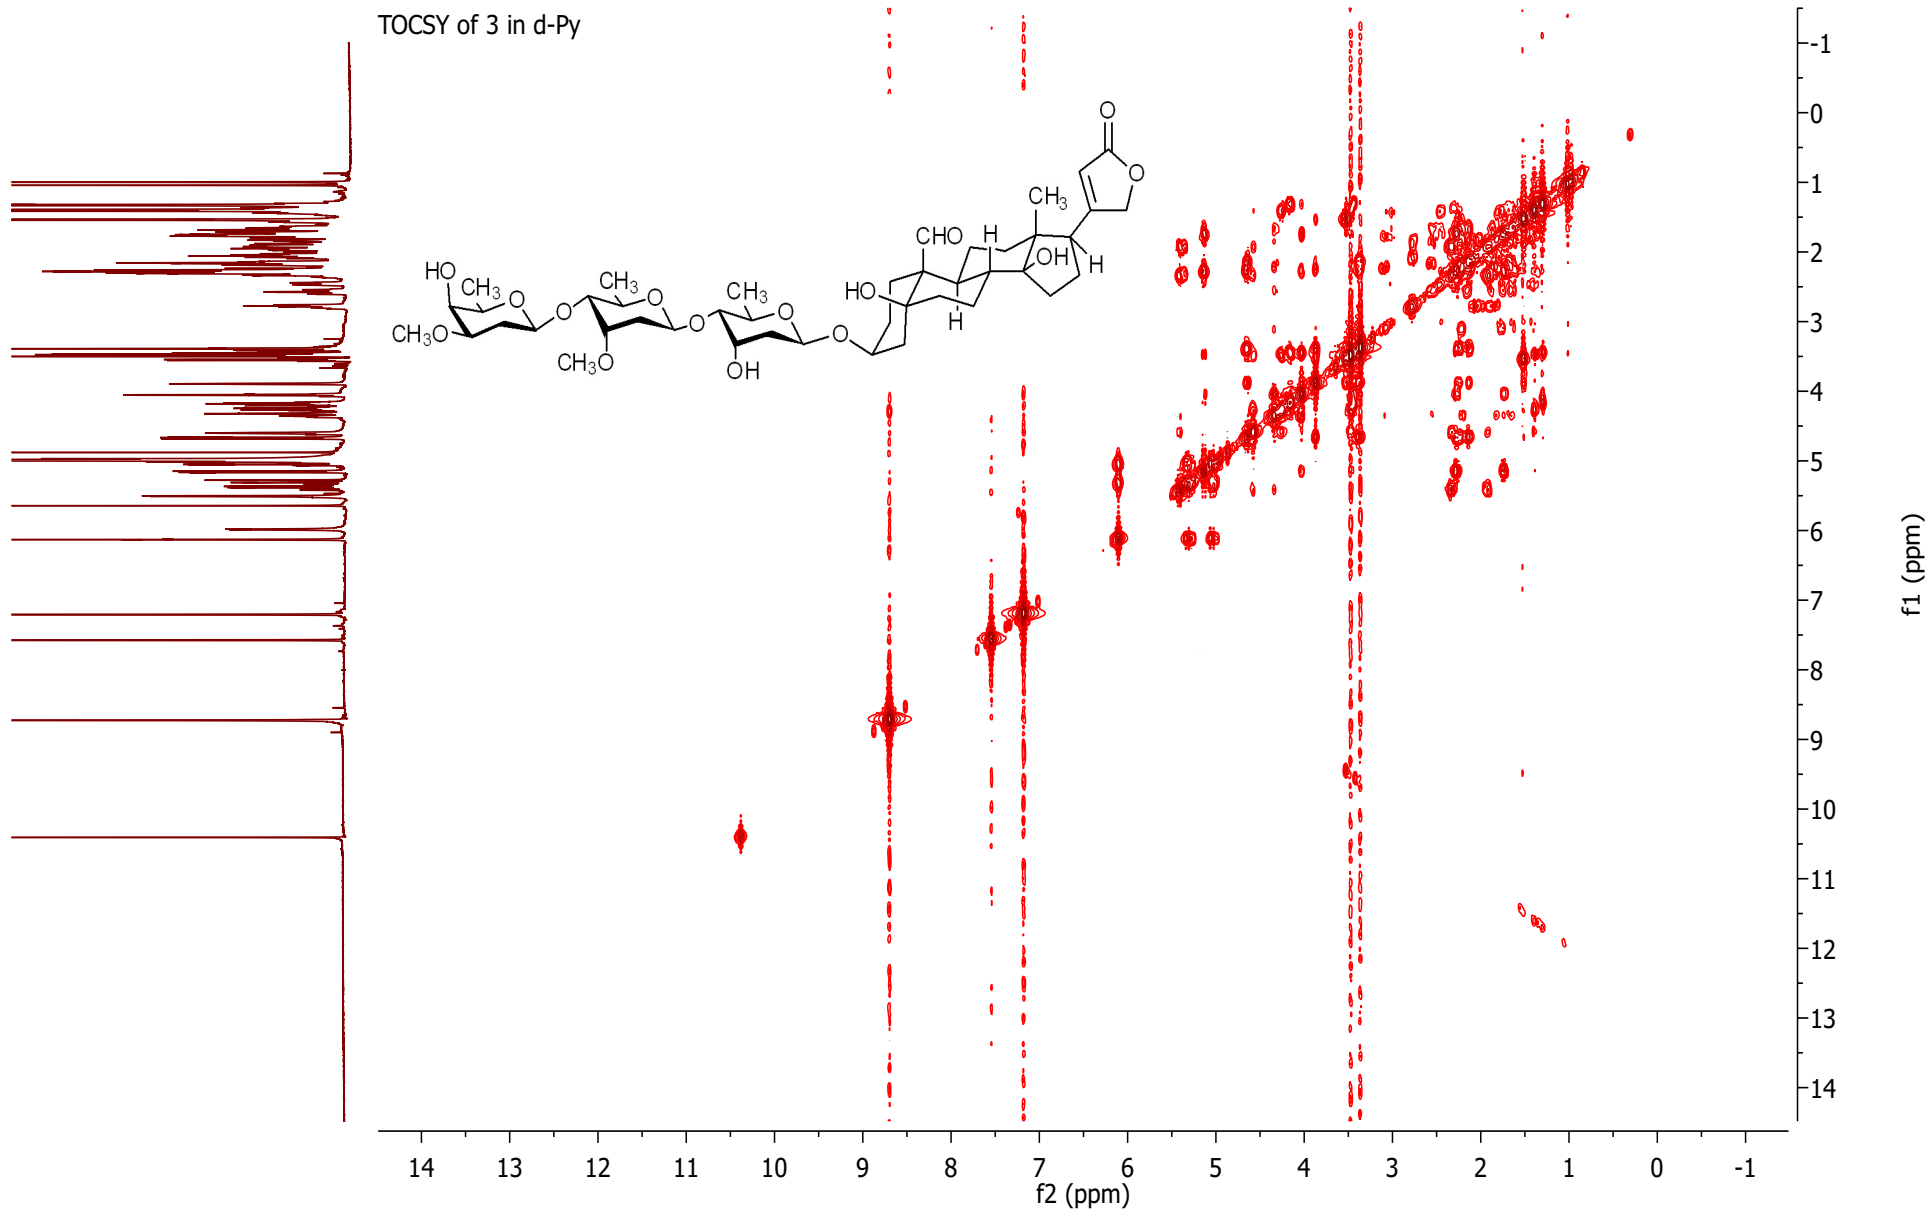

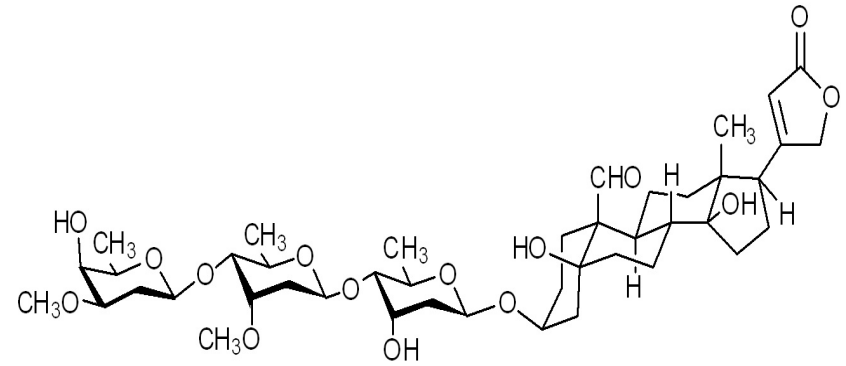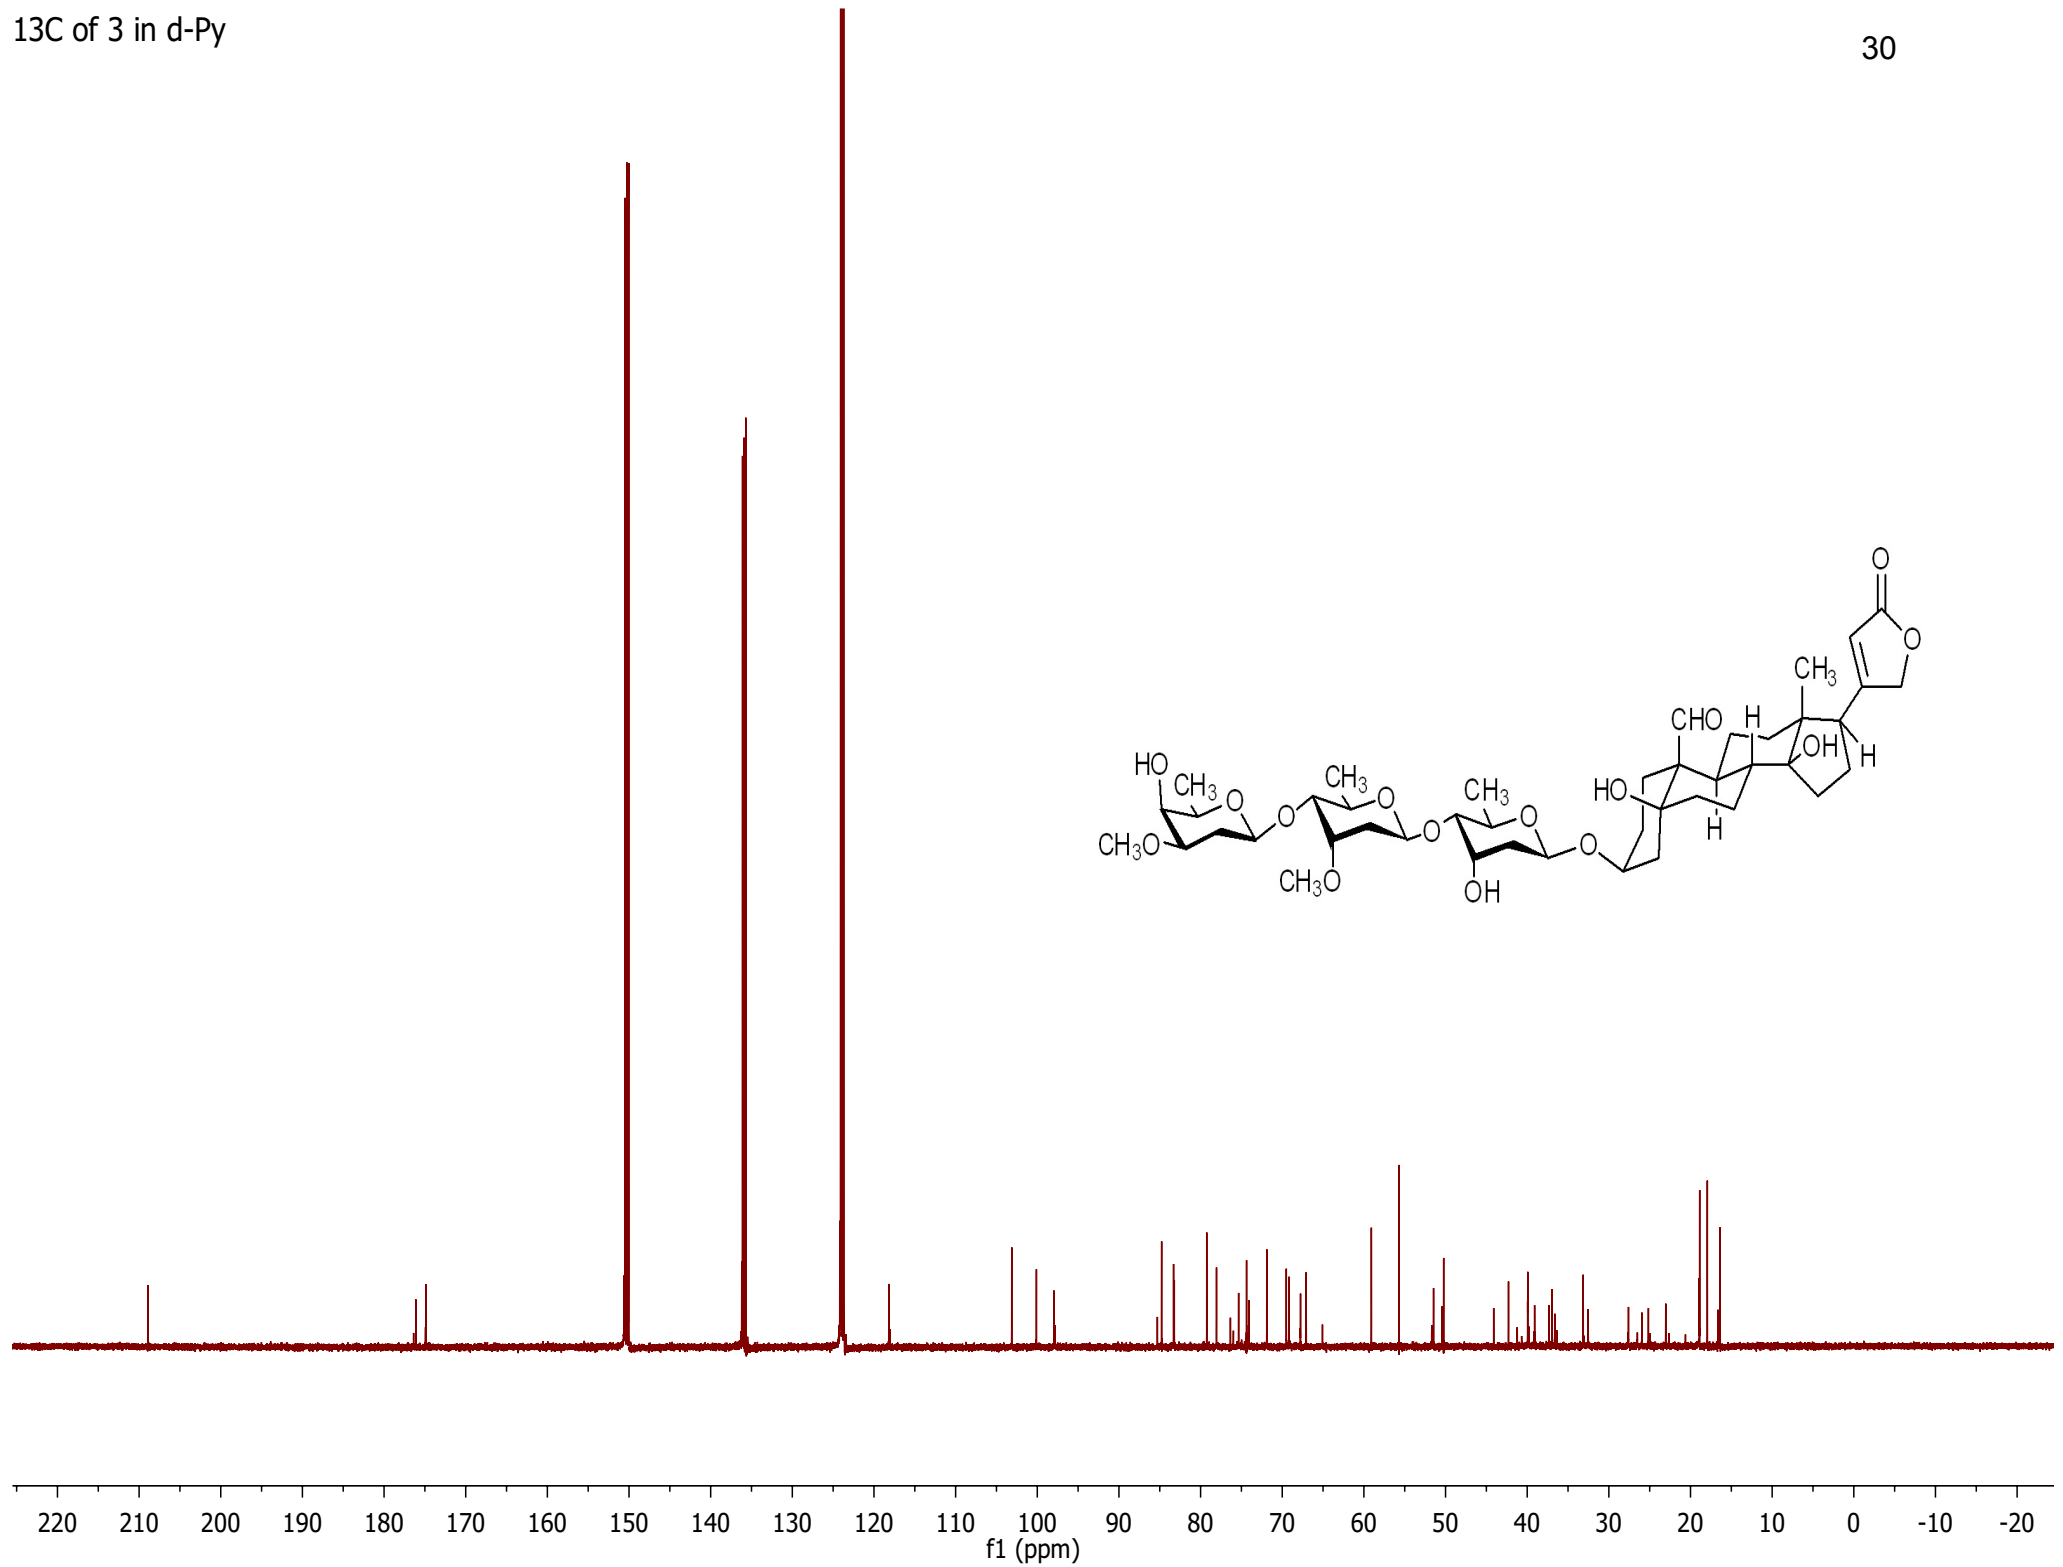

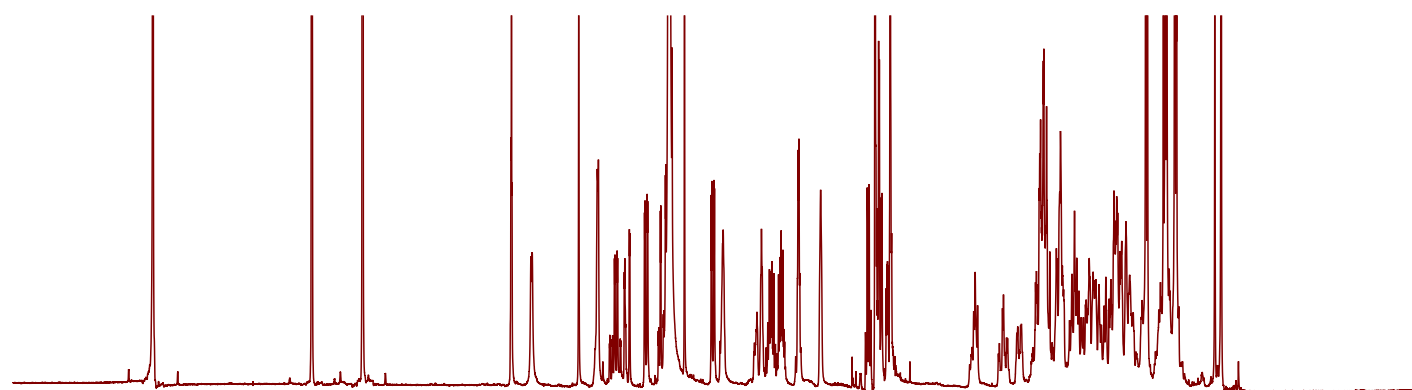ROESY of 3 in  $d\text{-Py}$ 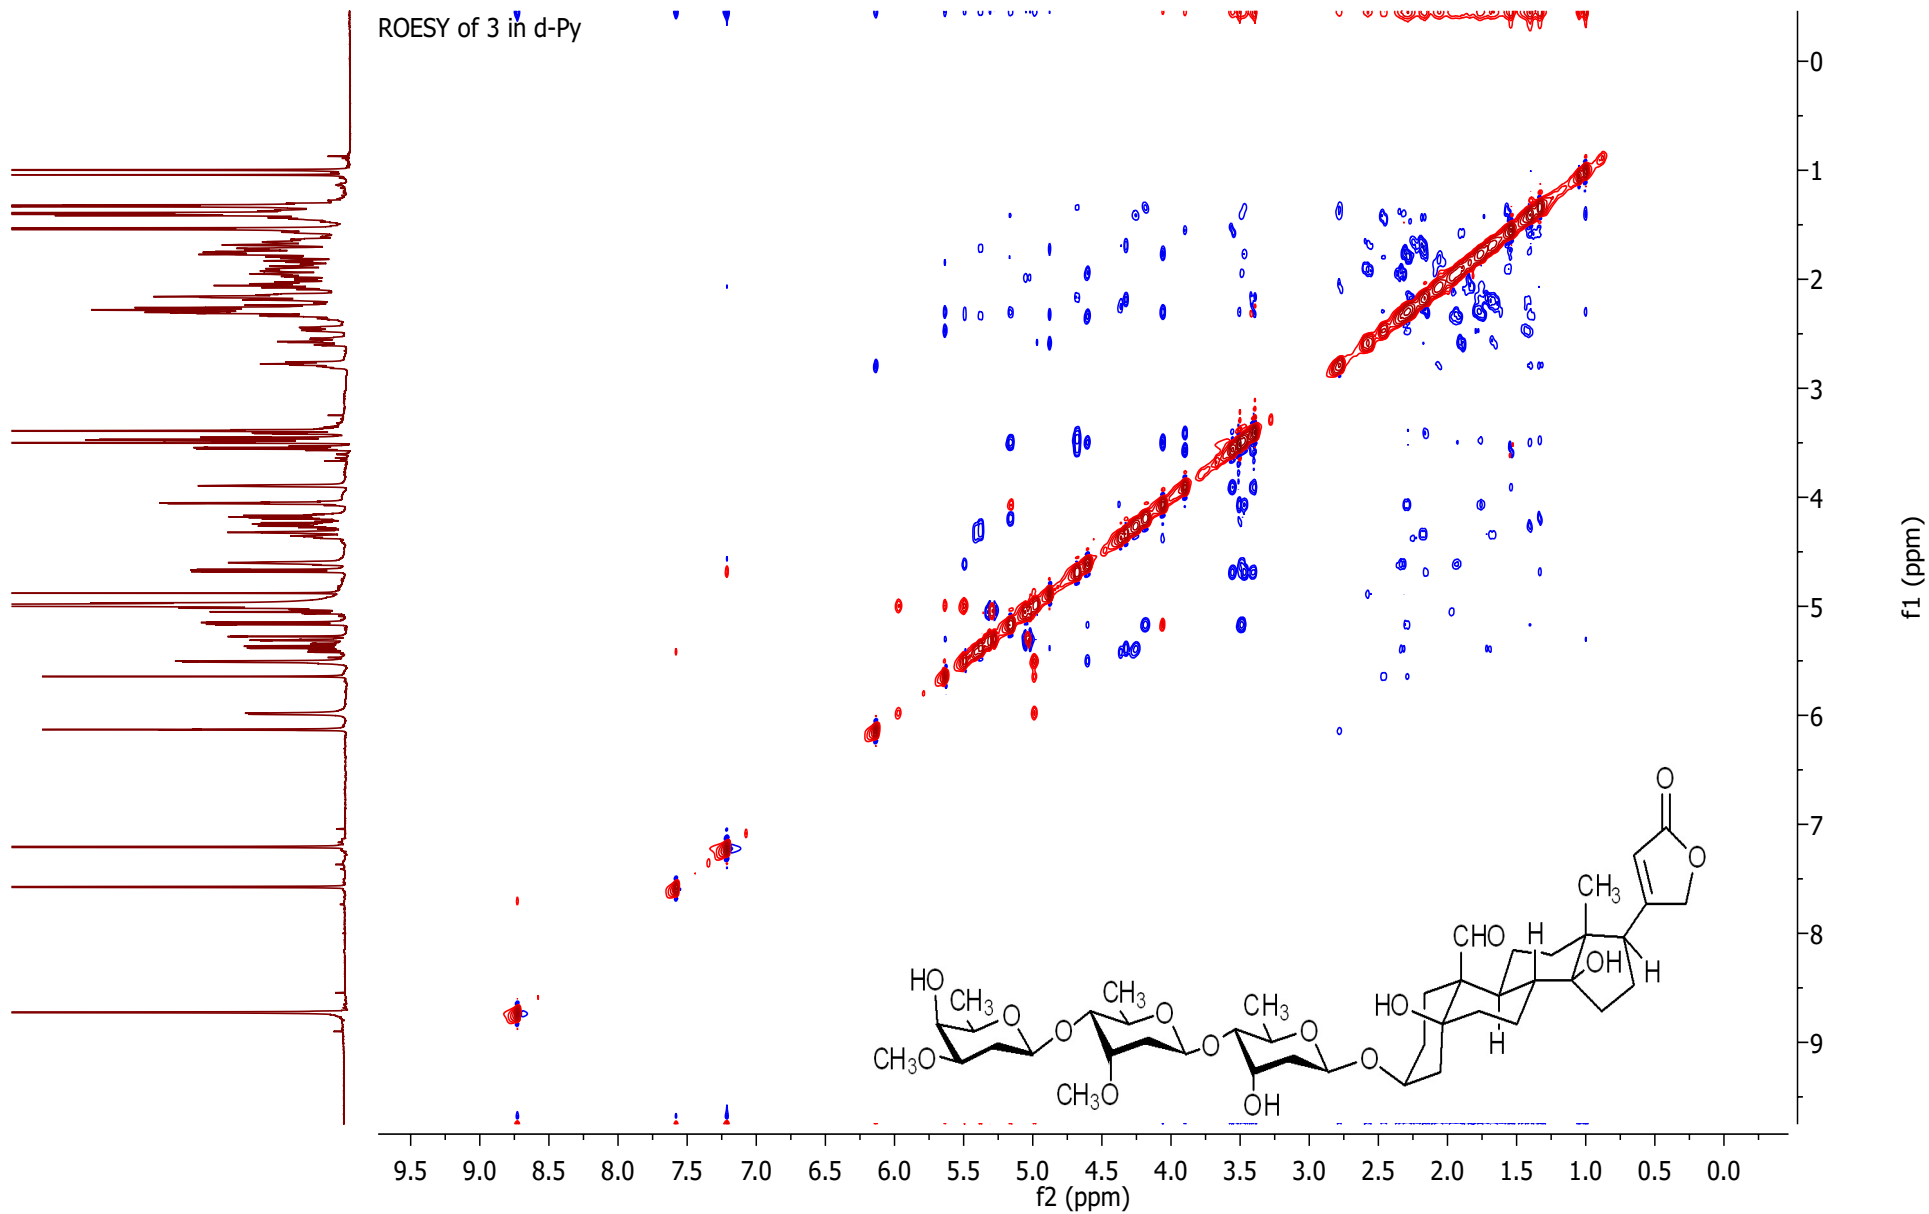



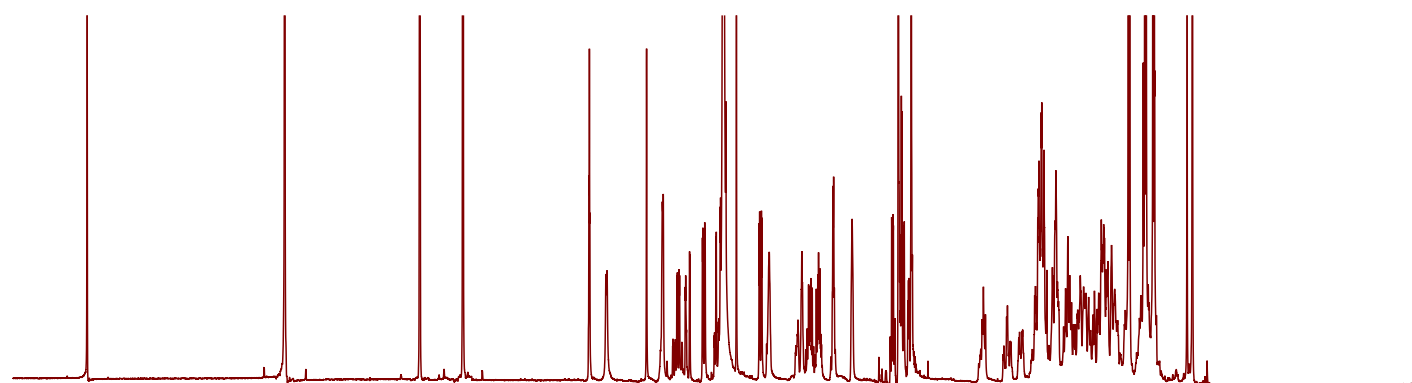

ROESY of 3 in d-Py

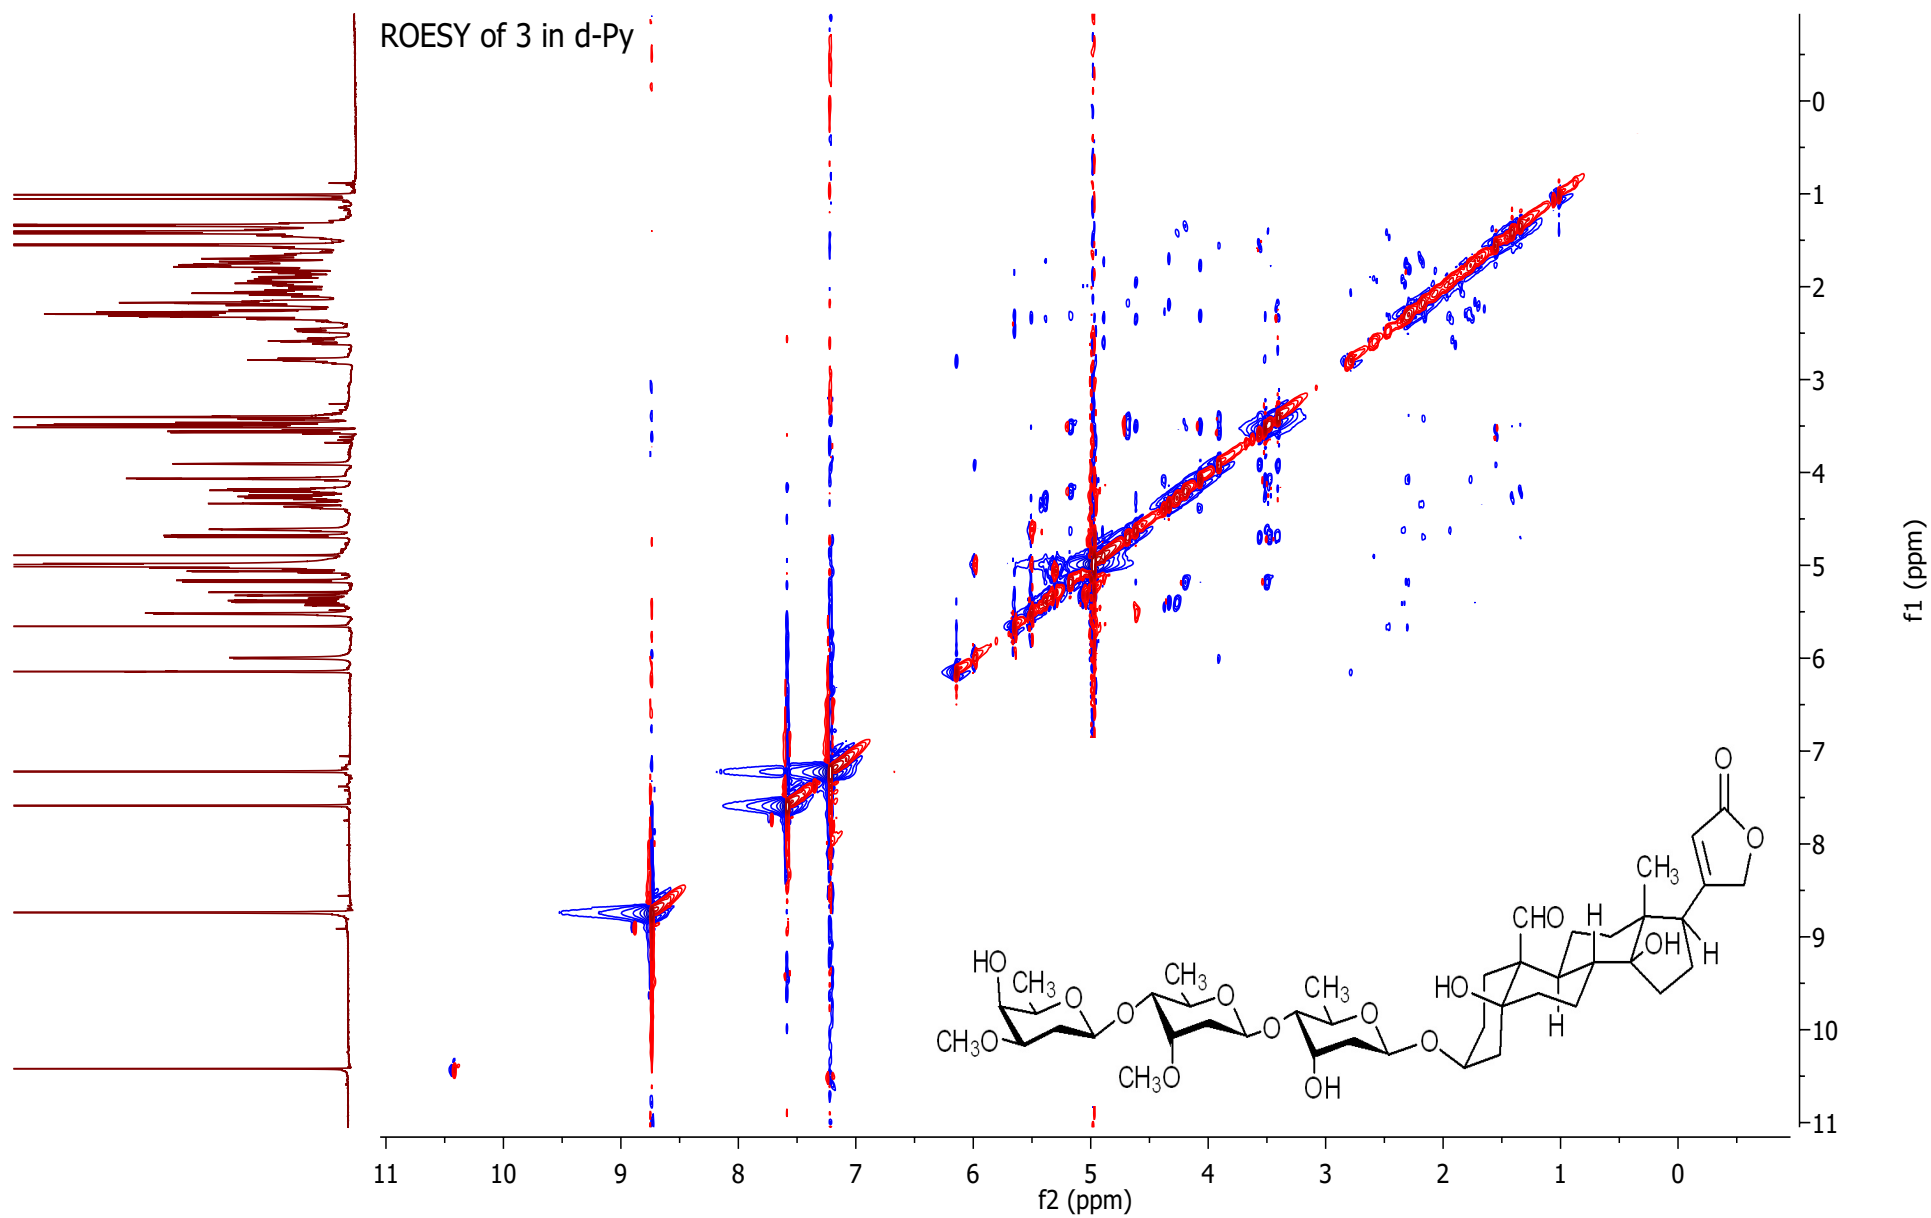

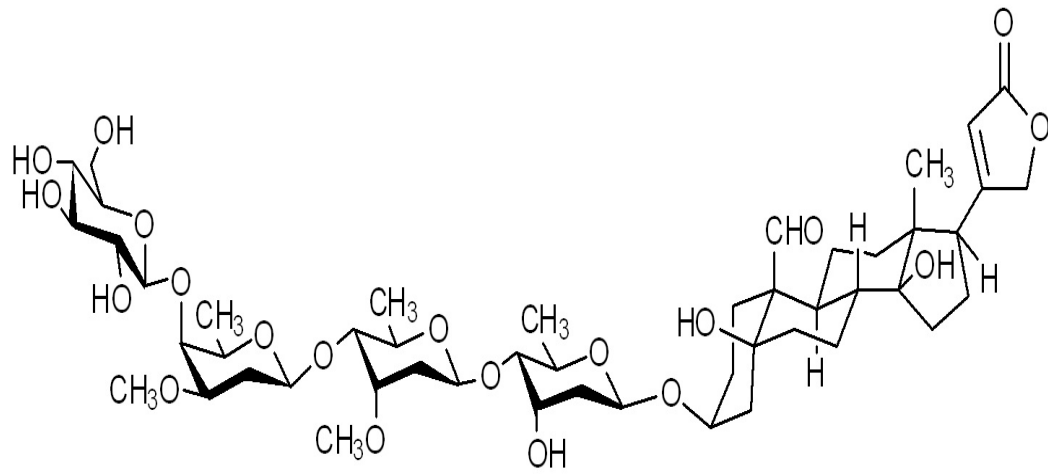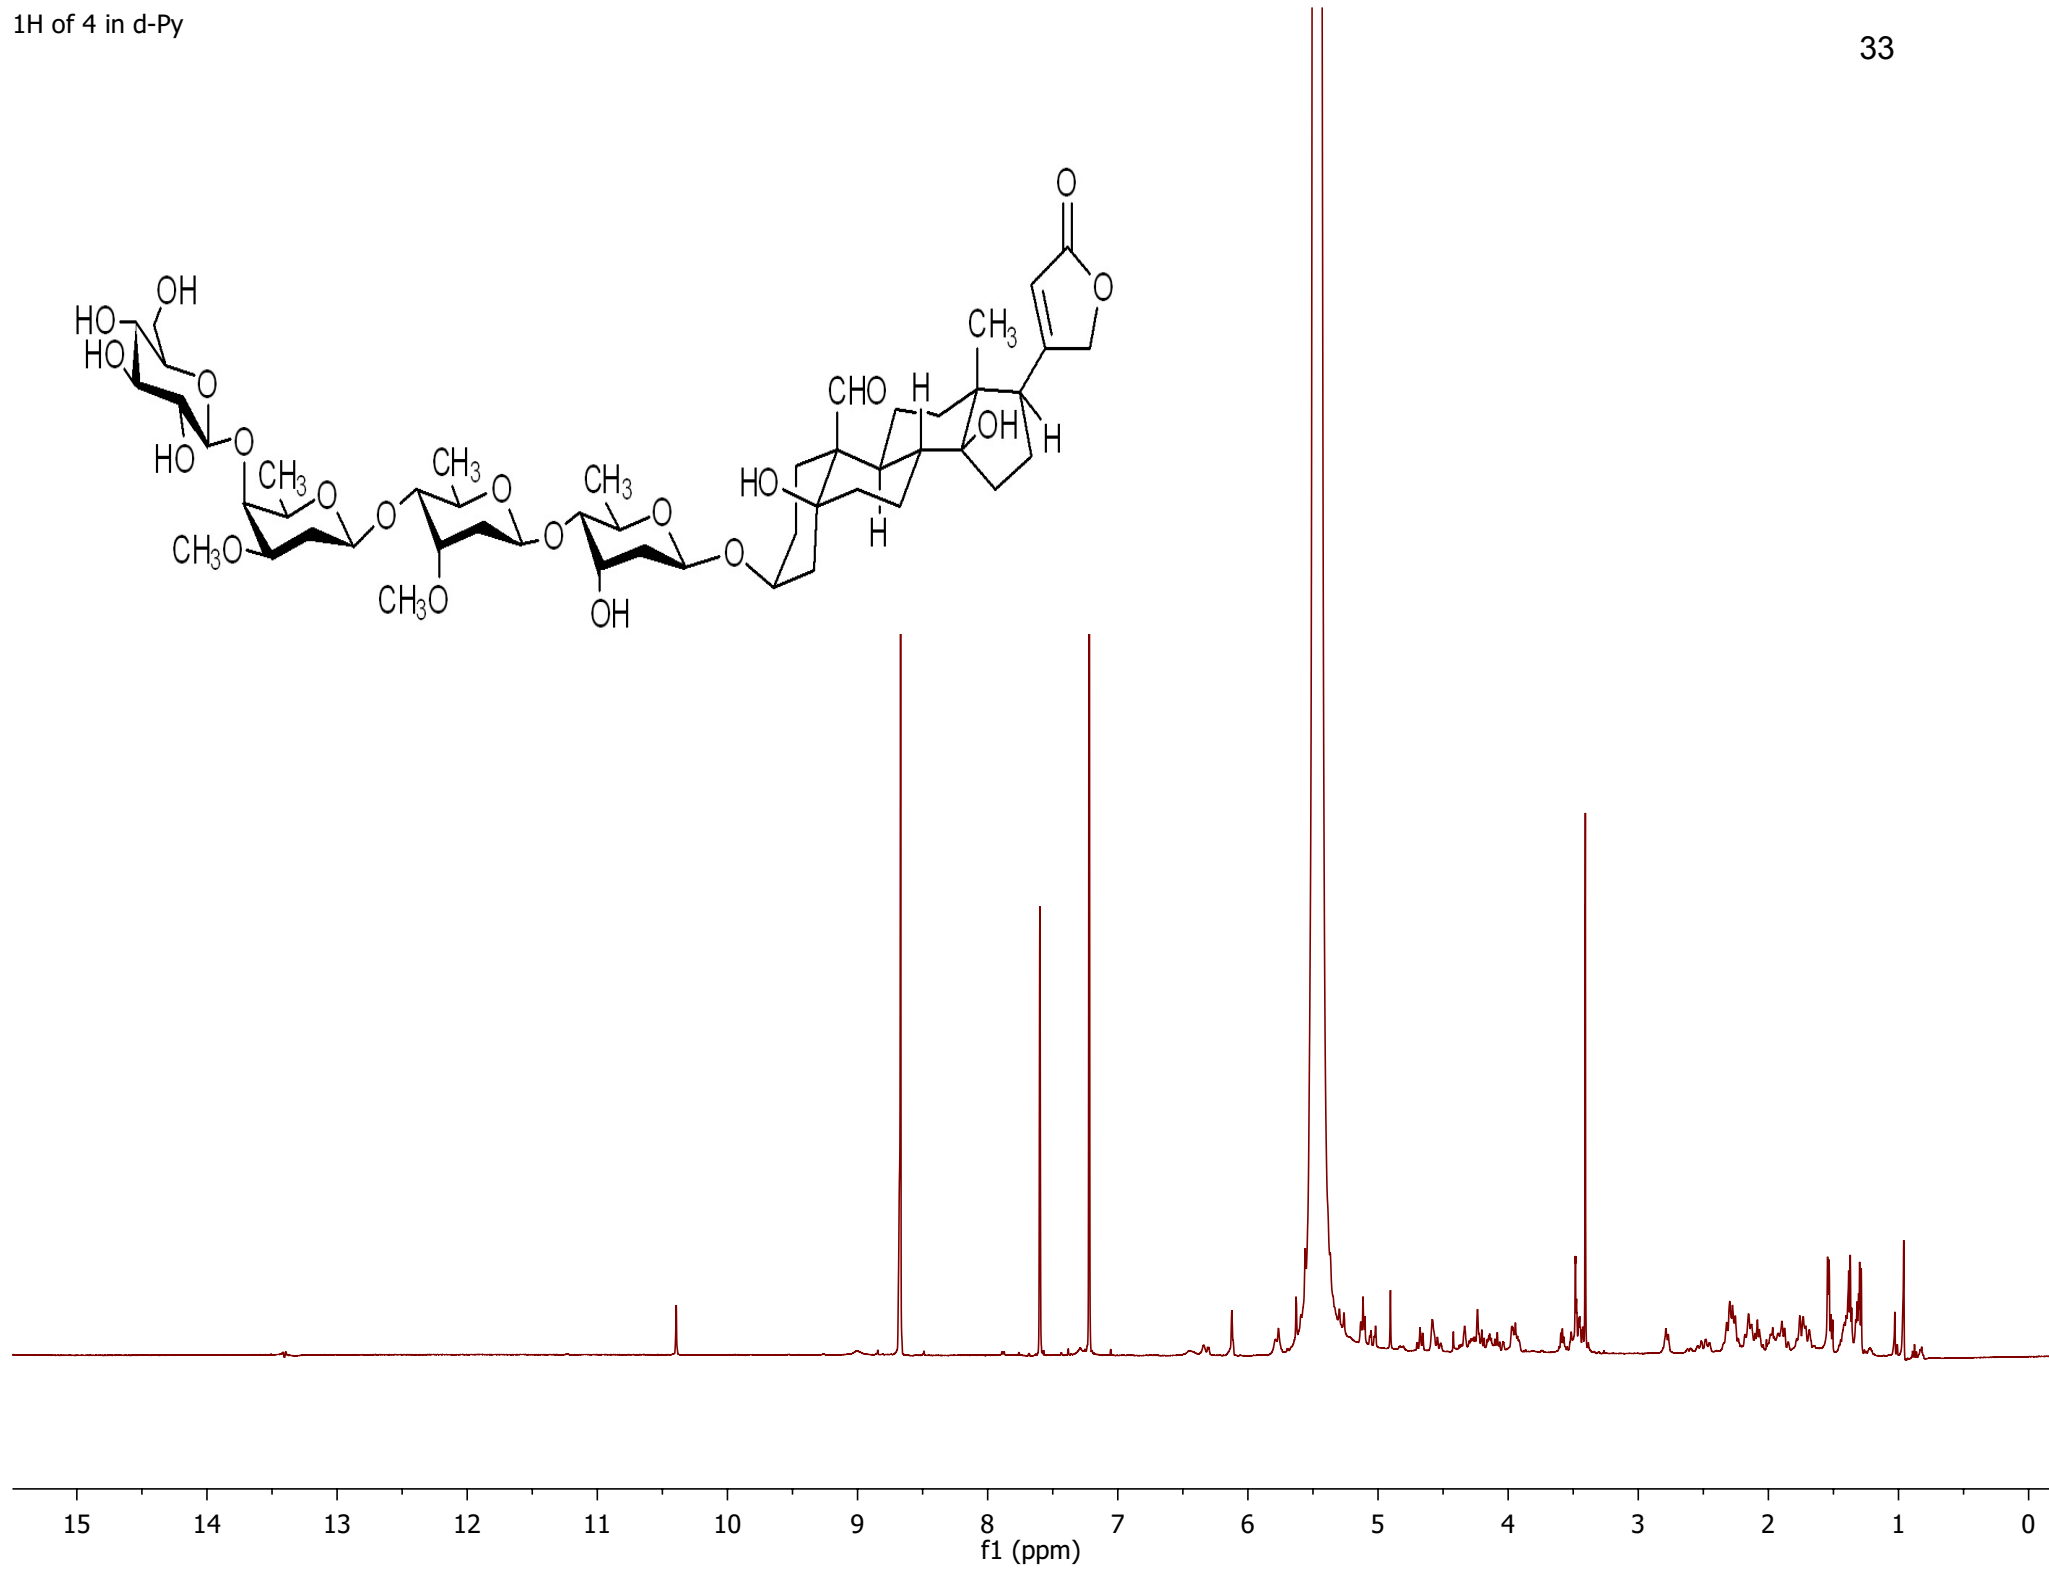

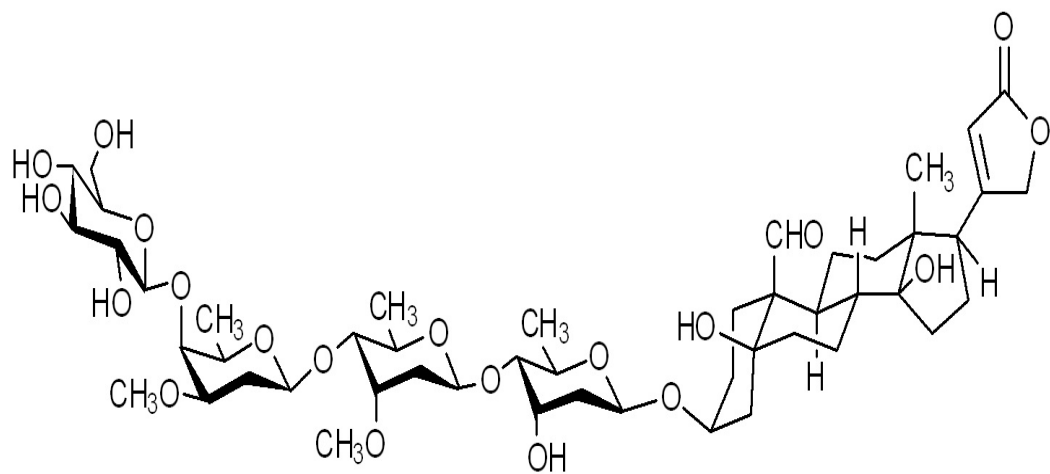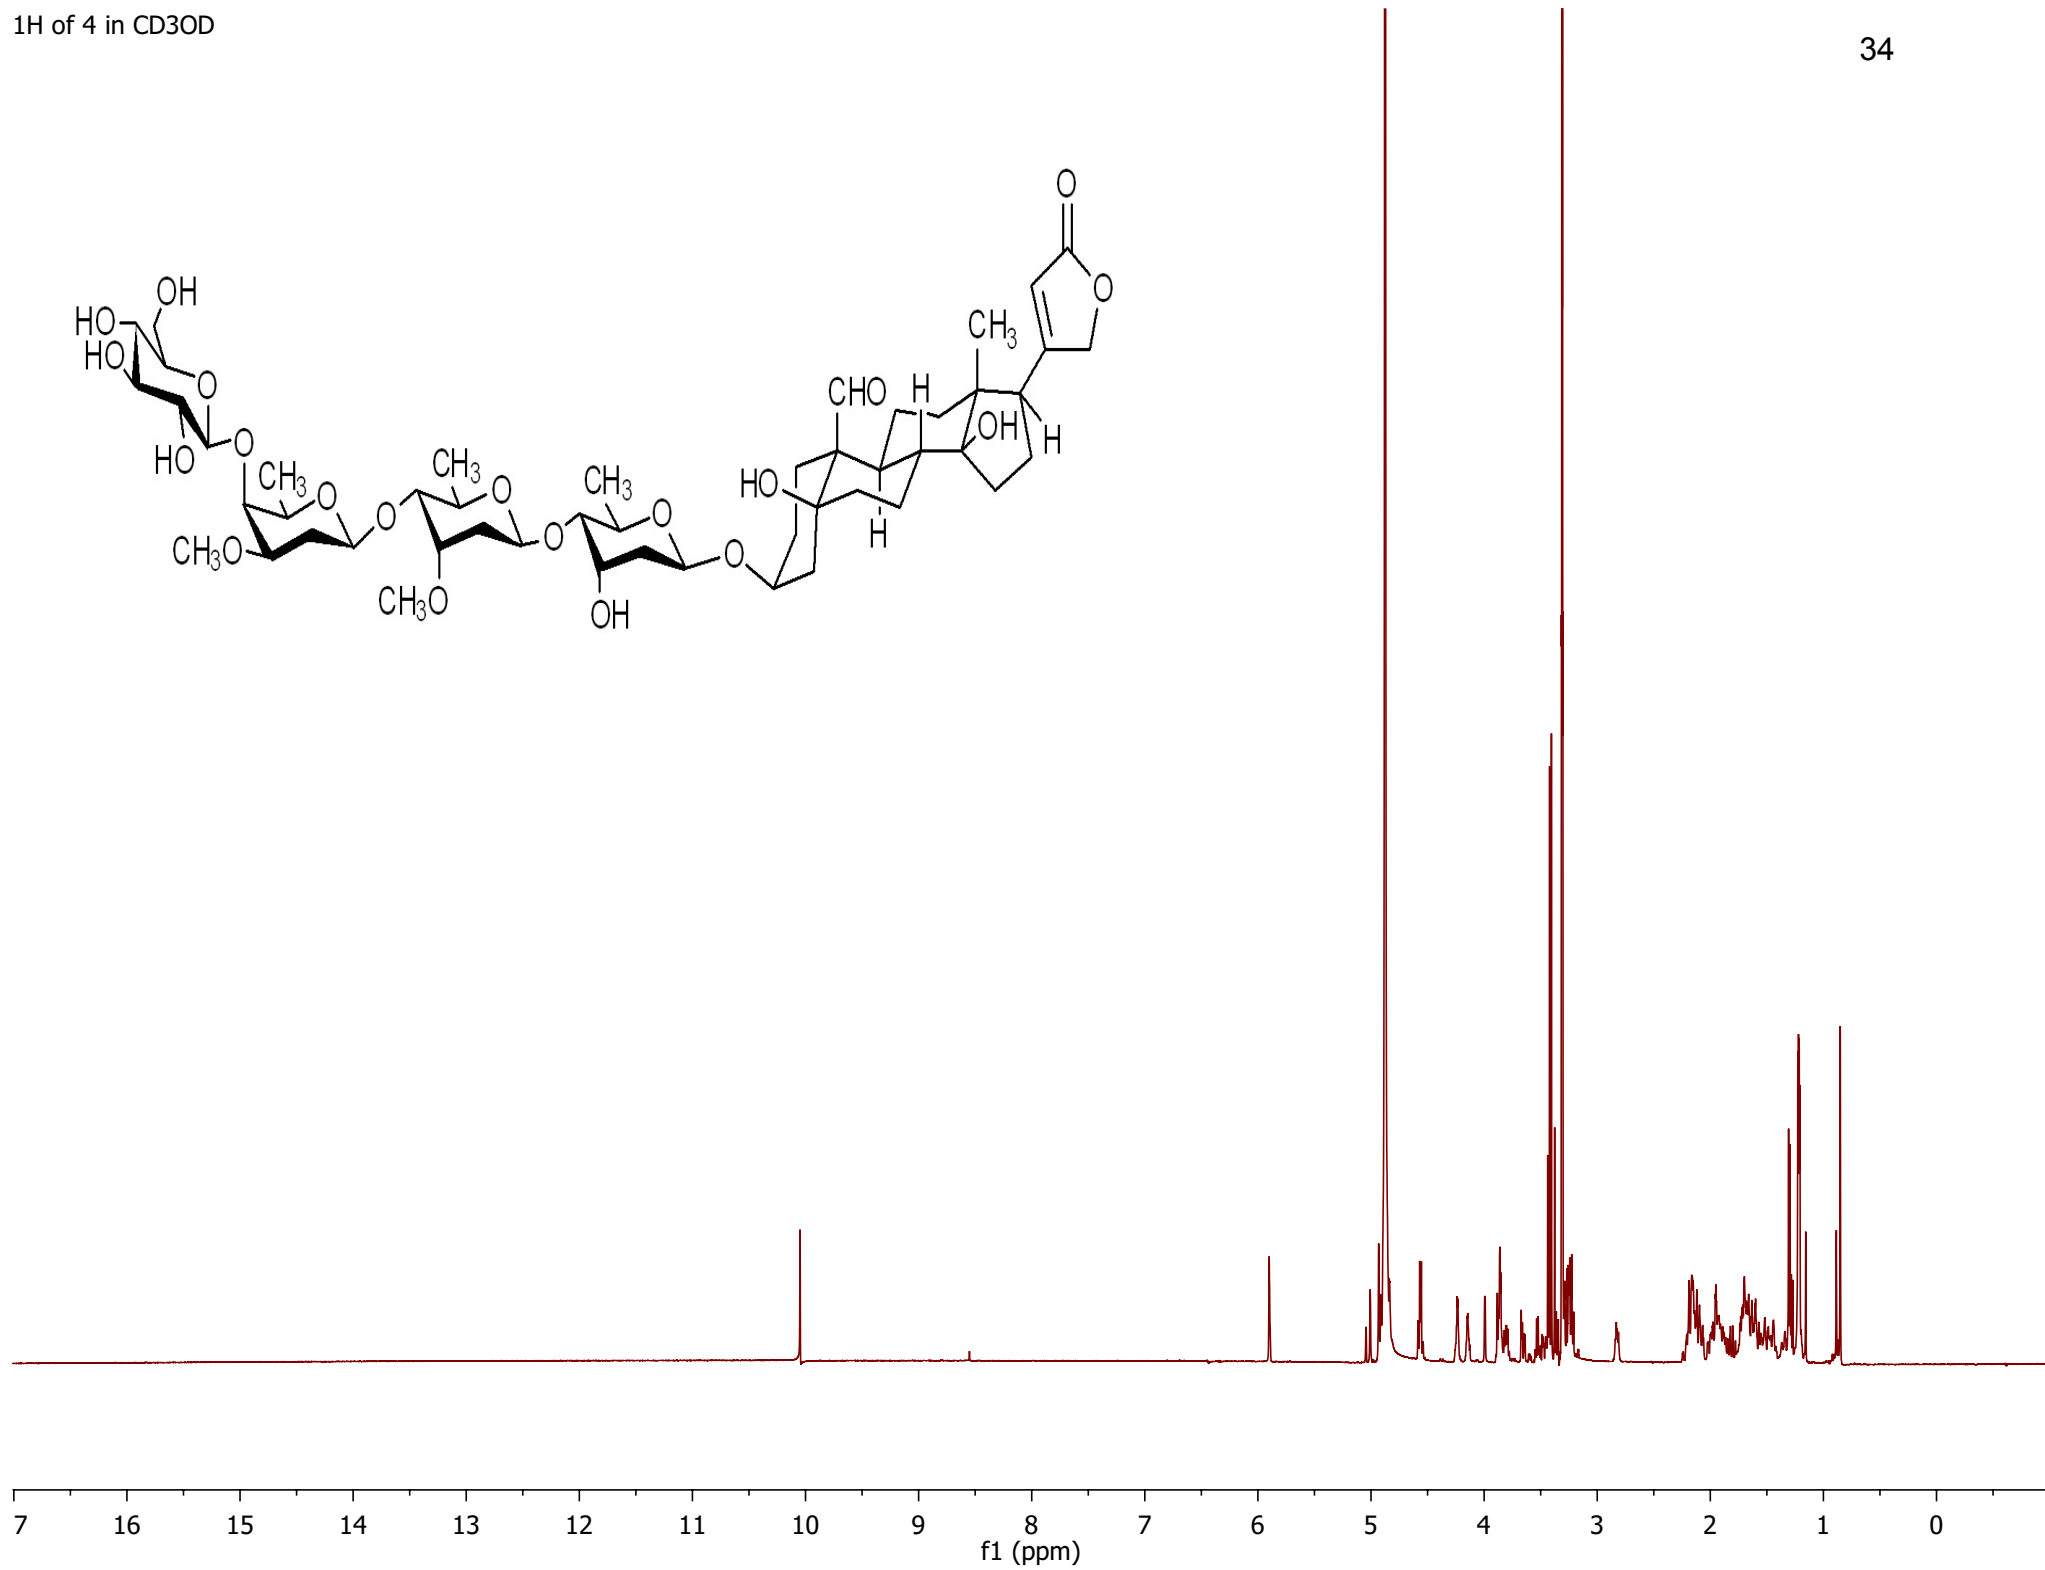

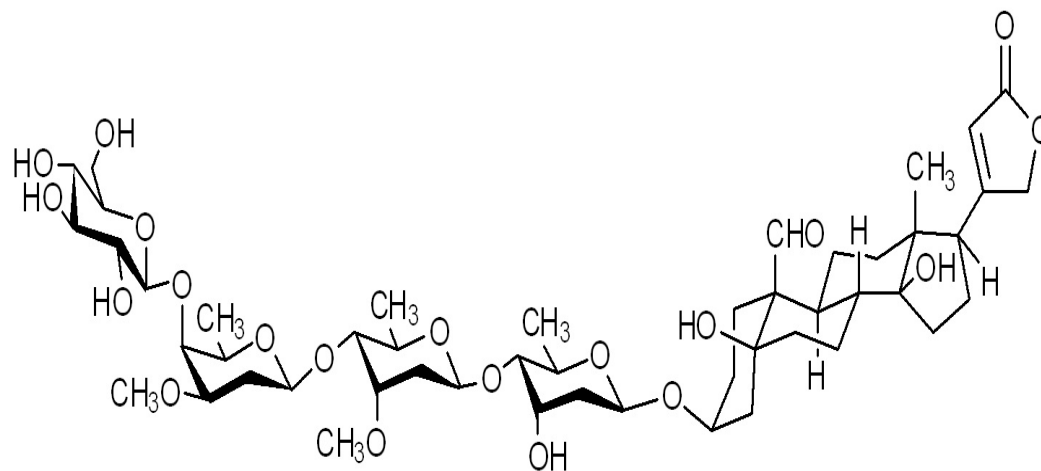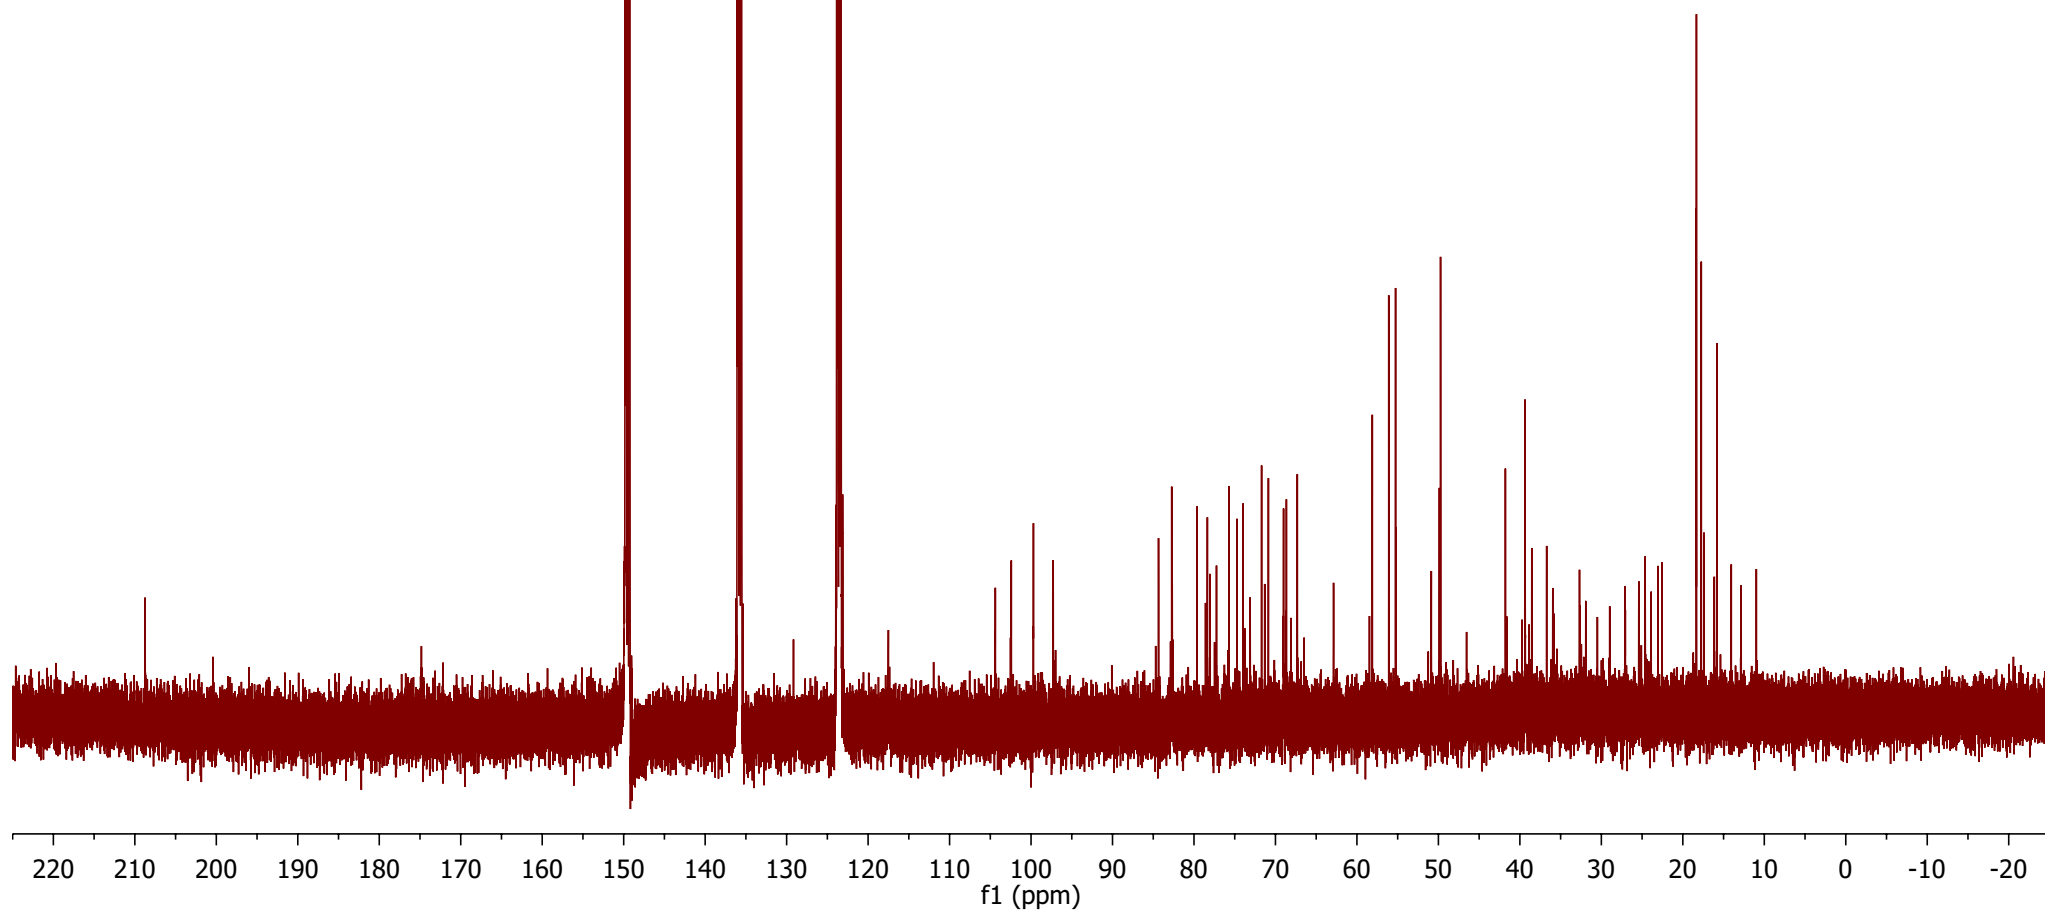

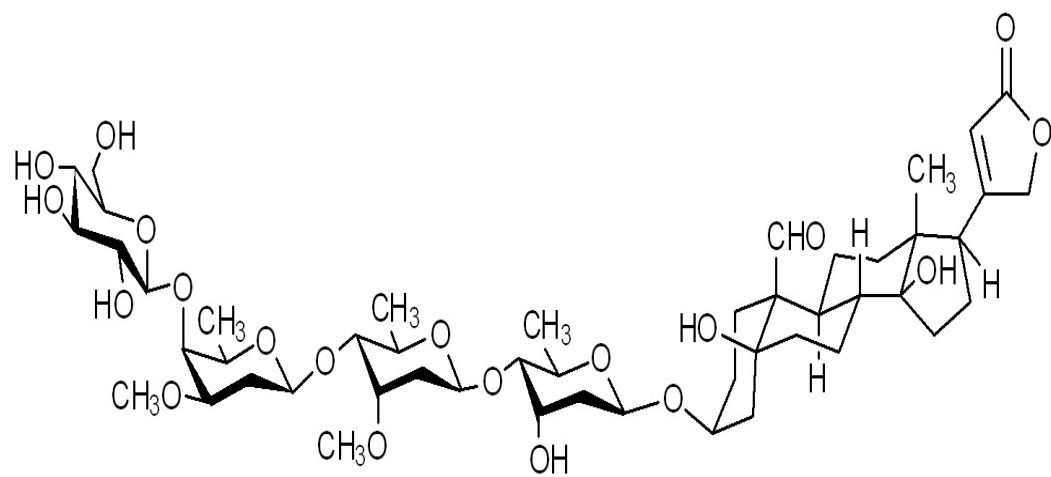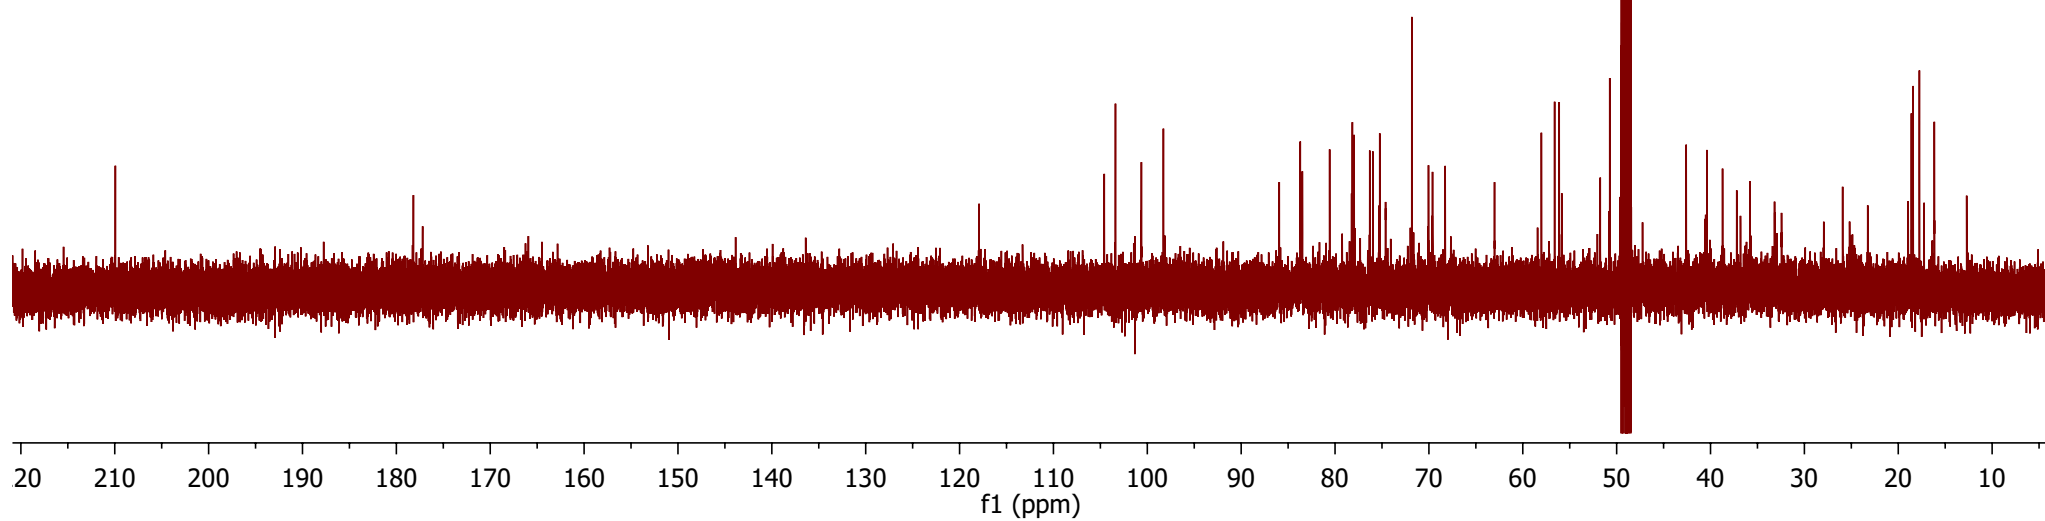

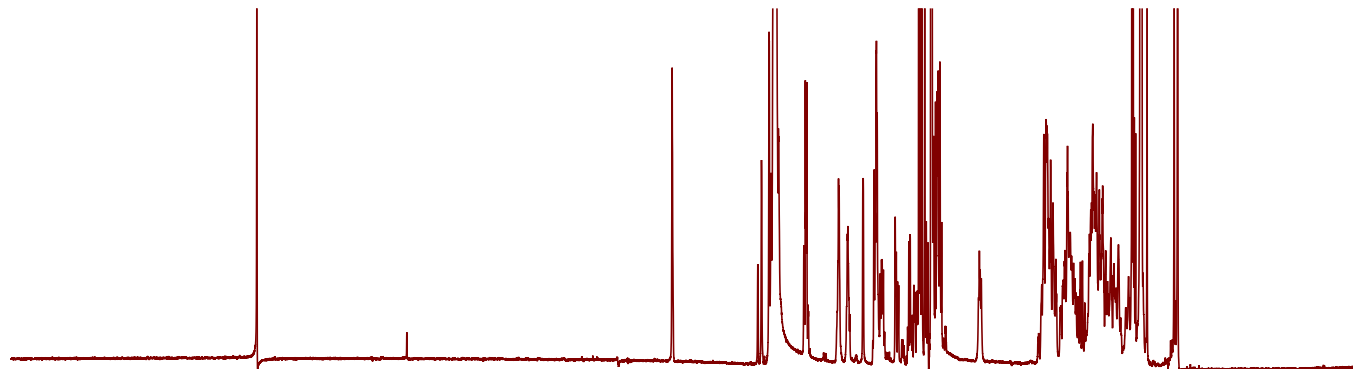COSY of 4 in CD<sub>3</sub>OD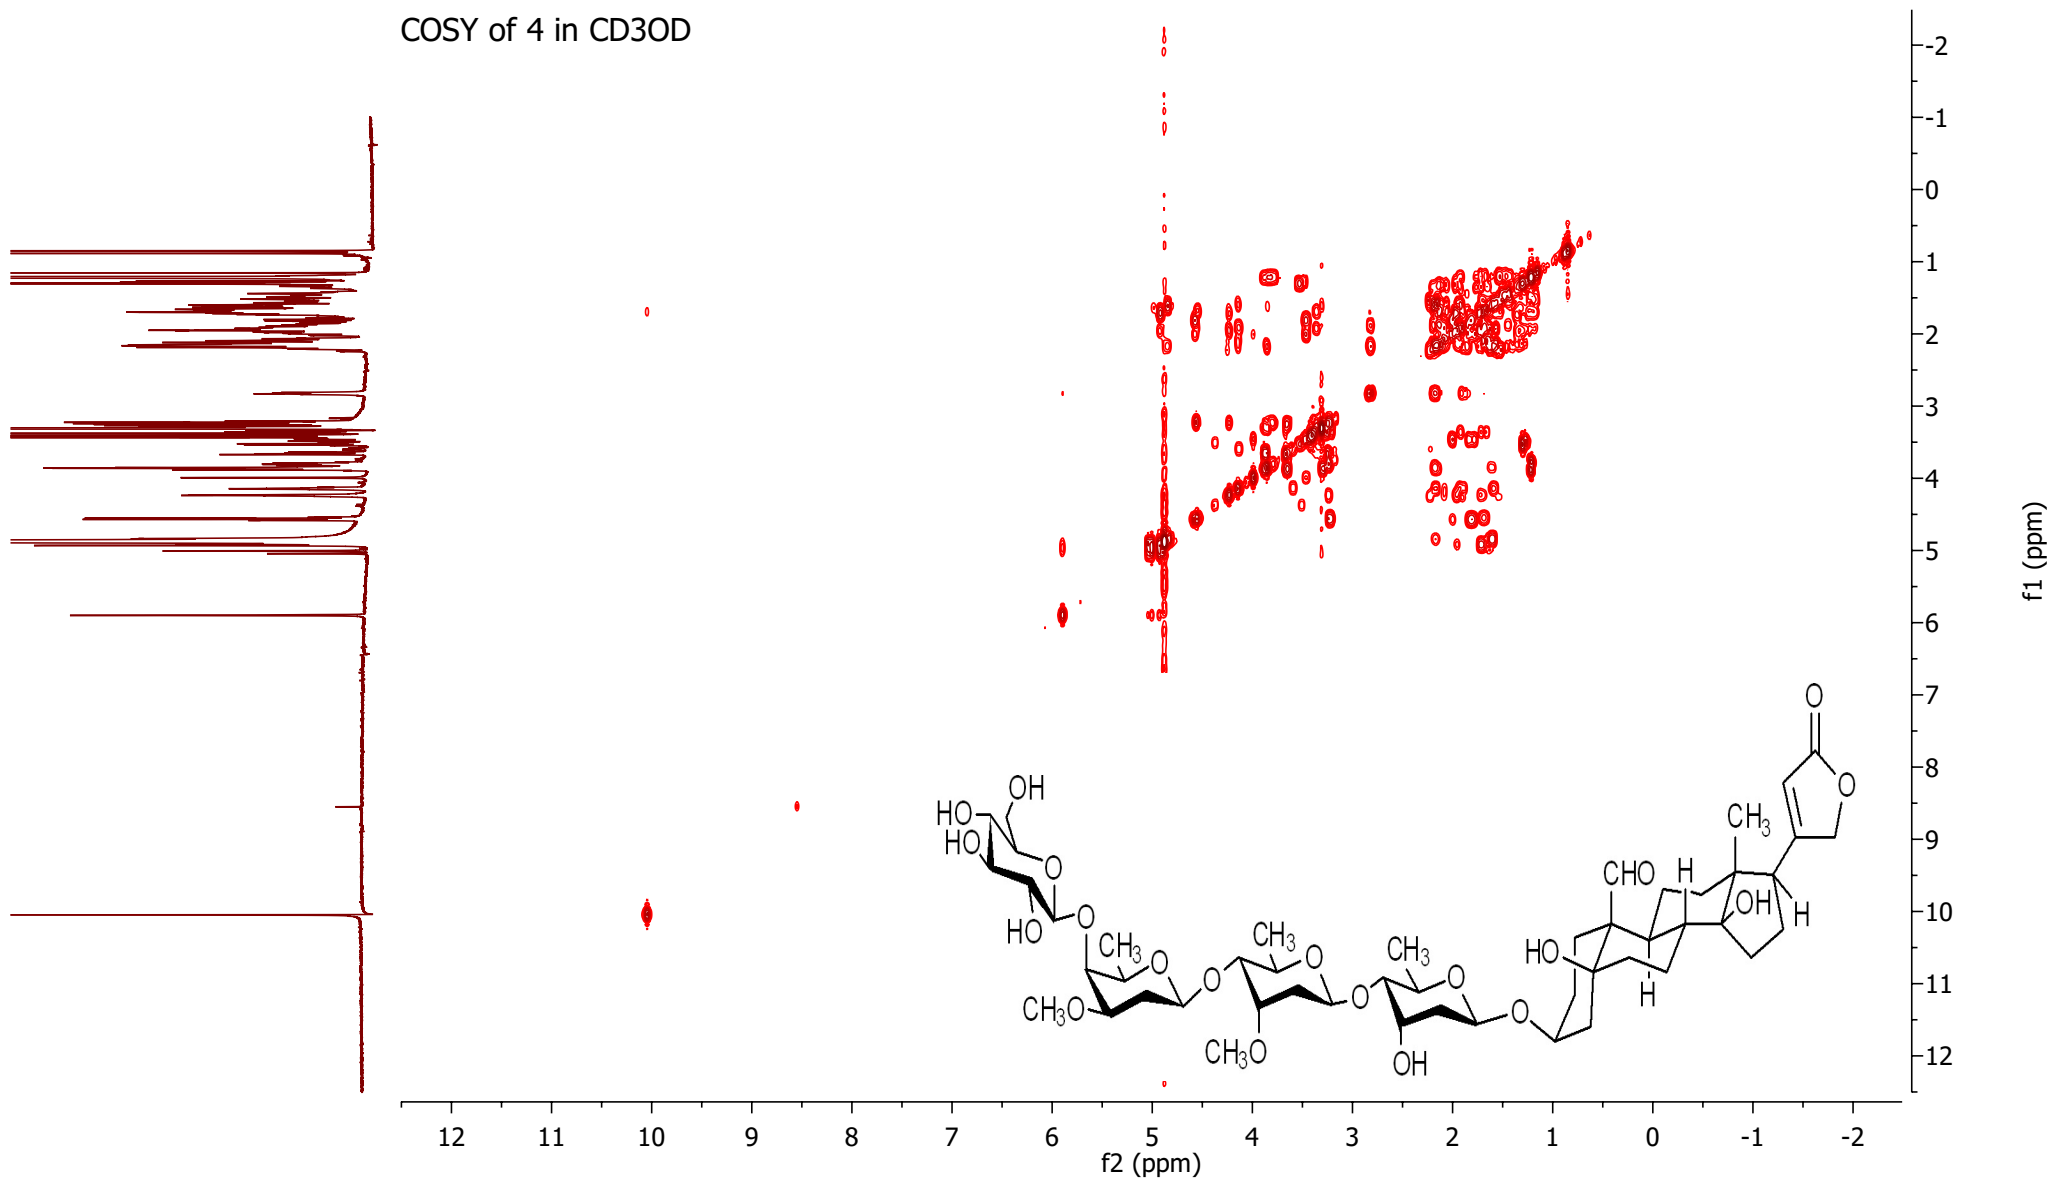

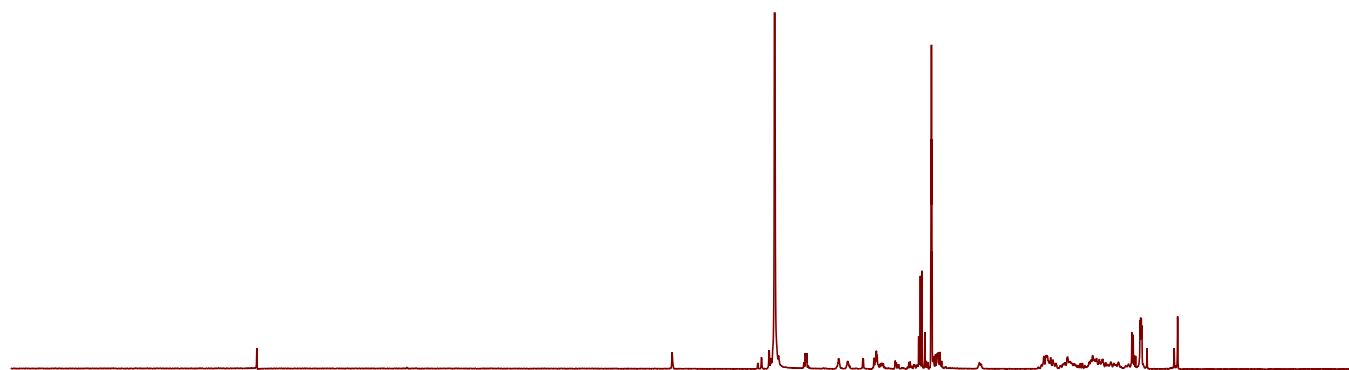

HMQC of 4 in CD3OD

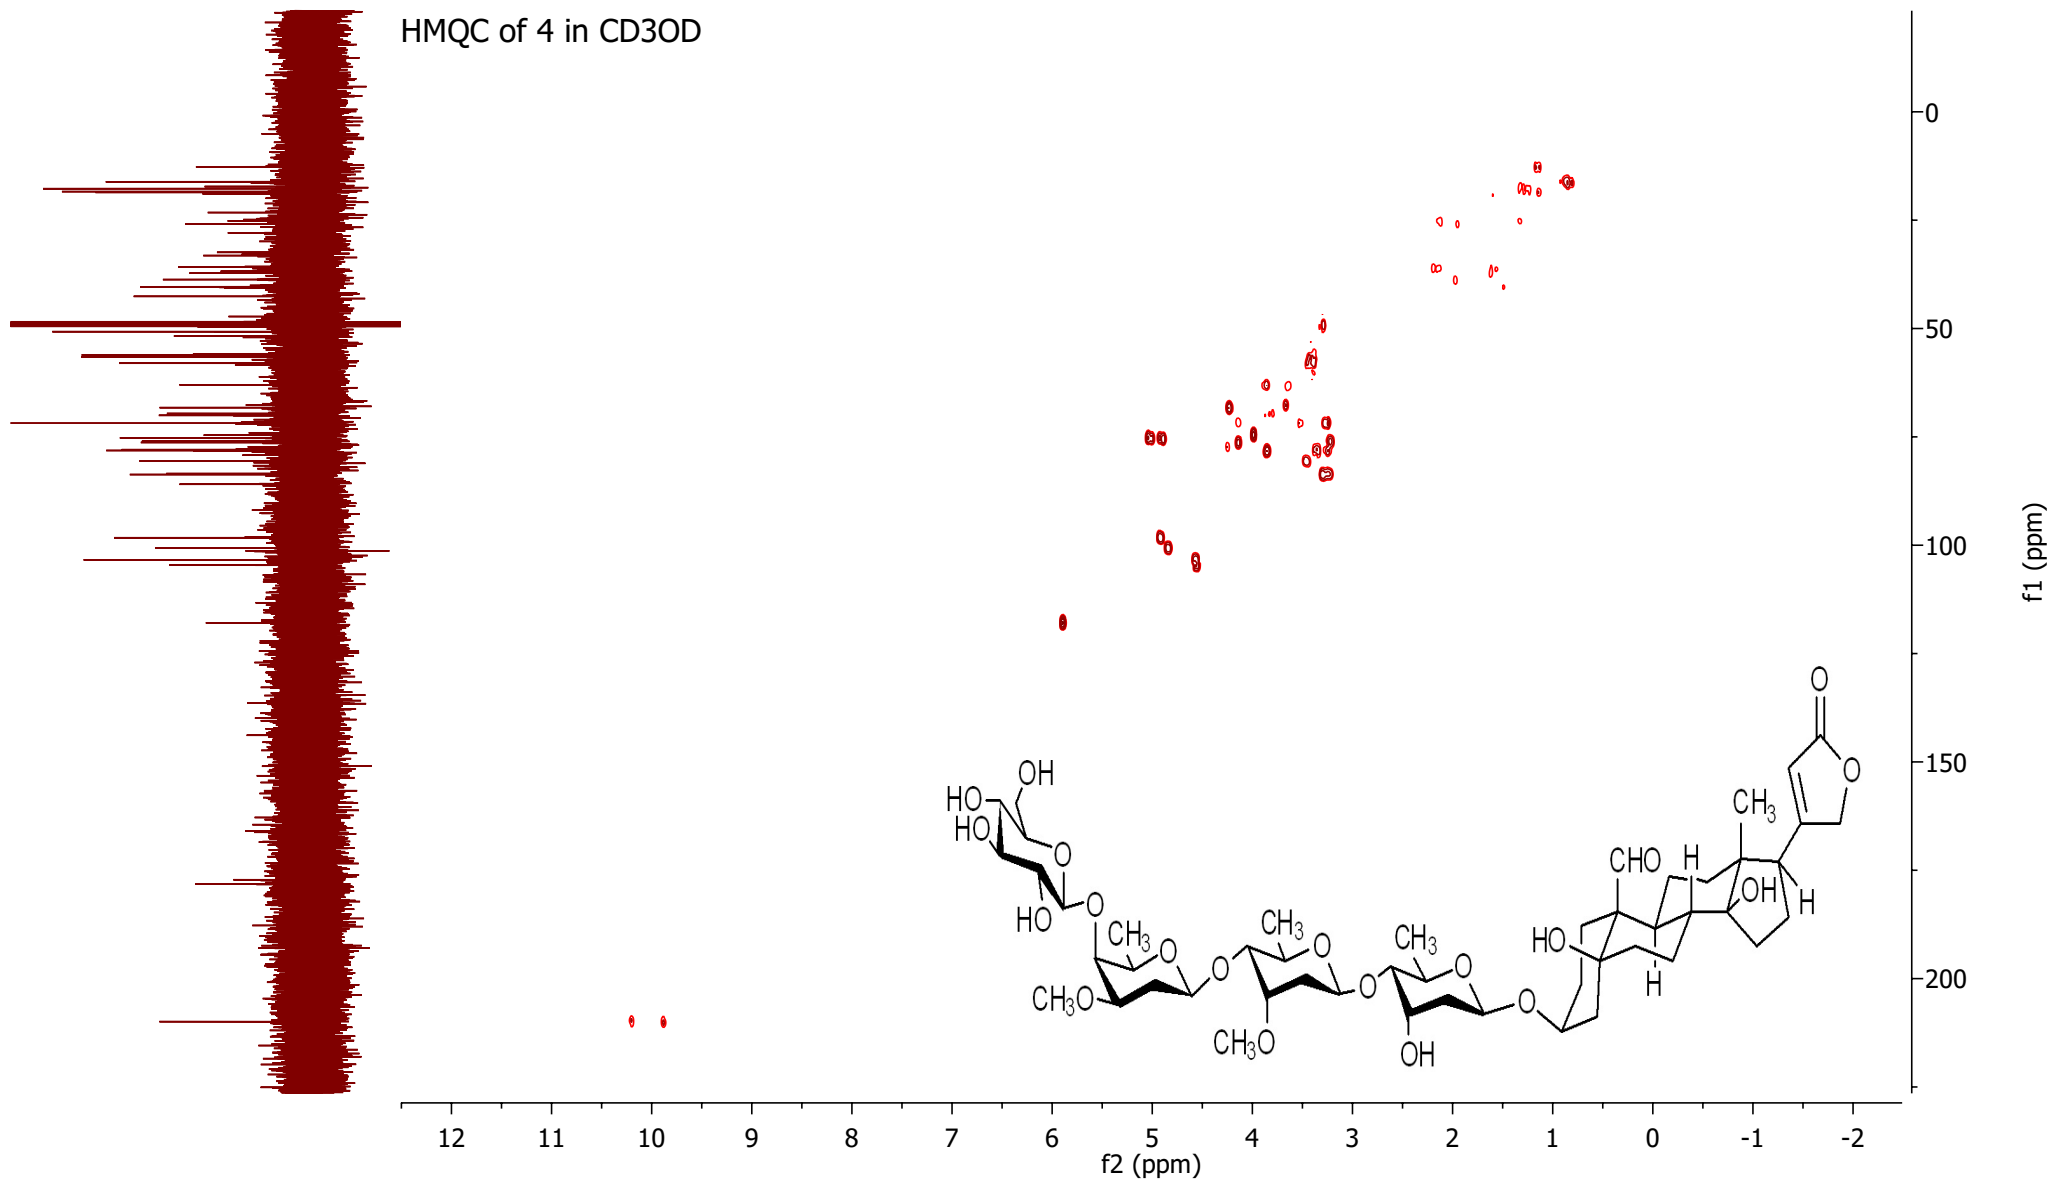

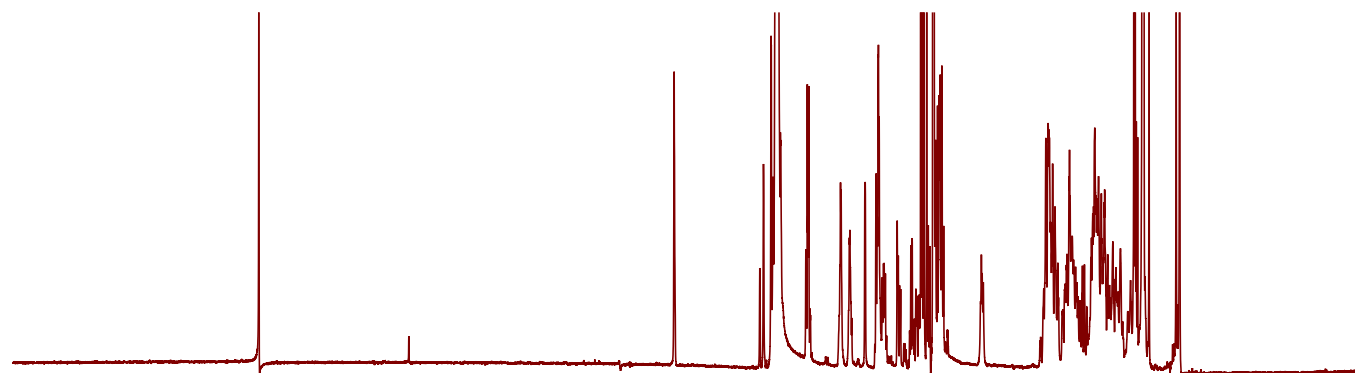

HMBC of 4 in CD3OD

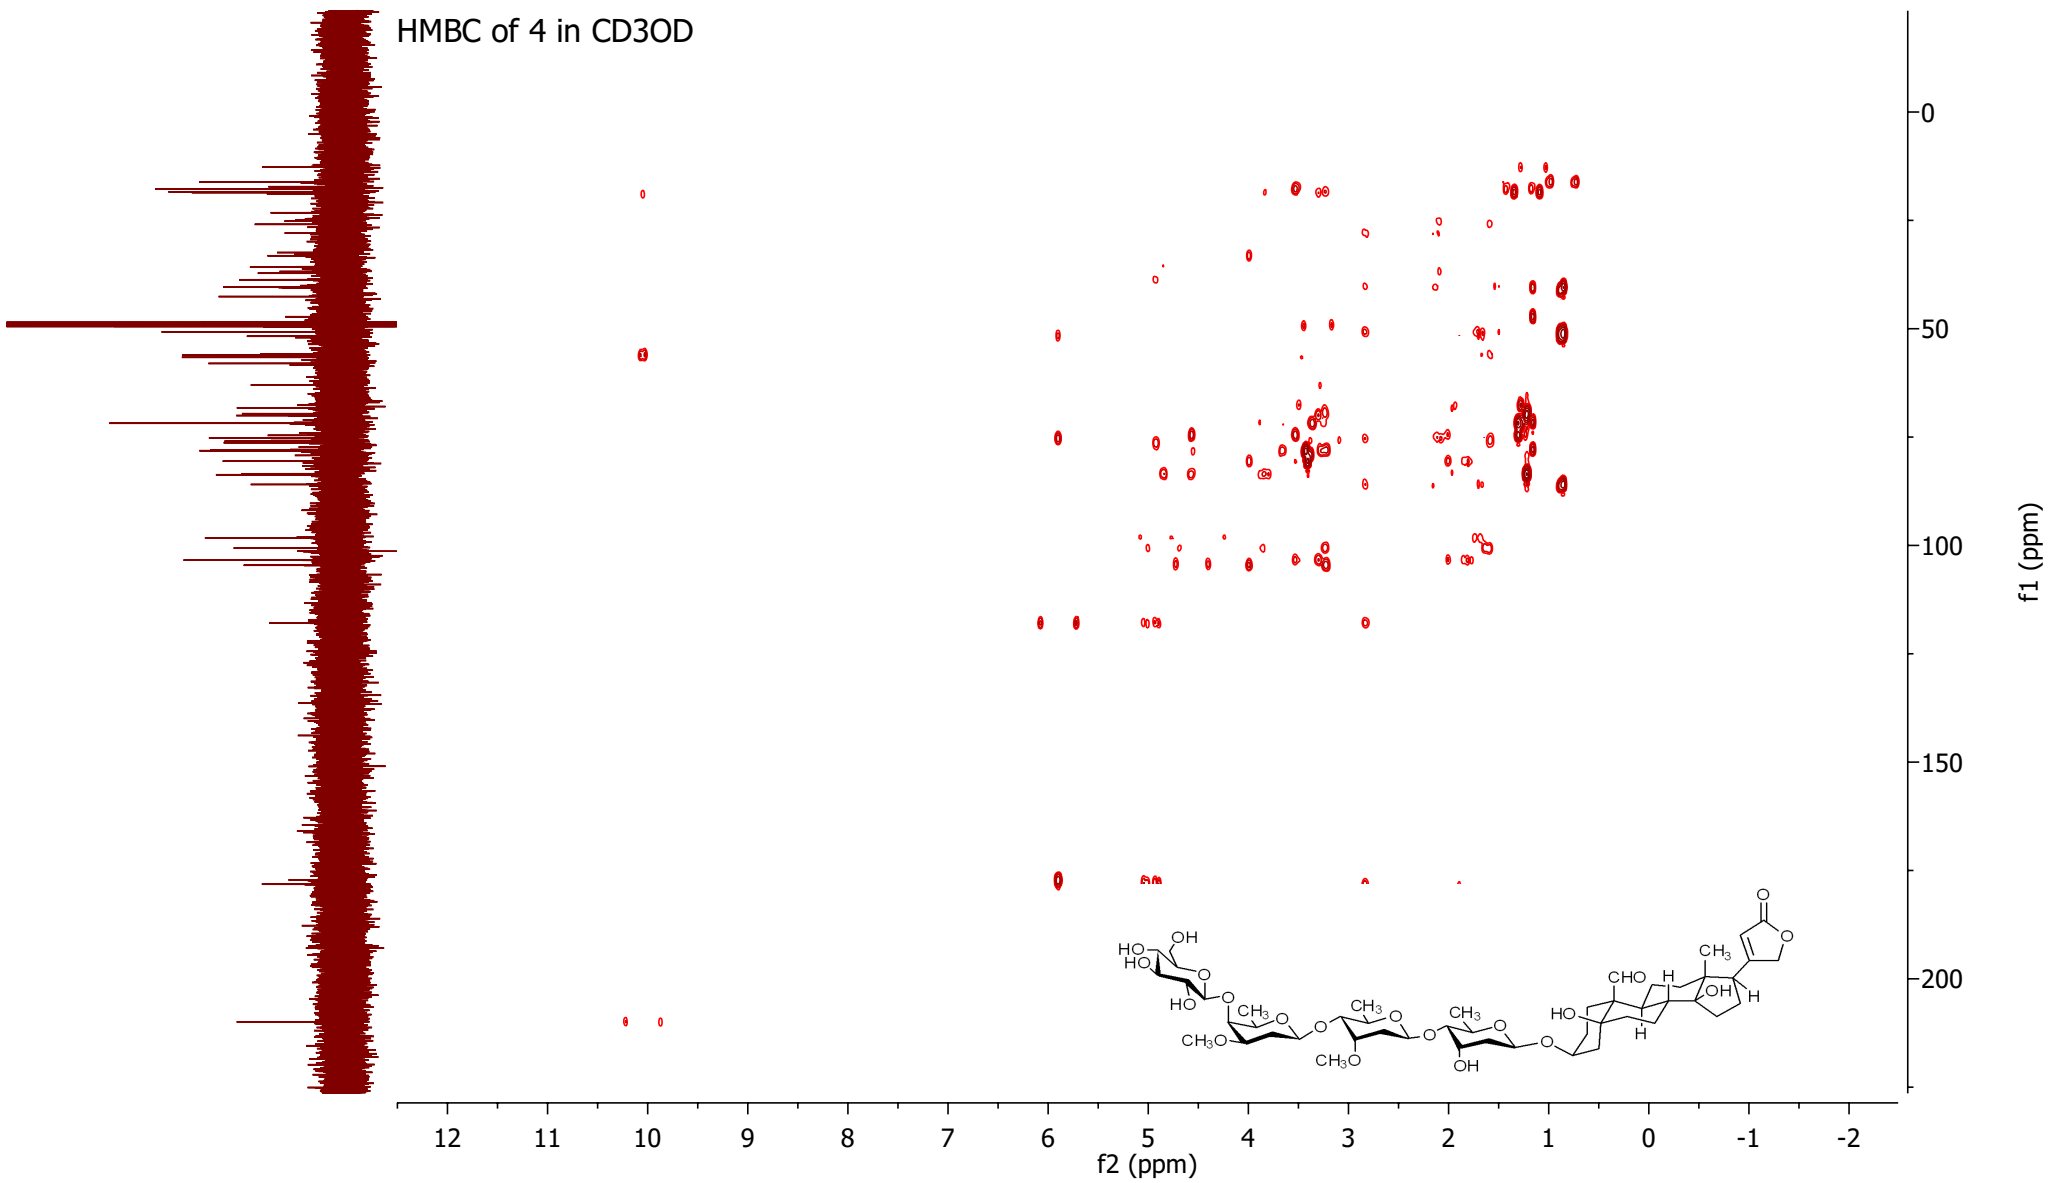

Supplement: NIHMS252681-supplement-01.pdf [file NIHMS252681-supplement-01.pdf]
